# Supplementary material for: XA21-specific induction of stress-related genes following Xanthomonas infection of detached rice leaves
Source: PeerJ. 2016 Sep 28;4:e2446. doi: 10.7717/peerj.2446 (PMC5045893; doi:10.7717/peerj.2446)
Supplement: File S1 [file peerj-04-2446-s005.xlsx]

## Sheet: Sheet1
MSU_LocusID	logFC.00.5	FDR.00.5	logFC.01.0	FDR.01.0	logFC.03.0	FDR.03.0	logFC.06.0	FDR.06.0	logFC.12	FDR.12	Clade	Putative Function(MSU)
LOC_Os01g01160	NA	NA	NA	NA	NA	NA	-2.29671	8.12933e-29	-2.12616	3.50474e-25	3	heat shock protein DnaJ, putative, expressed
LOC_Os01g01170	NA	NA	NA	NA	NA	NA	-2.35667	0.000376977	-2.54476	2.97235e-05	3	expressed protein
LOC_Os01g01340	NA	NA	NA	NA	NA	NA	2.91118	1.23845e-52	NA	NA	1	light-induced protein 1-like, putative, expressed
LOC_Os01g02290	2.87401	2.0793e-16	NA	NA	NA	NA	NA	NA	NA	NA	1	Ser/Thr receptor-like kinase, putative, expressed
LOC_Os01g02300	2.87059	1.21454e-16	NA	NA	NA	NA	NA	NA	NA	NA	1	receptor kinase ORK10, putative, expressed
LOC_Os01g02360	NA	NA	NA	NA	NA	NA	2.19991	4.37937e-06	NA	NA	1	resistance-related receptor-like kinase, putative, expressed
LOC_Os01g02580	NA	NA	NA	NA	NA	NA	NA	NA	-2.18822	0.000512998	3	protein kinase domain containing protein, expressed
LOC_Os01g02680	4.30031	0.0186333	NA	NA	NA	NA	NA	NA	NA	NA	1	protein kinase domain containing protein, expressed
LOC_Os01g03180	NA	NA	NA	NA	NA	NA	-2.00198	1.7246e-05	NA	NA	3	retrotransposon protein, putative, unclassified, expressed
LOC_Os01g03290	NA	NA	NA	NA	NA	NA	NA	NA	-2.61546	0.00512104	3	seven in absentia protein family domain containing protein, expressed
LOC_Os01g03310	NA	NA	NA	NA	NA	NA	-2.25144	7.74507e-05	-4.39203	3.67619e-14	3	BBTI1 - Bowman-Birk type bran trypsin inhibitor precursor, expressed
LOC_Os01g03320	2.35696	0.0490761	NA	NA	NA	NA	NA	NA	-4.36261	7.98866e-07	3	BBTI2 - Bowman-Birk type bran trypsin inhibitor precursor, expressed
LOC_Os01g03360	NA	NA	2.6238	0.00473989	NA	NA	NA	NA	NA	NA	1	BBTI5 - Bowman-Birk type bran trypsin inhibitor precursor, expressed
LOC_Os01g03370	NA	NA	NA	NA	5.9353	0.00120382	5.96171	0.000948849	NA	NA	1	senescence-induced receptor-like serine/threonine-protein kinase precursor, putative, expressed
LOC_Os01g03530	NA	NA	NA	NA	NA	NA	3.35427	5.85404e-07	2.5788	0.000435264	1	multicopper oxidase domain containing protein, expressed
LOC_Os01g03680	NA	NA	5.29612	0.0187928	NA	NA	NA	NA	NA	NA	1	BBTI8 - Bowman-Birk type bran trypsin inhibitor precursor, expressed
LOC_Os01g03810	NA	NA	NA	NA	NA	NA	NA	NA	-2.18599	0.000121833	1	expressed protein
LOC_Os01g04200	NA	NA	NA	NA	NA	NA	-2.07816	6.51324e-15	NA	NA	3	metallo-beta-lactamase family protein, putative, expressed
LOC_Os01g04210	NA	NA	NA	NA	-2.26536	4.46571e-06	-2.72895	4.69794e-08	NA	NA	3	DNA binding protein, putative, expressed
LOC_Os01g04490	NA	NA	NA	NA	NA	NA	2.04982	0.00145595	NA	NA	1	Ser/Thr protein kinase, putative, expressed
LOC_Os01g04530	NA	NA	NA	NA	NA	NA	NA	NA	3.82148	0.00121274	1	expressed protein
LOC_Os01g04540	NA	NA	NA	NA	NA	NA	NA	NA	2.85489	0.0152623	1	serine/threonine-protein kinase At1g18390 precursor, putative, expressed
LOC_Os01g04550	NA	NA	NA	NA	NA	NA	NA	NA	3.38469	0.00362959	1	expressed protein
LOC_Os01g04580	NA	NA	NA	NA	2.09612	1.83039e-11	2.40855	6.04757e-16	NA	NA	1	Ser/Thr protein kinase, putative, expressed
LOC_Os01g05640	NA	NA	NA	NA	3.2184	4.12038e-05	4.18337	5.29986e-10	3.58132	3.91632e-07	1	receptor-like protein kinase 5 precursor, putative, expressed
LOC_Os01g05840	NA	NA	NA	NA	-2.14447	5.98508e-13	-5.23979	3.27062e-52	-4.13559	8.95984e-39	3	oxidoreductase, short chain dehydrogenase/reductase family domain containing family, expressed
LOC_Os01g05870	NA	NA	NA	NA	NA	NA	NA	NA	2.25781	0.00562551	1	receptor kinase, putative, expressed
LOC_Os01g06220	NA	NA	NA	NA	5.48329	0.00279844	6.29155	0.000107578	NA	NA	2	gibberellin receptor GID1L2, putative, expressed
LOC_Os01g06520	NA	NA	NA	NA	NA	NA	NA	NA	2.53324	5.56033e-07	1	verticillium wilt disease resistance protein, putative, expressed
LOC_Os01g06550	NA	NA	NA	NA	NA	NA	2.15963	3.2734e-44	NA	NA	1	NF-X1-type zinc finger protein, putative, expressed
LOC_Os01g06740	2.66592	2.52596e-10	5.20912	6.23922e-42	3.91725	4.10562e-24	3.60816	4.66757e-21	NA	NA	1	ribosome inactivating protein, putative, expressed
LOC_Os01g07970	NA	NA	NA	NA	NA	NA	2.74385	2.23658e-18	3.94102	1.17219e-34	1	expressed protein
LOC_Os01g08020	NA	NA	NA	NA	NA	NA	NA	NA	-2.91095	1.33053e-05	3	boron transporter protein, putative, expressed
LOC_Os01g08130	NA	NA	NA	NA	NA	NA	-3.94895	1.81261e-06	-3.35172	1.45734e-05	3	phototropic-responsive NPH3 family protein, putative, expressed
LOC_Os01g08140	NA	NA	NA	NA	NA	NA	NA	NA	-2.628	2.41238e-05	3	phototropic-responsive NPH3 family protein, putative, expressed
LOC_Os01g08380	2.73337	2.56283e-17	2.25353	7.36197e-11	NA	NA	NA	NA	NA	NA	1	transferase family protein, putative, expressed
LOC_Os01g08440	NA	NA	NA	NA	NA	NA	-2.70776	2.8447e-08	NA	NA	3	UDP-glucoronosyl and UDP-glucosyl transferase domain containing protein, expressed
LOC_Os01g08510	NA	NA	NA	NA	NA	NA	NA	NA	2.61804	2.85789e-13	1	MAR-binding filament-like protein 1, putative, expressed
LOC_Os01g08700	NA	NA	NA	NA	NA	NA	NA	NA	-2.49501	1.19687e-61	1	GIGANTEA, putative, expressed
LOC_Os01g09080	2.60708	2.88289e-11	NA	NA	2.74384	6.19768e-13	2.91364	1.01781e-15	2.74521	1.34845e-13	1	WRKY107, expressed
LOC_Os01g09100	2.98679	7.61861e-14	2.03622	3.89377e-06	2.18858	1.53949e-07	2.13118	1.59977e-07	NA	NA	1	WRKY10, expressed
LOC_Os01g09220	5.11723	4.19207e-39	NA	NA	NA	NA	NA	NA	NA	NA	1	transposon protein, putative, CACTA, En/Spm sub-class, expressed
LOC_Os01g09540	NA	NA	NA	NA	NA	NA	NA	NA	-4.4046	8.3775e-12	1	HAD superfamily phosphatase, putative, expressed
LOC_Os01g09930	NA	NA	NA	NA	-5.23478	0.0321822	NA	NA	NA	NA	3	helix-loop-helix DNA-binding domain containing protein, expressed
LOC_Os01g09990	NA	NA	NA	NA	3.64323	5.15571e-08	3.78	5.47446e-09	2.71096	7.29849e-05	1	helix-loop-helix DNA-binding domain containing protein, expressed
LOC_Os01g10110	NA	NA	NA	NA	NA	NA	3.38397	1.4897e-05	3.63167	3.31351e-06	1	cytokinin dehydrogenase precursor, putative, expressed
LOC_Os01g10210	NA	NA	NA	NA	NA	NA	-2.69382	4.23129e-44	-2.91999	5.83874e-50	3	lachrymatory factor synthase, putative, expressed
LOC_Os01g10320	NA	NA	NA	NA	NA	NA	-2.86867	1.18998e-06	-2.90276	6.11002e-07	3	class III HD-Zip protein 8, putative, expressed
LOC_Os01g10580	NA	NA	NA	NA	3.59782	1.23649e-21	4.92044	4.09648e-39	NA	NA	1	B-box zinc finger family protein, putative, expressed
LOC_Os01g10810	NA	NA	NA	NA	NA	NA	-2.2018	4.48441e-07	NA	NA	3	rho termination factor, N-terminal domain containing protein, expressed
LOC_Os01g10890	NA	NA	NA	NA	NA	NA	-3.00941	4.39816e-37	NA	NA	3	CAMK_KIN1/SNF1/Nim1_like.8 - CAMK includes calcium/calmodulin depedent protein kinases, expressed
LOC_Os01g11520	NA	NA	2.04706	1.90155e-09	2.13924	4.80329e-11	2.65012	4.74915e-18	NA	NA	1	RING-H2 finger protein, putative, expressed
LOC_Os01g11750	NA	NA	NA	NA	NA	NA	NA	NA	2.8107	0.0156134	1	GDSL-like lipase/acylhydrolase, putative, expressed
LOC_Os01g12600	NA	NA	NA	NA	NA	NA	NA	NA	-2.34567	0.000987338	1	retrotransposon protein, putative, unclassified, expressed
LOC_Os01g12710	NA	NA	NA	NA	NA	NA	2.62255	1.04725e-19	2.3694	3.03904e-16	1	oxidoreductase, short chain dehydrogenase/reductase family domain containing protein, expressed
LOC_Os01g12740	NA	NA	NA	NA	NA	NA	-2.2689	7.57157e-11	-2.13691	1.12169e-09	3	cytochrome P450, putative, expressed
LOC_Os01g12750	NA	NA	NA	NA	NA	NA	NA	NA	-2.30112	3.48214e-08	3	cytochrome P450, putative, expressed
LOC_Os01g12770	NA	NA	NA	NA	-2.28877	2.65617e-05	-2.97933	1.17154e-08	-2.99528	1.41389e-08	3	cytochrome P450, putative, expressed
LOC_Os01g12790	NA	NA	NA	NA	NA	NA	NA	NA	2.01779	6.17402e-05	1	receptor protein kinase, putative, expressed
LOC_Os01g12810	NA	NA	NA	NA	-2.29732	5.57182e-43	-2.6294	3.52144e-56	NA	NA	3	retrotransposon protein, putative, unclassified, expressed
LOC_Os01g12920	NA	NA	NA	NA	NA	NA	-2.02761	0.000555367	-2.00734	0.000601669	3	thioesterase family protein, putative, expressed
LOC_Os01g13120	NA	NA	NA	NA	NA	NA	NA	NA	-3.81357	9.08687e-06	3	aquaporin protein, putative, expressed
LOC_Os01g13390	NA	NA	NA	NA	-2.96643	2.18062e-26	-5.63738	1.69774e-69	-2.96928	2.7638e-27	3	expressed protein
LOC_Os01g13480	NA	NA	NA	NA	NA	NA	-2.87891	1.5602e-74	-2.72685	2.31139e-68	3	glutaredoxin, putative, expressed
LOC_Os01g13540	NA	NA	NA	NA	NA	NA	-2.02474	8.2872e-22	-2.16504	1.46667e-24	3	NIN, putative, expressed
LOC_Os01g13610	NA	NA	NA	NA	NA	NA	NA	NA	5.49654	2.37843e-05	1	isoflavone reductase homolog IRL, putative, expressed
LOC_Os01g13690	NA	NA	NA	NA	NA	NA	-2.38807	1.25923e-09	-3.68299	5.183e-20	3	ligA, putative, expressed
LOC_Os01g14410	NA	NA	NA	NA	NA	NA	-3.47468	2.308e-14	-2.12603	3.09292e-06	3	early light-induced protein, chloroplast precursor, putative, expressed
LOC_Os01g14630	2.8797	3.7972e-09	2.74843	2.72851e-08	NA	NA	NA	NA	NA	NA	1	polyprenyl synthetase, putative, expressed
LOC_Os01g14990	NA	NA	NA	NA	NA	NA	NA	NA	6.95018	1.2382e-06	1	GCRP6 - Glycine and cysteine rich family protein precursor, putative, expressed
LOC_Os01g15900	NA	NA	NA	NA	-3.00265	2.03988e-59	-4.11675	2.93389e-97	-4.1195	5.62894e-98	3	expressed protein
LOC_Os01g15970	NA	NA	NA	NA	NA	NA	NA	NA	2.08524	0.000111785	1	expressed protein
LOC_Os01g16170	NA	NA	NA	NA	NA	NA	-2.84473	2.47463e-15	-2.05117	1.55425e-08	3	PQ loop repeat domain containing protein, expressed
LOC_Os01g16620	NA	NA	NA	NA	2.29832	1.19679e-22	4.09387	2.36458e-66	2.27449	1.01583e-22	1	expressed protein
LOC_Os01g16750	NA	NA	NA	NA	NA	NA	-4.18069	0.000512008	-5.88319	0.000620257	3	flavin monooxygenase, putative, expressed
LOC_Os01g16810	NA	NA	2.63432	1.75243e-13	NA	NA	NA	NA	NA	NA	1	MYB family transcription factor, putative, expressed
LOC_Os01g16980	NA	NA	NA	NA	NA	NA	NA	NA	-2.44427	1.14706e-12	3	expressed protein
LOC_Os01g17170	NA	NA	NA	NA	NA	NA	-2.70844	1.50085e-22	-3.87983	1.4504e-41	3	magnesium-protoporphyrin IX monomethyl ester cyclase,chloroplast precursor, putative, expressed
LOC_Os01g17240	NA	NA	NA	NA	NA	NA	NA	NA	-2.37497	1.21523e-53	1	transporter, major facilitator family, putative, expressed
LOC_Os01g17330	NA	NA	2.79437	0.000448261	NA	NA	2.29526	0.0046162	2.25537	0.00718593	1	eukaryotic translation initiation factor 6, putative, expressed
LOC_Os01g17396	NA	NA	NA	NA	-2.9159	5.59944e-66	-6.88516	9.81199e-181	-10.094	2.07487e-192	3	expressed protein
LOC_Os01g18120	NA	NA	NA	NA	NA	NA	NA	NA	-3.69792	0.000137638	3	cinnamoyl CoA reductase, putative, expressed
LOC_Os01g18170	NA	NA	3.87325	0.0309697	4.55371	0.000167932	4.13245	0.00248955	NA	NA	1	Cupin domain containing protein, expressed
LOC_Os01g19260	NA	NA	2.16084	0.000419191	2.32888	5.11855e-05	2.53152	3.43976e-06	NA	NA	1	ATPase, putative, expressed
LOC_Os01g19330	2.30565	0.000654994	2.2559	0.00145492	2.20341	0.000746188	2.90347	8.43573e-08	NA	NA	1	MYB family transcription factor, putative, expressed
LOC_Os01g19970	NA	NA	NA	NA	NA	NA	-2.19486	1.26985e-07	NA	NA	3	MYB family transcription factor, putative, expressed
LOC_Os01g20206	5.99508	7.41128e-29	5.97537	2.68272e-28	4.57591	3.66217e-15	4.25123	1.86508e-13	NA	NA	2	methyltransferase, putative, expressed
LOC_Os01g20980	2.28003	2.3177e-06	2.94433	2.24755e-10	2.09941	1.04399e-05	NA	NA	2.26537	7.86962e-07	1	pectinesterase, putative, expressed
LOC_Os01g21120	NA	NA	NA	NA	NA	NA	2.69033	2.62674e-12	NA	NA	1	AP2 domain containing protein, expressed
LOC_Os01g21250	NA	NA	2.69495	2.46238e-23	NA	NA	NA	NA	NA	NA	1	late embryogenesis abundant protein, putative, expressed
LOC_Os01g22000	5.41226	0.013375	5.83604	0.00145591	4.76066	0.0462457	NA	NA	NA	NA	2	expressed protein
LOC_Os01g22249	NA	NA	NA	NA	NA	NA	2.12809	5.22417e-06	2.77139	2.42881e-09	1	peroxidase precursor, putative, expressed
LOC_Os01g22336	NA	NA	NA	NA	NA	NA	NA	NA	3.34723	0.00403567	1	peroxidase precursor, putative, expressed
LOC_Os01g22352	NA	NA	NA	NA	NA	NA	2.37184	5.43154e-07	3.50782	8.68122e-14	1	peroxidase precursor, putative, expressed
LOC_Os01g22980	NA	NA	NA	NA	NA	NA	NA	NA	-2.84825	6.78622e-27	1	OsSCP3 - Putative Serine Carboxypeptidase homologue, expressed
LOC_Os01g23580	NA	NA	2.2839	0.000827662	3.37153	3.03197e-09	4.20365	2.78937e-15	3.80251	2.17597e-12	1	inorganic H+ pyrophosphatase, putative, expressed
LOC_Os01g24010	NA	NA	NA	NA	3.56403	1.53601e-10	3.7727	3.56547e-12	2.37935	3.51633e-05	1	pleiotropic drug resistance protein, putative, expressed
LOC_Os01g24560	NA	NA	NA	NA	NA	NA	5.5531	0.00138736	5.56671	0.00104253	1	fruit bromelain precursor, putative, expressed
LOC_Os01g24710	NA	NA	NA	NA	NA	NA	NA	NA	2.07647	2.50125e-05	1	jacalin-like lectin domain containing protein, expressed
LOC_Os01g25010	NA	NA	NA	NA	-2.25619	0.00175034	-2.62819	4.53391e-05	-2.16086	0.00196822	3	flavonol synthase/flavanone 3-hydroxylase, putative, expressed
LOC_Os01g26039	NA	NA	NA	NA	NA	NA	-2.06593	1.1296e-22	NA	NA	3	expressed protein
LOC_Os01g26300	NA	NA	NA	NA	NA	NA	NA	NA	2.07857	0.000932074	1	OsWAK9 - OsWAK receptor-like cytoplasmic kinase OsWAK-RLCK, expressed
LOC_Os01g27340	NA	NA	3.53765	1.23133e-07	2.94303	3.09367e-05	NA	NA	NA	NA	1	glutathione S-transferase, putative, expressed
LOC_Os01g27860	2.97659	0.00439623	2.96483	0.00586461	3.10279	0.000591413	3.65329	2.63806e-06	2.59168	0.0112441	1	expressed protein
LOC_Os01g28790	3.63961	1.18249e-39	NA	NA	NA	NA	NA	NA	NA	NA	1	PRAS-rich protein, putative, expressed
LOC_Os01g28840	NA	NA	NA	NA	NA	NA	3.02599	0.00248888	NA	NA	1	C4-dicarboxylate transporter/malic acid transport protein, expressed
LOC_Os01g29280	3.67587	1.48391e-24	3.71894	2.24472e-24	3.76779	6.89943e-26	4.07997	5.3352e-32	2.24551	8.70782e-09	1	expressed protein
LOC_Os01g29330	2.59647	1.64027e-17	2.71052	7.32952e-19	2.77932	6.58094e-20	3.27637	2.24625e-27	NA	NA	1	expressed protein
LOC_Os01g31360	NA	NA	NA	NA	NA	NA	NA	NA	-8.6732	0	3	expressed protein
LOC_Os01g31370	3.48462	3.13895e-07	2.22761	0.0197725	2.86388	6.44089e-05	3.43676	8.8276e-08	NA	NA	1	glycosyltransferase, putative, expressed
LOC_Os01g31690	NA	NA	NA	NA	NA	NA	NA	NA	-3.56057	4.66025e-55	3	oxygen-evolving enhancer protein 1, chloroplast precursor, putative, expressed
LOC_Os01g32670	NA	NA	2.30289	0.00845786	NA	NA	NA	NA	2.91681	5.47853e-05	1	expressed protein
LOC_Os01g33869	NA	NA	NA	NA	NA	NA	NA	NA	3.26175	0.0139533	1	expressed protein
LOC_Os01g34050	NA	NA	NA	NA	NA	NA	-4.02668	0.00229804	NA	NA	3	expressed protein
LOC_Os01g34410	NA	NA	NA	NA	NA	NA	NA	NA	-3.19412	0.00885083	3	transposon protein, putative, Pong sub-class, expressed
LOC_Os01g34630	NA	NA	NA	NA	NA	NA	2.07936	1.06022e-29	NA	NA	1	retrotransposon protein, putative, Ty1-copia subclass, expressed
LOC_Os01g36390	NA	NA	NA	NA	NA	NA	2.14269	7.6533e-06	NA	NA	1	MCM4 - Putative minichromosome maintenance MCM complex subunit 4, expressed
LOC_Os01g36720	NA	NA	NA	NA	NA	NA	-4.15242	0.00446227	-5.83728	0.00529768	3	transporter, major facilitator family, putative, expressed
LOC_Os01g36790	NA	NA	NA	NA	2.25042	1.35626e-23	2.18979	4.45918e-23	NA	NA	1	TKL_IRAK_DUF26-lf.2 - DUF26 kinases have homology to DUF26 containing loci, expressed
LOC_Os01g37460	NA	NA	NA	NA	NA	NA	NA	NA	-2.02869	0.00343825	3	zinc finger family protein, putative, expressed
LOC_Os01g37750	NA	NA	2.0058	1.62949e-06	NA	NA	NA	NA	NA	NA	1	glutathione S-transferase, putative, expressed
LOC_Os01g38110	5.62534	0.00789611	8.79044	6.44448e-16	8.90499	1.34785e-15	10.5967	1.29882e-24	9.80597	4.17483e-20	2	cytochrome P450, putative, expressed
LOC_Os01g38180	NA	NA	NA	NA	2.1767	0.0200604	2.72819	0.000329847	NA	NA	1	peptidyl-prolyl isomerase, putative, expressed
LOC_Os01g38229	NA	NA	NA	NA	NA	NA	2.45027	3.72273e-14	NA	NA	1	peptidyl-prolyl isomerase, putative, expressed
LOC_Os01g38530	NA	NA	NA	NA	NA	NA	2.46942	1.67689e-70	2.57555	5.9968e-77	1	ELF3 protein, putative, expressed
LOC_Os01g39136	NA	NA	NA	NA	2.36595	9.90026e-05	NA	NA	NA	NA	1	retrotransposon protein, putative, unclassified, expressed
LOC_Os01g39330	2.27032	3.07522e-11	2.04852	4.60096e-09	NA	NA	2.23093	1.74487e-11	NA	NA	1	helix-loop-helix DNA-binding domain containing protein, expressed
LOC_Os01g40070	2.0096	2.58447e-19	NA	NA	NA	NA	NA	NA	NA	NA	1	expressed protein
LOC_Os01g40310	NA	NA	NA	NA	NA	NA	-2.79644	1.08766e-36	-2.8802	1.18167e-38	3	expressed protein
LOC_Os01g40430	NA	NA	5.74196	0.0021671	5.76354	0.000694748	6.29872	0.000100921	NA	NA	2	WRKY27, expressed
LOC_Os01g40499	NA	NA	NA	NA	NA	NA	2.22961	6.76466e-09	NA	NA	1	S-locus lectin protein kinase family protein, putative, expressed
LOC_Os01g40870	NA	NA	NA	NA	NA	NA	2.42887	6.47097e-17	2.44906	5.14578e-17	1	aldehyde dehydrogenase, putative, expressed
LOC_Os01g41420	6.89379	2.90358e-29	3.68941	8.66605e-10	2.35207	0.000226155	3.2343	2.83576e-08	2.06821	0.00118266	1	transmembrane amino acid transporter protein, putative, expressed
LOC_Os01g41430	2.75537	5.08116e-13	3.38017	2.18538e-19	3.55252	1.75753e-21	3.29647	2.46951e-19	2.39161	2.60348e-10	1	UDP-glucoronosyl and UDP-glucosyl transferase, putative, expressed
LOC_Os01g41710	NA	NA	NA	NA	NA	NA	NA	NA	-4.09066	5.0709e-45	3	chlorophyll A-B binding protein, putative, expressed
LOC_Os01g41720	NA	NA	NA	NA	-2.03679	7.05474e-05	-3.34275	7.33468e-11	NA	NA	3	expressed protein
LOC_Os01g41770	NA	NA	NA	NA	NA	NA	3.93293	0.000283114	3.58244	0.00243182	1	leucine rich repeat protein, putative, expressed
LOC_Os01g41930	NA	NA	NA	NA	NA	NA	-3.63988	1.1238e-09	-2.80696	5.93887e-07	3	leucine rich repeat protein, putative, expressed
LOC_Os01g42060	NA	NA	NA	NA	2.55152	0.0257743	NA	NA	NA	NA	1	expressed protein
LOC_Os01g42190	2.82479	2.44862e-11	2.40996	1.03446e-07	4.3661	3.99433e-30	7.46376	2.17968e-85	NA	NA	2	heat shock protein DnaJ, putative, expressed
LOC_Os01g42370	NA	NA	NA	NA	NA	NA	2.45113	3.94466e-05	2.475	7.04723e-05	1	pleiotropic drug resistance protein, putative, expressed
LOC_Os01g42380	2.30035	1.4211e-21	3.73473	1.51274e-51	3.77726	1.33634e-52	3.35319	1.1508e-43	NA	NA	1	pleiotropic drug resistance protein, putative, expressed
LOC_Os01g42410	2.34101	2.00869e-18	2.46288	3.73388e-20	2.28174	1.24012e-17	2.58269	1.02134e-22	NA	NA	1	pleiotropic drug resistance protein, putative, expressed
LOC_Os01g42860	NA	NA	5.1762	7.31693e-25	5.50891	6.23561e-28	5.39301	9.07813e-28	3.96033	5.6819e-16	2	inhibitor I family protein, putative, expressed
LOC_Os01g43280	NA	NA	-2.81889	0.00755366	NA	NA	-2.32082	0.00242193	NA	NA	3	hydroquinone glucosyltransferase, putative, expressed
LOC_Os01g43590	NA	NA	NA	NA	-2.40249	0.00168286	NA	NA	NA	NA	3	HSF-type DNA-binding domain containing protein, expressed
LOC_Os01g43750	NA	NA	NA	NA	NA	NA	2.69218	0.000133817	NA	NA	1	cytochrome P450 72A1, putative, expressed
LOC_Os01g43774	NA	NA	NA	NA	NA	NA	2.21995	0.00319869	2.30095	0.00196737	1	cytochrome P450 72A1, putative, expressed
LOC_Os01g44120	5.83975	4.29751e-17	4.23339	5.93439e-07	3.06798	0.00665003	3.5646	6.36523e-05	NA	NA	1	expressed protein
LOC_Os01g44960	NA	NA	NA	NA	NA	NA	NA	NA	2.2813	9.32193e-06	1	hydrolase, alpha/beta fold family domain containing protein, expressed
LOC_Os01g45110	NA	NA	NA	NA	2.75767	0.00996687	NA	NA	NA	NA	1	anthocyanin 3-O-beta-glucosyltransferase, putative, expressed
LOC_Os01g45274	NA	NA	NA	NA	NA	NA	NA	NA	-2.43502	3.27823e-20	3	carbonic anhydrase, chloroplast precursor, putative, expressed
LOC_Os01g45460	NA	NA	NA	NA	NA	NA	-2.51615	4.2186e-12	NA	NA	3	serine esterase, putative, expressed
LOC_Os01g45520	NA	NA	NA	NA	NA	NA	NA	NA	2.9073	4.97638e-15	1	D-mannose binding lectin family protein, expressed
LOC_Os01g45720	4.89293	2.18871e-11	4.90858	4.65986e-11	5.92215	2.03229e-20	5.42117	2.10472e-16	3.44818	0.000124047	2	expressed protein
LOC_Os01g45830	NA	NA	NA	NA	NA	NA	2.01544	6.913e-16	NA	NA	1	sulfate transporter, putative, expressed
LOC_Os01g45840	NA	NA	NA	NA	NA	NA	2.39143	2.25011e-16	NA	NA	1	CRR2, putative, expressed
LOC_Os01g45914	NA	NA	NA	NA	NA	NA	NA	NA	-3.55374	2.48511e-08	3	expressed protein
LOC_Os01g46440	5.47869	0.00891165	NA	NA	NA	NA	NA	NA	NA	NA	2	VQ domain containing protein, putative, expressed
LOC_Os01g46720	NA	NA	NA	NA	NA	NA	NA	NA	-3.12869	3.57438e-18	3	expressed protein
LOC_Os01g46820	NA	NA	NA	NA	-2.3793	0.000625043	NA	NA	NA	NA	3	expressed protein
LOC_Os01g47630	NA	NA	NA	NA	-2.12034	2.39555e-30	-4.23774	2.78781e-96	-2.4247	5.54339e-40	3	expressed protein
LOC_Os01g47840	NA	NA	3.21818	1.69952e-17	4.49743	2.0565e-32	4.52369	1.16152e-33	2.84879	1.60161e-14	1	S-locus-like receptor protein kinase, putative, expressed
LOC_Os01g48000	NA	NA	NA	NA	2.20349	3.35237e-07	3.25317	6.29895e-15	NA	NA	1	S-locus-like receptor protein kinase, putative, expressed
LOC_Os01g48020	2.34303	0.000503678	3.76212	7.23941e-11	2.87623	1.11525e-06	3.59567	8.36609e-11	2.91652	4.53494e-07	1	S-locus-like receptor protein kinase, putative, expressed
LOC_Os01g48500	NA	NA	NA	NA	NA	NA	2.23834	2.00426e-13	NA	NA	1	expressed protein
LOC_Os01g48640	NA	NA	NA	NA	NA	NA	NA	NA	-2.66864	1.16085e-10	3	expressed protein
LOC_Os01g48874	NA	NA	NA	NA	NA	NA	2.91713	1.11244e-77	NA	NA	1	wax synthase, putative, expressed
LOC_Os01g48940	NA	NA	NA	NA	NA	NA	NA	NA	2.16807	0.00508099	1	expressed protein
LOC_Os01g49280	NA	NA	NA	NA	NA	NA	-2.82063	2.07723e-08	NA	NA	3	zinc finger family protein, putative, expressed
LOC_Os01g49310	NA	NA	NA	NA	NA	NA	3.21423	4.03838e-113	3.61856	4.61494e-142	1	expressed protein
LOC_Os01g49560	NA	NA	NA	NA	NA	NA	-2.76828	0.00045349	NA	NA	3	expressed protein
LOC_Os01g49830	NA	NA	NA	NA	NA	NA	NA	NA	-2.21844	5.72443e-13	3	B3 DNA binding domain containing protein, expressed
LOC_Os01g50020	NA	NA	NA	NA	NA	NA	2.09776	0.000170388	NA	NA	1	expressed protein
LOC_Os01g50100	2.01648	5.23331e-06	NA	NA	NA	NA	NA	NA	NA	NA	1	ABC transporter, ATP-binding protein, putative, expressed
LOC_Os01g50350	7.12661	2.52137e-26	4.99634	9.07094e-09	NA	NA	NA	NA	NA	NA	1	expressed protein
LOC_Os01g50400	4.2573	2.92991e-15	3.59852	1.43396e-08	4.0813	1.14263e-13	4.06903	2.0112e-14	NA	NA	1	STE_MEKK_ste11_MAP3K.5 - STE kinases include homologs to sterile 7, sterile 11 and sterile 20 from yeast, expressed
LOC_Os01g50410	6.04673	2.51203e-41	4.17365	7.52503e-19	3.7422	4.79108e-15	3.7891	3.42971e-16	NA	NA	1	STE_MEKK_ste11_MAP3K.6 - STE kinases include homologs to sterile 7, sterile 11 and sterile 20 from yeast, expressed
LOC_Os01g50420	8.55266	2.7609e-70	6.02065	1.9154e-25	6.30661	7.44833e-30	6.44893	3.31362e-33	NA	NA	2	STE_MEKK_ste11_MAP3K.7 - STE kinases include homologs to sterile 7, sterile 11 and sterile 20 from yeast, expressed
LOC_Os01g50460	NA	NA	NA	NA	NA	NA	-2.10451	3.19759e-49	NA	NA	3	nodulin MtN3 family protein, putative, expressed
LOC_Os01g50616	NA	NA	NA	NA	NA	NA	2.38475	7.18986e-43	NA	NA	1	phosphatidylinositol transfer, putative, expressed
LOC_Os01g50622	NA	NA	NA	NA	2.18843	3.52193e-30	6.63199	2.13951e-234	6.37816	4.33306e-221	1	DNA-binding protein DSP1, putative, expressed
LOC_Os01g50940	3.39189	2.27475e-09	2.06677	0.00141149	NA	NA	NA	NA	NA	NA	1	helix-loop-helix DNA-binding domain containing protein, expressed
LOC_Os01g51410	NA	NA	NA	NA	NA	NA	-2.68671	2.93554e-52	NA	NA	3	glycine dehydrogenase, putative, expressed
LOC_Os01g51570	NA	NA	NA	NA	NA	NA	2.35498	8.21397e-07	NA	NA	1	glycosyl hydrolases family 17, putative, expressed
LOC_Os01g51670	4.8088	7.61229e-38	3.4338	2.80189e-19	3.12853	2.61609e-16	3.26264	2.09382e-18	NA	NA	1	expressed protein
LOC_Os01g51690	8.00519	3.59375e-13	7.72143	2.79665e-12	9.15763	2.42835e-21	9.69584	2.17176e-25	NA	NA	2	WRKY26, expressed
LOC_Os01g51980	NA	NA	NA	NA	NA	NA	NA	NA	-2.44279	3.53863e-09	1	alliin lyase precursor, putative, expressed
LOC_Os01g52170	NA	NA	NA	NA	NA	NA	-2.47027	1.77308e-41	NA	NA	3	expressed protein
LOC_Os01g52240	NA	NA	NA	NA	NA	NA	NA	NA	-6.15984	0.0151461	3	chlorophyll A-B binding protein, putative, expressed
LOC_Os01g52320	NA	NA	2.37881	0.000965409	3.7634	7.16981e-11	3.58285	3.09494e-10	2.67441	1.55844e-05	1	NB-ARC domain containing protein, expressed
LOC_Os01g52530	2.44665	1.24709e-14	4.21451	2.07257e-40	4.24624	3.42752e-41	3.43125	7.16481e-29	NA	NA	1	phosphoribosyl transferase, putative, expressed
LOC_Os01g52610	NA	NA	NA	NA	NA	NA	NA	NA	2.24701	3.4191e-05	1	membrane associated DUF588 domain containing protein, putative, expressed
LOC_Os01g52710	NA	NA	NA	NA	3.1238	1.62312e-06	3.97967	4.04606e-12	2.34803	0.00113999	1	glycosyl transferase 8 domain containing protein, putative, expressed
LOC_Os01g52730	3.82161	3.47863e-17	3.29237	1.54002e-11	2.48133	2.39761e-06	2.27068	9.35515e-06	NA	NA	1	DUF584 domain containing protein, putative, expressed
LOC_Os01g53020	NA	NA	NA	NA	NA	NA	NA	NA	-3.52765	6.03293e-80	3	heat shock protein DnaJ, putative, expressed
LOC_Os01g53220	NA	NA	NA	NA	2.04675	0.00237203	6.14958	3.40303e-40	4.71159	2.35857e-23	1	HSF-type DNA-binding domain containing protein, expressed
LOC_Os01g53240	NA	NA	NA	NA	NA	NA	-2.37488	3.98841e-05	-3.5776	1.10243e-08	3	BURP domain containing protein, expressed
LOC_Os01g53370	NA	NA	NA	NA	NA	NA	NA	NA	3.15908	0.000604673	3	anthocyanidin 5,3-O-glucosyltransferase, putative, expressed
LOC_Os01g53920	3.49905	4.19442e-29	2.82707	1.85138e-19	2.33809	9.60887e-14	2.69017	1.68801e-18	NA	NA	1	receptor-like protein kinase 5 precursor, putative, expressed
LOC_Os01g55160	NA	NA	NA	NA	NA	NA	NA	NA	-2.24343	0.00202516	3	expressed protein
LOC_Os01g55240	NA	NA	NA	NA	NA	NA	NA	NA	-2.29225	4.67104e-23	1	gibberellin 2-beta-dioxygenase, putative, expressed
LOC_Os01g55340	NA	NA	NA	NA	NA	NA	NA	NA	2.55263	3.34773e-13	1	dof zinc finger domain containing protein, putative, expressed
LOC_Os01g56180	NA	NA	NA	NA	NA	NA	NA	NA	-3.4046	1.91695e-77	3	expressed protein
LOC_Os01g56240	5.68629	1.60523e-16	3.43389	0.000120782	NA	NA	NA	NA	NA	NA	1	OsSAUR2 - Auxin-responsive SAUR gene family member, expressed
LOC_Os01g56370	NA	NA	NA	NA	NA	NA	-2.14001	5.51899e-06	NA	NA	3	wax synthase, putative, expressed
LOC_Os01g56450	NA	NA	NA	NA	NA	NA	NA	NA	-2.73544	5.54693e-05	1	DUF567 domain containing protein, putative, expressed
LOC_Os01g56680	NA	NA	NA	NA	NA	NA	NA	NA	-2.02087	3.5315e-21	3	photosystem II reaction center W protein, chloroplast precursor, putative, expressed
LOC_Os01g56690	5.8279	3.35543e-31	4.83141	6.22035e-18	NA	NA	NA	NA	NA	NA	1	helix-loop-helix DNA-binding domain containing protein, expressed
LOC_Os01g57510	NA	NA	2.15573	0.010345	NA	NA	NA	NA	NA	NA	1	receptor protein kinase, putative, expressed
LOC_Os01g57560	NA	NA	NA	NA	NA	NA	2.32822	8.98572e-11	NA	NA	1	serine/threonine-protein kinase receptor precursor, putative, expressed
LOC_Os01g58020	NA	NA	NA	NA	NA	NA	NA	NA	-3.14213	2.05202e-05	3	ribulose bisphosphate carboxylase large chain precursor, putative, expressed
LOC_Os01g58100	NA	NA	NA	NA	NA	NA	-7.2906	0.00247395	NA	NA	3	polyphenol oxidase, putative, expressed
LOC_Os01g58130	NA	NA	NA	NA	2.79619	0.00102866	3.23803	1.80196e-05	2.65735	0.00185615	1	expressed protein
LOC_Os01g58240	NA	NA	NA	NA	NA	NA	NA	NA	2.08241	6.31016e-07	1	OsSub6 - Putative Subtilisin homologue, expressed
LOC_Os01g58290	NA	NA	NA	NA	NA	NA	NA	NA	2.08676	9.44873e-05	1	OsSub9 - Putative Subtilisin homologue, expressed
LOC_Os01g58350	NA	NA	NA	NA	NA	NA	5.63876	0.000881514	NA	NA	1	expressed protein
LOC_Os01g58640	NA	NA	NA	NA	NA	NA	-2.12502	3.43807e-12	NA	NA	3	nucleotide pyrophosphatase/phosphodiesterase, putative, expressed
LOC_Os01g58670	NA	NA	NA	NA	NA	NA	NA	NA	-2.55073	0.0113375	3	expressed protein
LOC_Os01g58910	NA	NA	NA	NA	NA	NA	NA	NA	-2.04853	0.00016357	3	auxin-induced protein 5NG4, putative, expressed
LOC_Os01g60020	3.8236	3.80569e-47	3.15273	1.87555e-32	3.55758	3.75058e-41	3.53191	1.36528e-41	NA	NA	1	NAC domain transcription factor, putative, expressed
LOC_Os01g60450	NA	NA	NA	NA	NA	NA	-2.56109	1.57016e-12	-4.49859	1.67036e-24	3	cytochrome P450, putative, expressed
LOC_Os01g60490	4.40643	0.00333769	NA	NA	3.90155	0.00980203	NA	NA	NA	NA	1	WRKY22, expressed
LOC_Os01g60600	6.31852	1.25431e-32	4.11345	1.18855e-10	4.2422	3.85615e-12	3.67147	1.06114e-08	NA	NA	1	WRKY108, expressed
LOC_Os01g60640	4.66964	2.32675e-18	3.15182	1.67765e-08	3.07016	2.07809e-08	2.16651	0.000146865	NA	NA	1	WRKY21, expressed
LOC_Os01g60730	NA	NA	NA	NA	2.78429	1.31245e-20	5.03059	7.28353e-69	NA	NA	1	RING-H2 finger protein, putative, expressed
LOC_Os01g60770	NA	NA	NA	NA	NA	NA	NA	NA	4.21186	7.1877e-21	1	expansin precursor, putative, expressed
LOC_Os01g60830	NA	NA	NA	NA	-2.5715	2.36116e-19	-5.65077	1.15734e-66	NA	NA	3	expressed protein
LOC_Os01g61080	4.65964	4.20655e-55	3.66144	2.01751e-35	2.36396	1.9619e-15	2.81947	1.42903e-22	NA	NA	1	WRKY24, expressed
LOC_Os01g61120	NA	NA	NA	NA	NA	NA	-2.77393	3.15223e-33	-3.01369	1.00663e-37	3	expressed protein
LOC_Os01g61160	NA	NA	NA	NA	NA	NA	NA	NA	2.67002	0.000618442	1	laccase precursor protein, putative, expressed
LOC_Os01g61690	2.89073	2.29776e-11	NA	NA	NA	NA	NA	NA	NA	NA	1	OsSCP5 - Putative Serine Carboxypeptidase homologue, expressed
LOC_Os01g61700	NA	NA	NA	NA	NA	NA	-2.10999	4.16895e-06	NA	NA	3	ATP-dependent Clp protease adaptor protein ClpS containing protein, expressed
LOC_Os01g61940	NA	NA	NA	NA	NA	NA	NA	NA	2.99088	9.16851e-05	1	white-brown complex homolog protein, putative, expressed
LOC_Os01g61990	NA	NA	2.01462	4.63853e-18	NA	NA	NA	NA	NA	NA	1	ankyrin repeat-containing protein, putative, expressed
LOC_Os01g62190	4.2349	2.29504e-05	NA	NA	NA	NA	3.27734	0.00152598	NA	NA	1	ZOS1-15 - C2H2 zinc finger protein, expressed
LOC_Os01g62200	NA	NA	NA	NA	NA	NA	-3.73035	0.00194275	NA	NA	3	domain of unknown function DUF966 domain containing protein, expressed
LOC_Os01g62430	4.79901	1.28414e-43	3.28964	5.40719e-21	2.10868	8.54985e-09	2.42562	2.95365e-12	NA	NA	1	C2 domain containing protein, putative, expressed
LOC_Os01g62670	2.93347	1.19313e-12	2.01594	2.12011e-05	NA	NA	NA	NA	NA	NA	1	avr9/Cf-9 rapidly elicited protein, putative, expressed
LOC_Os01g62760	NA	NA	NA	NA	NA	NA	-2.65411	1.74036e-13	-2.22646	7.41264e-10	3	protein phosphatase 2C, putative, expressed
LOC_Os01g62770	NA	NA	NA	NA	NA	NA	-2.80879	0.00317808	-2.89561	0.00236256	3	expressed protein
LOC_Os01g62810	NA	NA	NA	NA	NA	NA	-3.80827	4.6353e-122	-6.81916	3.27044e-212	3	regulator of chromosome condensation, putative, expressed
LOC_Os01g62830	NA	NA	NA	NA	NA	NA	NA	NA	5.26944	0.00713284	1	expressed protein
LOC_Os01g62970	NA	NA	2.41117	3.08629e-45	NA	NA	NA	NA	NA	NA	1	expressed protein
LOC_Os01g62980	NA	NA	NA	NA	NA	NA	-2.16933	0.000924338	-4.23781	1.01118e-10	3	LTPL101 - Protease inhibitor/seed storage/LTP family protein precursor, expressed
LOC_Os01g63210	NA	NA	NA	NA	-2.13673	5.41339e-16	-2.30072	3.69934e-19	NA	NA	3	SOUL heme-binding protein, putative, expressed
LOC_Os01g63690	2.66222	2.68744e-09	2.65816	6.79719e-09	2.64701	2.21346e-09	2.92107	3.7098e-12	NA	NA	1	hs1, putative, expressed
LOC_Os01g63930	2.01018	6.23449e-07	NA	NA	NA	NA	NA	NA	NA	NA	1	cytochrome P450, putative, expressed
LOC_Os01g64110	NA	NA	2.12433	5.51777e-12	2.15162	1.38395e-12	NA	NA	NA	NA	1	glycosyl hydrolase, putative, expressed
LOC_Os01g64310	3.79367	6.35364e-17	2.21545	0.000203769	NA	NA	NA	NA	NA	NA	1	no apical meristem protein, putative, expressed
LOC_Os01g64450	NA	NA	2.87063	0.044053	NA	NA	NA	NA	NA	NA	1	harpin-induced protein 1 domain containing protein, expressed
LOC_Os01g64470	5.21278	1.3286e-43	3.48858	3.51744e-19	2.3533	1.03331e-08	2.83372	2.3333e-13	NA	NA	1	harpin-induced protein 1 domain containing protein, expressed
LOC_Os01g64570	4.7953	3.65598e-05	NA	NA	NA	NA	NA	NA	NA	NA	1	U-box domain-containing protein, putative, expressed
LOC_Os01g64960	NA	NA	NA	NA	NA	NA	-2.84757	3.33893e-14	-2.87797	2.67764e-14	3	chlorophyll A-B binding protein, putative, expressed
LOC_Os01g65110	NA	NA	NA	NA	NA	NA	NA	NA	-2.32429	8.11646e-10	3	POT family protein, expressed
LOC_Os01g65130	NA	NA	NA	NA	NA	NA	6.35733	1.60249e-73	5.68672	8.11002e-57	1	peptide transporter, putative, expressed
LOC_Os01g65140	NA	NA	NA	NA	5.79286	0.000437455	10.3435	1.29905e-36	9.61202	2.04048e-27	2	peptide transporter PTR2, putative, expressed
LOC_Os01g65150	NA	NA	NA	NA	NA	NA	2.40723	2.87669e-06	2.07265	0.000274763	1	proton-dependent oligopeptide transport, putative, expressed
LOC_Os01g65169	NA	NA	NA	NA	2.97881	1.48114e-16	5.51831	7.76931e-51	3.20324	1.54051e-19	1	proton-dependent oligopeptide transport, putative, expressed
LOC_Os01g65630	NA	NA	NA	NA	NA	NA	NA	NA	-2.74547	4.14673e-10	1	expressed protein
LOC_Os01g65670	NA	NA	NA	NA	NA	NA	NA	NA	-2.40372	0.000122767	3	amino acid transporter, putative, expressed
LOC_Os01g65700	NA	NA	NA	NA	NA	NA	NA	NA	2.12936	0.00356083	1	expressed protein
LOC_Os01g65840	NA	NA	NA	NA	NA	NA	2.09636	4.79742e-11	NA	NA	1	pentatricopeptide, putative, expressed
LOC_Os01g65880	NA	NA	NA	NA	NA	NA	NA	NA	-2.02801	0.000100883	3	nodulin MtN3 family protein, putative, expressed
LOC_Os01g66100	NA	NA	NA	NA	NA	NA	-2.1678	2.78488e-08	-3.51623	6.91772e-19	3	gibberellin 20 oxidase 2, putative, expressed
LOC_Os01g66250	2.4537	0.00793626	NA	NA	NA	NA	2.76107	0.00011963	NA	NA	1	S-locus-like receptor protein kinase, putative, expressed
LOC_Os01g66640	NA	NA	NA	NA	NA	NA	NA	NA	3.06964	0.00122102	1	S-domain receptor-like protein kinase, putative, expressed
LOC_Os01g66850	NA	NA	NA	NA	NA	NA	-3.1865	4.02117e-99	-2.1373	2.0988e-51	3	pectinacetylesterase domain containing protein, expressed
LOC_Os01g66860	2.37025	1.56929e-10	NA	NA	NA	NA	NA	NA	NA	NA	1	serine/threonine protein kinase, putative, expressed
LOC_Os01g66900	NA	NA	2.41494	0.0112197	NA	NA	NA	NA	NA	NA	1	expressed protein
LOC_Os01g67120	NA	NA	NA	NA	NA	NA	-2.48673	1.37404e-46	-2.26026	5.32646e-39	3	rhodanese-like domain containing protein, putative, expressed
LOC_Os01g67320	NA	NA	NA	NA	NA	NA	-3.41812	3.532e-08	-3.62489	3.40004e-08	3	expressed protein
LOC_Os01g67630	NA	NA	NA	NA	-2.02841	0.00235484	-2.21302	0.000193776	NA	NA	3	peptide transporter PTR2, putative, expressed
LOC_Os01g67810	3.05032	2.91589e-25	NA	NA	NA	NA	NA	NA	NA	NA	1	transposon protein, putative, unclassified, expressed
LOC_Os01g67820	4.01922	1.30102e-15	NA	NA	NA	NA	NA	NA	NA	NA	1	exo70 exocyst complex subunit domain containing protein, expressed
LOC_Os01g67950	NA	NA	NA	NA	NA	NA	NA	NA	2.38493	0.00144555	1	ubiquitin family protein, putative, expressed
LOC_Os01g68179	NA	NA	NA	NA	NA	NA	3.2593	0.00424808	NA	NA	1	expressed protein
LOC_Os01g68460	NA	NA	NA	NA	NA	NA	NA	NA	3.83706	8.21943e-12	1	DC1, putative, expressed
LOC_Os01g68650	2.17351	0.00935333	NA	NA	NA	NA	NA	NA	-3.57364	0.000126675	1	plant-specific domain TIGR01615 family protein, expressed
LOC_Os01g68790	NA	NA	NA	NA	NA	NA	2.5901	1.46679e-44	NA	NA	1	RNA recognition motif containing protein, putative, expressed
LOC_Os01g68960	NA	NA	NA	NA	NA	NA	-2.2723	5.93232e-07	NA	NA	3	expressed protein
LOC_Os01g69200	NA	NA	NA	NA	NA	NA	-2.19686	1.1812e-06	NA	NA	3	regulatory protein, putative, expressed
LOC_Os01g69840	NA	NA	NA	NA	3.60299	1.98571e-12	6.53137	3.84001e-42	NA	NA	1	expressed protein
LOC_Os01g70080	NA	NA	2.04993	3.82175e-13	NA	NA	2.23712	9.65591e-17	NA	NA	1	NB-ARC domain containing protein, expressed
LOC_Os01g70240	NA	NA	NA	NA	NA	NA	NA	NA	2.12391	6.6903e-06	1	expressed protein
LOC_Os01g70360	NA	NA	NA	NA	5.56295	0.00183428	6.1094	0.000250534	5.68231	0.00074582	1	serine palmitoyltransferase 2, putative, expressed
LOC_Os01g70490	NA	NA	NA	NA	NA	NA	2.27973	9.30317e-15	2.95247	2.38907e-23	1	potassium transporter, putative, expressed
LOC_Os01g70850	NA	NA	NA	NA	NA	NA	NA	NA	2.48087	4.16858e-14	1	esterase, putative, expressed
LOC_Os01g71190	NA	NA	NA	NA	-2.45439	9.23183e-19	-2.6359	3.35372e-22	NA	NA	3	photosystem II reaction center PSB28 protein, chloroplast precursor, putative, expressed
LOC_Os01g71340	NA	NA	NA	NA	NA	NA	2.65337	2.43764e-07	NA	NA	1	glycosyl hydrolases family 17, putative, expressed
LOC_Os01g71474	NA	NA	NA	NA	NA	NA	NA	NA	2.6494	4.90324e-05	1	glycosyl hydrolases family 17, putative, expressed
LOC_Os01g71710	NA	NA	NA	NA	NA	NA	2.85367	2.66567e-11	NA	NA	1	amino acid permease family protein, putative, expressed
LOC_Os01g71720	NA	NA	NA	NA	NA	NA	2.04518	1.01737e-25	NA	NA	1	amino acid permease family protein, putative, expressed
LOC_Os01g71860	NA	NA	3.63033	2.9624e-06	3.15373	5.60698e-05	2.90963	9.76567e-05	NA	NA	1	glycosyl hydrolases family 17, putative, expressed
LOC_Os01g72150	NA	NA	NA	NA	2.78907	7.67624e-06	3.9481	7.29385e-16	3.24535	2.1539e-09	1	glutathione S-transferase, putative, expressed
LOC_Os01g72330	NA	NA	NA	NA	NA	NA	2.09945	6.50726e-06	NA	NA	1	OsRR4 type-A response regulator, expressed
LOC_Os01g72360	5.41884	2.85744e-36	4.07235	3.71328e-15	2.8539	3.76355e-06	2.32397	0.000736579	NA	NA	1	expressed protein
LOC_Os01g72370	NA	NA	NA	NA	NA	NA	NA	NA	-2.42775	6.81339e-06	3	helix-loop-helix DNA-binding domain containing protein, expressed
LOC_Os01g72530	4.95965	1.88326e-41	3.08794	1.60074e-16	2.32261	1.49997e-09	2.56779	3.12522e-12	NA	NA	1	OsCML31 - Calmodulin-related calcium sensor protein, expressed
LOC_Os01g73170	NA	NA	NA	NA	NA	NA	2.1184	5.2692e-06	2.2027	2.69493e-06	1	peroxidase precursor, putative, expressed
LOC_Os01g73390	NA	NA	NA	NA	NA	NA	5.83354	0.000120475	NA	NA	2	expressed protein
LOC_Os01g74020	NA	NA	NA	NA	NA	NA	6.18877	1.14103e-98	5.3803	4.87756e-77	1	MYB family transcription factor, putative, expressed
LOC_Os01g74160	NA	NA	NA	NA	NA	NA	NA	NA	-3.10303	0.00214217	3	carboxyl-terminal peptidase, putative, expressed
LOC_Os01g74370	4.88063	2.80947e-32	4.24825	1.31348e-23	2.49362	5.21659e-08	2.87958	1.45108e-11	NA	NA	1	domain of unknown function DUF966 domain containing protein, expressed
LOC_Os01g74450	NA	NA	NA	NA	NA	NA	-4.78145	2.6564e-26	-6.09131	2.23123e-37	3	aquaporin protein, putative, expressed
LOC_Os02g01340	NA	NA	NA	NA	NA	NA	-2.2907	5.27451e-37	NA	NA	3	ferredoxin--NADP reductase, chloroplast precursor, putative, expressed
LOC_Os02g01590	NA	NA	NA	NA	-3.1863	6.31845e-05	-5.50533	7.05365e-12	-2.67978	0.00069006	3	glycosyl hydrolases, putative, expressed
LOC_Os02g02000	NA	NA	NA	NA	-2.03262	0.00967708	-2.73964	9.35691e-05	-2.52068	0.000444874	3	cytochrome P450, putative, expressed
LOC_Os02g02380	NA	NA	NA	NA	NA	NA	-3.65238	0.00184319	-3.69045	0.00221763	3	suppressor of phythchrome A, putative, expressed
LOC_Os02g02540	NA	NA	NA	NA	NA	NA	-2.08412	0.000329514	NA	NA	3	glutamate receptor, putative, expressed
LOC_Os02g02930	3.48402	3.99151e-06	5.82818	8.17469e-15	3.52891	1.35321e-06	NA	NA	NA	NA	1	terpene synthase, putative, expressed
LOC_Os02g02970	NA	NA	NA	NA	NA	NA	NA	NA	2.2307	6.91972e-22	1	expressed protein
LOC_Os02g03130	NA	NA	NA	NA	NA	NA	NA	NA	5.12132	0.0106713	1	expressed protein
LOC_Os02g03310	NA	NA	NA	NA	NA	NA	2.55022	0.00370985	NA	NA	1	KH domain containing protein, putative, expressed
LOC_Os02g03410	2.82542	3.8696e-58	NA	NA	NA	NA	NA	NA	NA	NA	1	CAMK_CAMK_like.12 - CAMK includes calcium/calmodulin depedent protein kinases, expressed
LOC_Os02g04130	2.04256	1.21612e-06	NA	NA	NA	NA	NA	NA	NA	NA	1	DUF1645 domain containing protein, putative, expressed
LOC_Os02g04240	NA	NA	NA	NA	NA	NA	2.28643	3.95267e-05	NA	NA	1	wee1-like protein kinase, putative, expressed
LOC_Os02g04369	NA	NA	NA	NA	NA	NA	-2.79002	2.49731e-27	NA	NA	3	expressed protein
LOC_Os02g04510	NA	NA	NA	NA	NA	NA	-3.31132	3.83841e-82	NA	NA	3	UOS1, putative, expressed
LOC_Os02g05830	NA	NA	NA	NA	4.87365	0.0402826	6.2743	7.50393e-05	NA	NA	2	ribulose bisphosphate carboxylase small chain, chloroplast precursor, putative, expressed
LOC_Os02g05920	NA	NA	NA	NA	NA	NA	-2.31905	3.87104e-07	-2.72113	3.02557e-09	3	phytosulfokine receptor precursor, putative, expressed
LOC_Os02g05930	2.01014	7.2975e-06	2.22348	3.31271e-07	NA	NA	NA	NA	NA	NA	1	phytosulfokine receptor precursor, putative, expressed
LOC_Os02g05950	NA	NA	NA	NA	NA	NA	NA	NA	2.40181	0.00133917	1	phytosulfokine receptor precursor, putative, expressed
LOC_Os02g05970	NA	NA	NA	NA	NA	NA	2.70414	1.44653e-12	2.78436	2.27311e-13	1	phytosulfokine receptor precursor, putative, expressed
LOC_Os02g06070	NA	NA	NA	NA	2.24718	0.00692157	2.43305	0.00114029	NA	NA	1	phytosulfokine receptor precursor, putative, expressed
LOC_Os02g06090	4.92846	4.0658e-11	4.49953	5.34448e-08	3.32354	0.00201205	NA	NA	NA	NA	1	phytosulfokine receptor precursor, putative, expressed
LOC_Os02g06130	NA	NA	2.4069	0.000363851	NA	NA	NA	NA	NA	NA	1	phytosulfokine receptor precursor, putative, expressed
LOC_Os02g06340	NA	NA	-2.30058	0.0483775	NA	NA	NA	NA	NA	NA	3	EH domain-containing protein 1, putative, expressed
LOC_Os02g06400	NA	NA	NA	NA	NA	NA	NA	NA	2.21335	1.92881e-07	1	growth regulator related protein, putative, expressed
LOC_Os02g06930	2.65926	1.14215e-52	NA	NA	NA	NA	NA	NA	NA	NA	1	protein kinase, putative, expressed
LOC_Os02g07170	NA	NA	NA	NA	3.15053	0.000198797	3.52071	4.37016e-06	3.44213	9.58734e-06	1	MYB family transcription factor, putative, expressed
LOC_Os02g08270	5.31338	1.30121e-14	3.25743	0.00118358	NA	NA	NA	NA	NA	NA	1	class I glutamine amidotransferase, putative, expressed
LOC_Os02g08440	2.00693	3.44762e-34	NA	NA	NA	NA	NA	NA	NA	NA	1	WRKY71, expressed
LOC_Os02g09220	NA	NA	NA	NA	NA	NA	NA	NA	2.48609	9.1017e-16	1	cytochrome P450, putative, expressed
LOC_Os02g09480	NA	NA	NA	NA	NA	NA	NA	NA	-2.45303	3.24331e-09	3	myb-like DNA-binding domain containing protein, putative, expressed
LOC_Os02g09610	NA	NA	NA	NA	NA	NA	NA	NA	2.24569	0.000129138	1	GDSL-like lipase/acylhydrolase, putative, expressed
LOC_Os02g09930	NA	NA	NA	NA	NA	NA	3.33603	8.58035e-17	NA	NA	1	CSLA1 - cellulose synthase-like family A; mannan synthase, expressed
LOC_Os02g09980	NA	NA	3.81712	0.0203268	NA	NA	3.77504	0.004152	3.56486	0.00480271	1	expressed protein
LOC_Os02g10120	NA	NA	NA	NA	NA	NA	-3.48693	7.69563e-10	-7.6818	2.59847e-31	3	lipoxygenase, putative, expressed
LOC_Os02g10350	NA	NA	NA	NA	NA	NA	-2.028	1.68829e-31	NA	NA	3	MLO domain containing protein, putative, expressed
LOC_Os02g10390	NA	NA	NA	NA	NA	NA	-2.31733	5.39674e-22	-12.0415	5.58949e-241	3	chlorophyll A-B binding protein, putative, expressed
LOC_Os02g10520	NA	NA	NA	NA	NA	NA	NA	NA	2.03474	1.26977e-06	1	OsSub12 - Putative Subtilisin homologue, expressed
LOC_Os02g10860	NA	NA	NA	NA	NA	NA	NA	NA	3.12819	4.80631e-22	1	bZIP transcription factor domain containing protein, expressed
LOC_Os02g10990	NA	NA	NA	NA	NA	NA	NA	NA	2.7298	3.47569e-21	1	FAD binding domain of DNA photolyase domain containing protein, expressed
LOC_Os02g11020	NA	NA	NA	NA	NA	NA	2.01895	0.00364537	2.37852	0.000225831	1	cytochrome P450 72A1, putative, expressed
LOC_Os02g11070	5.06637	1.07224e-33	3.1307	8.77383e-15	2.70574	1.73478e-11	2.87182	2.79049e-13	NA	NA	1	3-ketoacyl-CoA synthase, putative, expressed
LOC_Os02g11640	NA	NA	NA	NA	-2.10325	5.31484e-09	-3.6976	1.68549e-24	-2.21484	3.47815e-10	3	UDP-glucoronosyl and UDP-glucosyl transferase, putative, expressed
LOC_Os02g11740	NA	NA	NA	NA	NA	NA	2.24202	4.06322e-34	2.10498	3.05653e-30	1	plastidic ATP/ADP-transporter, putative, expressed
LOC_Os02g11760	NA	NA	NA	NA	NA	NA	2.13463	4.84426e-12	NA	NA	1	pleiotropic drug resistance protein, putative, expressed
LOC_Os02g11770	NA	NA	NA	NA	NA	NA	-3.76306	9.46462e-12	-2.38354	1.6019e-05	3	expressed protein
LOC_Os02g11859	4.27179	5.41752e-53	4.25373	7.66007e-52	3.16001	4.43344e-30	3.11124	4.398e-30	NA	NA	1	expressed protein
LOC_Os02g11870	2.73122	0.00030539	2.87116	7.86191e-05	2.01689	0.0140224	2.25843	0.00154689	NA	NA	1	expressed protein
LOC_Os02g11980	2.11595	8.77665e-05	2.78976	7.60978e-09	NA	NA	NA	NA	NA	NA	1	receptor-like protein kinase precursor, putative, expressed
LOC_Os02g12400	NA	NA	NA	NA	NA	NA	NA	NA	2.43334	6.63761e-05	1	receptor-like protein kinase precursor, putative, expressed
LOC_Os02g12820	NA	NA	4.06537	0.000214341	4.17243	8.07217e-05	4.16758	1.19226e-05	NA	NA	1	helix-loop-helix DNA-binding domain containing protein, expressed
LOC_Os02g13220	5.61245	2.34341e-16	2.94449	0.0305031	NA	NA	NA	NA	NA	NA	1	F-box family protein, putative, expressed
LOC_Os02g13260	8.31745	4.75004e-20	7.19111	9.34504e-11	5.78792	0.000295319	7.19894	2.70994e-10	6.12951	0.000206112	2	F-box family protein, putative, expressed
LOC_Os02g13780	NA	NA	2.4061	0.00011189	NA	NA	NA	NA	NA	NA	1	receptor-like protein kinase 2 precursor, putative, expressed
LOC_Os02g13800	NA	NA	NA	NA	NA	NA	-2.61712	7.49257e-07	NA	NA	3	HSF-type DNA-binding domain containing protein, expressed
LOC_Os02g14430	NA	NA	5.78047	8.48152e-17	5.88445	7.93219e-18	5.84032	4.50522e-18	5.23053	1.98583e-14	2	peroxidase precursor, putative, expressed
LOC_Os02g14440	NA	NA	3.18731	1.94306e-12	3.54621	3.74519e-15	5.35537	2.59816e-30	5.14257	2.18018e-28	1	peroxidase precursor, putative, expressed
LOC_Os02g15110	NA	NA	NA	NA	NA	NA	3.96511	8.52232e-11	NA	NA	1	zinc finger, C3HC4 type domain containing protein, expressed
LOC_Os02g15120	NA	NA	NA	NA	NA	NA	2.5049	4.00851e-12	NA	NA	1	RING-H2 finger protein, putative, expressed
LOC_Os02g15280	2.52111	1.91739e-07	2.89332	7.1626e-10	NA	NA	NA	NA	NA	NA	1	VQ domain containing protein, putative, expressed
LOC_Os02g15290	6.48119	8.71666e-25	5.11934	7.57721e-14	2.67273	0.00306836	3.37408	5.78471e-06	NA	NA	1	VQ domain containing protein, putative, expressed
LOC_Os02g15750	NA	NA	NA	NA	NA	NA	-2.95694	3.3114e-11	-3.4413	3.48161e-14	3	expressed protein
LOC_Os02g15860	NA	NA	NA	NA	-2.01026	0.000526019	-3.55196	2.30672e-10	-3.62079	5.61351e-11	3	expressed protein
LOC_Os02g15930	NA	NA	NA	NA	NA	NA	-2.95421	4.66728e-18	-2.32016	7.58054e-13	3	expressed protein
LOC_Os02g16070	NA	NA	NA	NA	NA	NA	NA	NA	2.20765	0.000522199	1	lr1 disease resistance protein, putative, expressed
LOC_Os02g16540	2.02958	6.39877e-12	NA	NA	NA	NA	NA	NA	NA	NA	1	WRKY39, expressed
LOC_Os02g16909	NA	NA	NA	NA	NA	NA	3.62446	8.74315e-54	2.52015	1.43528e-25	1	dynein light chain type 1 domain containing protein, expressed
LOC_Os02g17000	3.61987	1.55528e-10	2.92287	1.71282e-06	NA	NA	3.34078	9.16005e-10	3.98882	2.48864e-13	1	OsSub14 - Putative Subtilisin homologue, expressed
LOC_Os02g17920	NA	NA	NA	NA	NA	NA	-2.04248	3.20629e-23	NA	NA	3	glyoxalase family protein, putative, expressed
LOC_Os02g18450	NA	NA	NA	NA	NA	NA	-2.02586	7.82396e-18	NA	NA	3	GTP-binding protein typA/bipA, putative, expressed
LOC_Os02g19550	NA	NA	NA	NA	NA	NA	3.25208	1.59977e-07	3.24469	1.84791e-07	1	lectin-like receptor kinase, putative, expressed
LOC_Os02g19650	NA	NA	NA	NA	2.30194	2.65294e-13	3.37145	5.72883e-31	NA	NA	1	hydrolase, alpha/beta fold family domain containing protein, expressed
LOC_Os02g19990	NA	NA	NA	NA	NA	NA	2.5254	2.3436e-16	NA	NA	1	reticulon domain containing protein, putative, expressed
LOC_Os02g21040	3.33296	4.32753e-25	2.27569	1.14769e-11	NA	NA	NA	NA	NA	NA	1	aspartic proteinase nepenthesin precursor, putative, expressed
LOC_Os02g21300	NA	NA	NA	NA	NA	NA	2.06555	0.00114554	NA	NA	1	transposon protein, putative, unclassified, expressed
LOC_Os02g21700	2.53619	7.62812e-07	NA	NA	NA	NA	NA	NA	NA	NA	1	STE_MEKK_ste11_MAP3K.8 - STE kinases include homologs to sterile 7, sterile 11 and sterile 20 from yeast, expressed
LOC_Os02g21810	NA	NA	NA	NA	NA	NA	-3.0749	2.21221e-28	NA	NA	3	cytochrome P450 51, putative, expressed
LOC_Os02g22160	3.82045	1.02419e-26	3.07078	1.03553e-17	2.70353	3.68947e-14	3.19833	5.2205e-20	NA	NA	1	DNA binding protein, putative, expressed
LOC_Os02g22570	NA	NA	NA	NA	NA	NA	NA	NA	2.7448	0.00626646	1	retrotransposon protein, putative, unclassified, expressed
LOC_Os02g26210	NA	NA	NA	NA	NA	NA	-2.92426	1.12089e-11	-2.30213	1.43449e-07	3	flowering promoting factor-like 1, putative, expressed
LOC_Os02g26430	8.20537	9.88192e-15	5.06729	0.0486777	NA	NA	NA	NA	NA	NA	2	WRKY42, expressed
LOC_Os02g26770	5.95918	8.08504e-21	5.82459	1.38759e-19	5.67691	1.47828e-18	5.33709	3.98687e-16	3.16229	0.00170858	2	cytochrome P450, putative, expressed
LOC_Os02g26810	2.58883	9.87711e-19	3.21333	4.39352e-28	2.82236	3.31909e-22	2.29315	2.12003e-15	NA	NA	1	cytochrome P450, putative, expressed
LOC_Os02g27540	NA	NA	NA	NA	NA	NA	NA	NA	5.45603	1.7487e-10	1	NB-ARC domain containing protein, expressed
LOC_Os02g28310	NA	NA	NA	NA	-5.23581	0.00967836	-5.48925	0.00344045	NA	NA	3	expressed protein
LOC_Os02g29510	NA	NA	NA	NA	NA	NA	-2.22938	7.84121e-19	NA	NA	3	DUF803 domain containing, putative, expressed
LOC_Os02g30080	NA	NA	NA	NA	NA	NA	NA	NA	-2.63053	0.0115587	3	cytochrome P450, putative, expressed
LOC_Os02g30100	NA	NA	NA	NA	NA	NA	-2.54688	1.23624e-06	NA	NA	3	cytochrome P450, putative, expressed
LOC_Os02g30190	5.29423	1.37688e-11	4.41559	3.84875e-07	2.77725	0.008711	NA	NA	NA	NA	1	expressed protein
LOC_Os02g30320	NA	NA	NA	NA	NA	NA	NA	NA	-3.94293	1.92906e-110	3	drought-induced protein 1, putative, expressed
LOC_Os02g30810	NA	NA	NA	NA	NA	NA	NA	NA	2.36945	0.00215103	1	OsSAUR10 - Auxin-responsive SAUR gene family member, expressed
LOC_Os02g30910	NA	NA	NA	NA	-2.87086	0.00661773	-3.52463	0.000405405	NA	NA	3	nodulin MtN3 family protein, putative, expressed
LOC_Os02g32060	NA	NA	NA	NA	2.15144	0.00335729	3.36513	1.20982e-07	3.26577	3.97314e-07	1	hydrolase, NUDIX family, domain containing protein, expressed
LOC_Os02g32590	NA	NA	NA	NA	2.13771	3.62943e-20	2.73545	1.16559e-34	NA	NA	1	HSF-type DNA-binding domain containing protein, expressed
LOC_Os02g32770	NA	NA	NA	NA	NA	NA	5.47235	1.19246e-06	6.12217	8.00198e-09	1	cytochrome P450, putative, expressed
LOC_Os02g32970	NA	NA	2.60939	4.99655e-22	2.40405	4.52138e-19	2.61795	4.24289e-23	2.00787	7.82809e-14	1	hydrolase, alpha/beta fold family protein, putative, expressed
LOC_Os02g32990	NA	NA	NA	NA	NA	NA	NA	NA	-2.82102	6.88084e-33	3	expressed protein
LOC_Os02g33000	2.60227	2.29981e-06	NA	NA	NA	NA	NA	NA	NA	NA	1	glycosyl hydrolases family 17, putative, expressed
LOC_Os02g33580	NA	NA	NA	NA	NA	NA	NA	NA	-2.45685	5.95871e-87	3	digalactosyldiacylglycerol synthase, chloroplast precursor, putative, expressed
LOC_Os02g33590	10.1584	2.8458e-50	6.33512	6.26747e-06	6.55937	1.46241e-07	7.62101	7.97823e-14	5.097	0.00821532	2	U-box domain-containing protein, putative, expressed
LOC_Os02g33610	NA	NA	NA	NA	NA	NA	2.25405	5.78691e-50	NA	NA	1	metallo-beta-lactamase, putative, expressed
LOC_Os02g33680	2.37877	7.71412e-06	NA	NA	NA	NA	NA	NA	NA	NA	1	U-box domain containing protein, expressed
LOC_Os02g34410	2.81499	1.45445e-14	NA	NA	NA	NA	NA	NA	NA	NA	1	U-box domain-containing protein, putative, expressed
LOC_Os02g35020	NA	NA	NA	NA	3.76143	0.000247258	4.43215	8.26998e-07	3.7619	0.000240431	1	glycosyl transferase, putative, expressed
LOC_Os02g35440	NA	NA	NA	NA	NA	NA	3.16385	7.41817e-05	NA	NA	1	RING-H2 finger protein ATL4O precursor, putative, expressed
LOC_Os02g35490	2.14469	3.58336e-07	2.2922	2.69167e-08	2.64467	1.93878e-11	3.02706	1.94673e-15	NA	NA	1	MLO domain containing protein, putative, expressed
LOC_Os02g35970	NA	NA	NA	NA	NA	NA	-2.09298	8.08768e-06	NA	NA	3	BTBN2 - Bric-a-Brac, Tramtrack, Broad Complex BTB domain with non-phototropic hypocotyl 3 NPH3 and coiled-coil domains, expressed
LOC_Os02g36020	NA	NA	NA	NA	5.68891	0.00149657	7.16665	2.00103e-07	NA	NA	1	transposon protein, putative, CACTA, En/Spm sub-class, expressed
LOC_Os02g36030	NA	NA	NA	NA	NA	NA	3.88338	2.08064e-05	3.17498	0.00100515	1	cytochrome P450, putative, expressed
LOC_Os02g36070	NA	NA	NA	NA	3.90707	5.47711e-09	4.93504	4.1721e-14	3.92046	2.38839e-09	1	cytochrome P450, putative, expressed
LOC_Os02g36110	NA	NA	NA	NA	2.97855	8.35139e-10	4.60093	4.28483e-21	4.42399	1.06405e-19	1	cytochrome P450, putative, expressed
LOC_Os02g36140	NA	NA	NA	NA	2.54525	0.0094446	4.43171	6.27852e-07	3.89846	1.3392e-05	1	terpene synthase, putative, expressed
LOC_Os02g36150	NA	NA	NA	NA	NA	NA	NA	NA	-2.06751	1.50883e-09	3	cytochrome P450, putative, expressed
LOC_Os02g36190	NA	NA	NA	NA	2.27212	0.0114744	4.04547	4.24343e-07	4.00187	7.38915e-07	1	cytochrome P450, putative, expressed
LOC_Os02g36210	NA	NA	NA	NA	NA	NA	2.43695	3.18884e-05	NA	NA	1	ent-kaurene synthase, chloroplast precursor, putative, expressed
LOC_Os02g36220	NA	NA	NA	NA	NA	NA	NA	NA	-2.40347	2.02262e-08	3	terpene synthase, putative, expressed
LOC_Os02g36280	NA	NA	NA	NA	4.37862	3.98894e-18	5.38177	2.06445e-26	5.14898	2.10911e-24	1	cytochrome P450, putative, expressed
LOC_Os02g36530	4.61757	3.17932e-06	NA	NA	NA	NA	NA	NA	NA	NA	1	expressed protein
LOC_Os02g36570	NA	NA	NA	NA	NA	NA	-2.93896	3.30109e-50	NA	NA	3	ABC1 family domain containing protein, putative, expressed
LOC_Os02g36740	NA	NA	NA	NA	NA	NA	2.13293	5.9211e-25	NA	NA	1	zinc finger, C3HC4 type, putative, expressed
LOC_Os02g36770	NA	NA	NA	NA	NA	NA	2.57809	2.83591e-05	2.09154	0.00210521	1	galactosyltransferase family protein, putative, expressed
LOC_Os02g36850	NA	NA	NA	NA	2.12851	0.0410147	5.26345	5.02312e-12	4.81038	3.92371e-10	1	oxygen evolving enhancer protein 3, identical, putative, expressed
LOC_Os02g37060	NA	NA	NA	NA	NA	NA	NA	NA	-2.98521	3.45988e-12	3	photosystem II 5 kDa protein, chloroplast precursor, putative, expressed
LOC_Os02g37160	NA	NA	NA	NA	NA	NA	NA	NA	2.55304	0.00098299	1	heavy metal transport/detoxification protein, putative, expressed
LOC_Os02g37190	NA	NA	NA	NA	NA	NA	4.19408	4.83698e-10	5.53523	1.09383e-18	1	expressed protein
LOC_Os02g37320	NA	NA	2.60698	0.000414793	NA	NA	NA	NA	NA	NA	1	heavy metal associated domain containing protein, expressed
LOC_Os02g37654	NA	NA	NA	NA	NA	NA	-2.11169	7.06481e-23	NA	NA	3	lecithin:cholesterol acyltransferase, putative, expressed
LOC_Os02g37770	NA	NA	NA	NA	NA	NA	-2.29268	0.000100221	NA	NA	3	lecithin cholesterol acyltransferase, putative, expressed
LOC_Os02g37800	NA	NA	NA	NA	NA	NA	-2.08911	4.72859e-07	NA	NA	3	lecithin:cholesterol acyltransferase, putative, expressed
LOC_Os02g38020	NA	NA	NA	NA	NA	NA	-2.00257	5.69564e-24	NA	NA	3	inorganic phosphate transporter 2-1, chloroplast precursor, putative, expressed
LOC_Os02g39000	5.7167	0.00204322	NA	NA	NA	NA	NA	NA	NA	NA	1	remorin C-terminal domain containing protein, putative, expressed
LOC_Os02g40510	NA	NA	NA	NA	NA	NA	2.61438	1.17786e-59	NA	NA	1	response regulator receiver domain containing protein, expressed
LOC_Os02g40530	6.06608	0.000245114	5.50229	0.00759688	NA	NA	NA	NA	NA	NA	1	MYB family transcription factor, putative, expressed
LOC_Os02g40664	NA	NA	2.39767	5.70757e-21	NA	NA	NA	NA	NA	NA	1	zinc finger family protein, putative, expressed
LOC_Os02g40700	2.12244	1.63235e-18	2.37558	6.80571e-23	NA	NA	NA	NA	NA	NA	1	enzyme of the cupin superfamily protein, putative, expressed
LOC_Os02g41460	2.11676	0.00125542	NA	NA	NA	NA	NA	NA	2.06222	0.000277603	1	DUF640 domain containing protein, putative, expressed
LOC_Os02g41480	NA	NA	NA	NA	NA	NA	5.81518	0.000187073	6.62742	1.52905e-06	1	OsWAK12 - OsWAK receptor-like cytoplasmic kinase OsWAK-RLCK, expressed
LOC_Os02g41500	2.11545	0.00195549	2.71841	1.34428e-05	NA	NA	NA	NA	NA	NA	1	OsWAK13 - OsWAK receptor-like protein kinase, expressed
LOC_Os02g41510	4.17558	6.77472e-40	3.68402	1.24911e-30	3.2113	1.0269e-23	3.3347	2.2937e-26	NA	NA	1	MYB family transcription factor, putative, expressed
LOC_Os02g41670	3.64681	7.06138e-59	3.68866	9.67543e-60	3.37538	3.48867e-51	2.73727	1.08263e-35	NA	NA	1	phenylalanine ammonia-lyase, putative, expressed
LOC_Os02g41840	3.86446	0.000193345	NA	NA	NA	NA	NA	NA	NA	NA	1	DUF584 domain containing protein, putative, expressed
LOC_Os02g41860	NA	NA	NA	NA	-2.13094	1.60634e-06	-4.38182	1.11769e-22	-2.84356	4.10419e-11	3	aquaporin protein, putative, expressed
LOC_Os02g42110	NA	NA	NA	NA	NA	NA	NA	NA	5.98939	5.20793e-05	1	wall-associated receptor kinase-like 22 precursor, putative, expressed
LOC_Os02g42190	NA	NA	NA	NA	NA	NA	NA	NA	2.47972	6.80721e-05	1	OsWAK16 - OsWAK receptor-like protein kinase, expressed
LOC_Os02g42585	NA	NA	NA	NA	NA	NA	NA	NA	-2.18554	0.00757382	1	AP2 domain containing protein, expressed
LOC_Os02g42640	NA	NA	4.17293	0.000286364	5.11825	2.88731e-07	5.73621	6.43743e-10	NA	NA	1	CBS domain-containing protein, putative, expressed
LOC_Os02g42810	NA	NA	NA	NA	NA	NA	-2.1227	2.02692e-05	NA	NA	3	oxidoreductase, short chain dehydrogenase/reductase family domain containing protein, expressed
LOC_Os02g42880	NA	NA	NA	NA	-2.25171	2.14181e-11	-5.39648	2.28154e-34	-4.15819	6.34837e-27	3	remorin C-terminal domain containing protein, putative, expressed
LOC_Os02g42940	NA	NA	NA	NA	NA	NA	-2.2757	1.03661e-22	NA	NA	3	MSP domain containing protein, expressed
LOC_Os02g43170	NA	NA	NA	NA	NA	NA	2.89535	2.28193e-14	4.32828	9.04192e-31	1	B-box zinc finger family protein, putative, expressed
LOC_Os02g43330	NA	NA	NA	NA	NA	NA	-4.22021	4.62613e-05	-3.71094	0.000128933	3	homeobox associated leucine zipper, putative, expressed
LOC_Os02g43340	NA	NA	NA	NA	NA	NA	-2.39239	9.48346e-30	NA	NA	3	hydrolase, alpha/beta fold family domain containing protein, expressed
LOC_Os02g43370	NA	NA	NA	NA	NA	NA	NA	NA	-2.5161	2.91198e-06	3	transposon protein, putative, unclassified, expressed
LOC_Os02g43410	NA	NA	NA	NA	NA	NA	NA	NA	3.1993	6.92602e-05	1	transposon protein, putative, unclassified, expressed
LOC_Os02g43470	NA	NA	NA	NA	2.76217	0.000909371	3.57797	1.14346e-06	2.2514	0.0110453	1	glutamate dehydrogenase protein, putative, expressed
LOC_Os02g43660	NA	NA	NA	NA	NA	NA	NA	NA	2.05594	0.0047189	1	plastocyanin-like domain containing protein, putative, expressed
LOC_Os02g43790	4.23518	1.18837e-43	3.28854	6.35662e-27	2.59578	3.22576e-17	2.83066	3.91983e-21	NA	NA	1	ethylene-responsive transcription factor, putative, expressed
LOC_Os02g44130	4.05823	0.00278594	NA	NA	NA	NA	NA	NA	NA	NA	1	ZOS2-14 - C2H2 zinc finger protein, expressed
LOC_Os02g44230	3.10166	1.48937e-21	NA	NA	NA	NA	2.04538	2.46703e-10	NA	NA	1	CPuORF22 - conserved peptide uORF-containing transcript, expressed
LOC_Os02g44290	NA	NA	NA	NA	NA	NA	2.0343	3.10976e-13	NA	NA	1	phosphatase, putative, expressed
LOC_Os02g44300	NA	NA	NA	NA	2.51584	9.25287e-17	4.95242	6.19347e-65	2.90477	3.9184e-23	1	MSP domain containing protein, expressed
LOC_Os02g44470	NA	NA	NA	NA	NA	NA	2.19094	3.10236e-06	NA	NA	1	actin-depolymerizing factor, putative, expressed
LOC_Os02g44480	NA	NA	NA	NA	NA	NA	2.21272	1.76393e-18	NA	NA	1	pentatricopeptide, putative, expressed
LOC_Os02g44880	2.77659	3.85006e-27	NA	NA	NA	NA	NA	NA	NA	NA	1	expressed protein
LOC_Os02g45010	NA	NA	NA	NA	NA	NA	NA	NA	-2.90218	2.68068e-07	3	ethylene-responsive protein related, putative, expressed
LOC_Os02g45225	NA	NA	NA	NA	7.01635	4.53554e-09	11.3816	8.70549e-49	7.40665	4.08684e-10	2	expressed protein
LOC_Os02g45380	4.67363	5.92781e-06	3.83392	0.00198778	3.66213	0.00644445	4.08698	0.000134233	3.4214	0.0114296	2	MATE domain containing protein, expressed
LOC_Os02g45420	2.73893	0.000503678	NA	NA	NA	NA	NA	NA	NA	NA	1	AP2 domain containing protein, expressed
LOC_Os02g45450	4.00721	0.00616705	NA	NA	NA	NA	NA	NA	NA	NA	1	dehydration-responsive element-binding protein, putative, expressed
LOC_Os02g45710	2.58266	5.02824e-15	NA	NA	2.03088	1.81178e-09	2.07975	2.0961e-10	NA	NA	1	zinc finger, C3HC4 type domain containing protein, expressed
LOC_Os02g45780	3.80009	1.39213e-28	3.17313	3.82884e-19	3.04496	3.9752e-18	2.58695	1.98748e-13	NA	NA	1	zinc finger, C3HC4 type domain containing protein, expressed
LOC_Os02g46030	NA	NA	NA	NA	-2.49184	5.72812e-07	-3.08236	2.45817e-11	NA	NA	3	MYB family transcription factor, putative, expressed
LOC_Os02g46100	3.20401	0.0098865	NA	NA	NA	NA	NA	NA	NA	NA	1	RING-H2 finger protein, putative, expressed
LOC_Os02g46210	2.03463	0.00523237	NA	NA	NA	NA	NA	NA	NA	NA	1	DUF581 domain containing protein, expressed
LOC_Os02g46500	NA	NA	4.14019	0.00360352	NA	NA	NA	NA	NA	NA	1	U-box, putative, expressed
LOC_Os02g46680	NA	NA	2.57198	0.00117311	NA	NA	NA	NA	NA	NA	1	multidrug resistance protein, putative, expressed
LOC_Os02g46780	-2.10648	5.29482e-19	NA	NA	NA	NA	NA	NA	NA	NA	3	MYB family transcription factor, putative, expressed
LOC_Os02g46850	NA	NA	NA	NA	NA	NA	NA	NA	2.15886	1.30489e-17	1	oligopeptide transporter, putative, expressed
LOC_Os02g46860	NA	NA	NA	NA	NA	NA	NA	NA	2.2201	1.0064e-08	1	oligopeptide transporter 4, putative, expressed
LOC_Os02g46970	NA	NA	NA	NA	-2.34208	0.00420721	-2.40505	0.000790233	NA	NA	3	AMP-binding domain containing protein, expressed
LOC_Os02g46980	NA	NA	NA	NA	NA	NA	NA	NA	-5.14336	1.9635e-109	3	pentatricopeptide, putative, expressed
LOC_Os02g47020	NA	NA	NA	NA	NA	NA	-2.70596	6.86054e-32	-3.26242	4.05442e-44	3	phosphoribulokinase/Uridine kinase family protein, expressed
LOC_Os02g47090	NA	NA	4.17477	1.62727e-23	3.37626	8.82136e-16	3.76633	2.0026e-20	NA	NA	1	peptide transporter PTR2, putative, expressed
LOC_Os02g47200	NA	NA	NA	NA	NA	NA	-2.24312	6.08078e-36	NA	NA	3	transposon protein, putative, unclassified, expressed
LOC_Os02g47470	NA	NA	3.10237	1.46412e-21	3.186	3.72651e-23	3.53261	6.67445e-29	2.27676	1.75142e-12	1	cytochrome P450, putative, expressed
LOC_Os02g47510	NA	NA	NA	NA	NA	NA	NA	NA	-3.54454	1.31912e-39	3	9-cis-epoxycarotenoid dioxygenase 1, chloroplast precursor, putative, expressed
LOC_Os02g47620	NA	NA	NA	NA	-2.31007	3.5432e-17	-3.7078	1.27656e-39	NA	NA	3	hydrolase, alpha/beta fold family domain containing protein, expressed
LOC_Os02g47780	NA	NA	NA	NA	NA	NA	NA	NA	2.30462	0.000431218	1	hydrolase, alpha/beta fold family domain containing protein, expressed
LOC_Os02g48200	2.10478	0.000482429	3.54681	2.31652e-11	3.44927	2.17718e-11	4.00804	1.4403e-15	2.86073	2.32315e-08	1	lectin-like protein kinase, putative, expressed
LOC_Os02g48210	NA	NA	NA	NA	2.20273	1.64383e-22	3.11271	9.21153e-45	2.12202	1.49347e-21	1	lectin-like protein kinase, putative, expressed
LOC_Os02g48320	3.4472	2.09499e-15	3.34343	3.82158e-14	2.33138	7.66862e-07	2.43609	5.88901e-08	2.28255	6.34792e-07	1	DNA binding protein, putative, expressed
LOC_Os02g48710	NA	NA	NA	NA	2.80136	5.99511e-05	2.25266	0.00134691	NA	NA	1	expressed protein
LOC_Os02g48770	6.10178	7.62224e-11	6.67852	1.18272e-12	3.92466	4.78784e-05	NA	NA	NA	NA	1	SAM dependent carboxyl methyltransferase, putative, expressed
LOC_Os02g49230	NA	NA	NA	NA	NA	NA	2.20917	5.69155e-41	4.48023	1.05554e-153	1	CCT/B-box zinc finger protein, putative, expressed
LOC_Os02g49260	NA	NA	NA	NA	NA	NA	NA	NA	3.00419	3.78421e-09	1	transporter-related, putative, expressed
LOC_Os02g49340	NA	NA	NA	NA	NA	NA	NA	NA	-3.09024	0.0110553	3	nitrate-induced NOI protein, putative, expressed
LOC_Os02g49680	NA	NA	NA	NA	NA	NA	-3.02405	4.99632e-57	-3.92889	1.34615e-86	3	arsenate reductase, putative, expressed
LOC_Os02g49720	NA	NA	NA	NA	NA	NA	NA	NA	2.39827	4.6572e-12	1	aldehyde dehydrogenase, putative, expressed
LOC_Os02g49790	NA	NA	NA	NA	NA	NA	-3.57771	4.13747e-06	-2.88097	7.29228e-05	3	aluminum-activated malate transporter, putative, expressed
LOC_Os02g49870	NA	NA	NA	NA	NA	NA	-2.23754	1.65043e-17	-3.53646	1.73803e-38	3	expressed protein
LOC_Os02g50000	NA	NA	NA	NA	NA	NA	NA	NA	6.12794	0.000594743	1	GDSL-like lipase/acylhydrolase, putative, expressed
LOC_Os02g50110	4.28437	0.000277535	NA	NA	NA	NA	NA	NA	NA	NA	1	expressed protein
LOC_Os02g50374	3.9831	8.67997e-25	2.74252	9.34077e-10	NA	NA	NA	NA	NA	NA	1	expressed protein
LOC_Os02g50460	2.38521	0.000288255	3.30326	2.11552e-08	3.00128	3.06593e-07	3.00488	1.34374e-07	2.45535	3.70848e-05	1	immediate-early fungal elicitor protein CMPG1, putative, expressed
LOC_Os02g50600	2.84903	1.44236e-25	NA	NA	NA	NA	NA	NA	NA	NA	1	glycosyl transferase 8 domain containing protein, putative, expressed
LOC_Os02g50690	NA	NA	NA	NA	3.23149	1.5816e-07	3.09377	1.31333e-07	3.01952	3.62096e-07	1	GDSL-like lipase/acylhydrolase, putative, expressed
LOC_Os02g50820	NA	NA	NA	NA	NA	NA	NA	NA	-2.18663	0.000164028	3	nucleobase-ascorbate transporter, putative, expressed
LOC_Os02g51080	NA	NA	NA	NA	NA	NA	-2.7591	6.18302e-28	-3.87128	8.84186e-50	3	FAD binding domain containing protein, expressed
LOC_Os02g51110	NA	NA	NA	NA	NA	NA	NA	NA	-2.98399	1.48285e-22	3	aquaporin protein, putative, expressed
LOC_Os02g51370	2.94451	4.72762e-07	NA	NA	NA	NA	NA	NA	NA	NA	1	glutaredoxin, putative, expressed
LOC_Os02g51440	NA	NA	5.59512	9.98185e-08	6.41705	1.87224e-10	5.93901	4.12293e-09	3.39188	0.0071964	2	laccase precursor protein, putative, expressed
LOC_Os02g51590	NA	NA	2.81763	1.31986e-35	NA	NA	NA	NA	NA	NA	1	phosphoglycerate mutase, putative, expressed
LOC_Os02g51730	5.48446	0.00570383	NA	NA	NA	NA	NA	NA	NA	NA	1	dnaJ homolog subfamily C member 7, putative, expressed
LOC_Os02g51910	NA	NA	NA	NA	NA	NA	-2.12018	0.000210145	NA	NA	3	cytokinin-O-glucosyltransferase 2, putative, expressed
LOC_Os02g52010	2.8171	2.7146e-08	NA	NA	NA	NA	NA	NA	-3.25927	5.48314e-10	1	phosphate-induced protein 1 conserved region domain containing protein, expressed
LOC_Os02g52170	5.75298	7.63923e-10	4.83641	5.25086e-06	4.79577	1.00728e-05	4.66576	4.79866e-06	NA	NA	2	expressed protein
LOC_Os02g52650	NA	NA	NA	NA	NA	NA	-2.22458	4.09459e-23	NA	NA	3	chlorophyll A-B binding protein, putative, expressed
LOC_Os02g53100	NA	NA	NA	NA	2.60917	0.0345637	3.48795	0.000324726	3.77697	6.74575e-05	1	WRKY32, expressed
LOC_Os02g53350	NA	NA	NA	NA	NA	NA	3.85506	3.44452e-20	2.16427	4.91185e-07	1	expressed protein
LOC_Os02g53400	NA	NA	NA	NA	2.88879	6.15838e-22	5.18277	4.52949e-64	3.04268	7.9217e-25	1	thioredoxin, putative, expressed
LOC_Os02g53840	NA	NA	NA	NA	NA	NA	-3.87202	0.00412142	-6.29175	0.00090704	3	subtilisin N-terminal Region family protein, expressed
LOC_Os02g53850	NA	NA	NA	NA	NA	NA	NA	NA	-5.29433	0.00605118	3	OsSub21 - Putative Subtilisin homologue, expressed
LOC_Os02g54140	NA	NA	NA	NA	-2.78212	1.53715e-07	-4.84844	1.80642e-18	-3.33204	1.16085e-10	3	hsp20/alpha crystallin family protein, putative, expressed
LOC_Os02g54180	NA	NA	NA	NA	NA	NA	NA	NA	3.31302	1.16688e-07	1	expressed protein
LOC_Os02g55970	2.65572	8.18639e-46	2.15004	7.97731e-30	NA	NA	NA	NA	NA	NA	1	ANTH, putative, expressed
LOC_Os02g56370	NA	NA	NA	NA	2.32172	0.000737705	2.65273	4.06625e-05	NA	NA	1	OsWAK20 - OsWAK receptor-like protein kinase, expressed
LOC_Os02g56380	5.9997	4.69029e-48	4.46843	1.12456e-24	4.62393	4.44477e-27	4.66518	9.16387e-29	2.17526	4.32596e-05	2	OsWAK21 - OsWAK receptor-like cytoplasmic kinase OsWAK-RLCK, expressed
LOC_Os02g56420	NA	NA	3.5761	0.0025751	4.08669	6.39123e-05	5.14957	2.25875e-09	NA	NA	1	OsWAK23 - OsWAK short gene, expressed
LOC_Os02g56630	NA	NA	NA	NA	5.08958	0.0371733	8.06203	3.30998e-08	8.55591	1.11602e-09	2	OsWAK24 - OsWAK receptor-like protein kinase, expressed
LOC_Os02g56940	NA	NA	NA	NA	-2.13177	6.25426e-06	NA	NA	NA	NA	3	expressed protein
LOC_Os02g57020	NA	NA	NA	NA	NA	NA	-2.60279	4.28393e-11	-2.93132	2.04656e-13	3	YCF37, putative, expressed
LOC_Os02g57030	NA	NA	NA	NA	NA	NA	NA	NA	-2.86552	4.48102e-29	3	expressed protein
LOC_Os02g57060	NA	NA	NA	NA	-2.972	1.40287e-33	-4.30823	2.37301e-57	NA	NA	3	OsCttP2 - Putative C-terminal processing peptidase homologue, expressed
LOC_Os02g57790	NA	NA	NA	NA	NA	NA	-2.25506	7.13226e-12	NA	NA	3	ZOS2-19 - C2H2 zinc finger protein, expressed
LOC_Os02g57810	6.586	7.15291e-07	5.76441	0.00135363	5.84829	0.000251715	6.47172	1.08387e-05	NA	NA	2	cytochrome P450, putative, expressed
LOC_Os02g57840	NA	NA	NA	NA	NA	NA	-2.07263	0.00454536	NA	NA	3	remorin C-terminal domain containing protein, putative, expressed
LOC_Os02g58100	NA	NA	NA	NA	-3.76747	7.98591e-28	-5.75703	3.36021e-46	-3.34306	1.80703e-27	3	expressed protein
LOC_Os02g58310	NA	NA	NA	NA	-2.51055	1.23663e-45	-6.25772	1.13888e-178	-4.02063	1.56329e-100	3	expressed protein
LOC_Os03g01020	NA	NA	NA	NA	NA	NA	NA	NA	-4.49179	7.40803e-05	3	pectinesterase inhibitor domain containing protein, putative, expressed
LOC_Os03g01290	NA	NA	NA	NA	NA	NA	NA	NA	2.28601	0.000585973	1	peptide transporter PTR2, putative, expressed
LOC_Os03g01740	3.1982	5.32121e-60	NA	NA	NA	NA	NA	NA	NA	NA	1	expressed protein
LOC_Os03g01930	NA	NA	NA	NA	NA	NA	-3.39146	3.79635e-48	-3.3031	2.77183e-46	3	retrotransposon protein, putative, unclassified, expressed
LOC_Os03g02020	NA	NA	NA	NA	NA	NA	NA	NA	-3.27398	6.37455e-89	1	stress responsive A/B Barrel domain containing protein, expressed
LOC_Os03g02240	NA	NA	NA	NA	NA	NA	NA	NA	2.19571	1.29081e-12	1	AT-GTL1, putative, expressed
LOC_Os03g02750	NA	NA	NA	NA	NA	NA	-2.63308	6.03843e-05	-2.91711	5.07551e-06	3	OsSub25 - Putative Subtilisin homologue, expressed
LOC_Os03g03200	2.33434	1.13293e-15	2.22668	5.2929e-14	NA	NA	NA	NA	NA	NA	1	hydrolase, alpha/beta fold family protein, putative, expressed
LOC_Os03g03320	NA	NA	NA	NA	NA	NA	-2.08212	4.42984e-05	NA	NA	3	expressed protein
LOC_Os03g03450	NA	NA	2.24556	4.12639e-39	NA	NA	NA	NA	NA	NA	1	anthranilate phosphoribosyltransferase, chloroplast precursor, putative, expressed
LOC_Os03g03490	NA	NA	NA	NA	NA	NA	-2.19312	9.59087e-09	NA	NA	3	expressed protein
LOC_Os03g03500	NA	NA	NA	NA	NA	NA	NA	NA	-2.01467	3.33053e-09	3	heavy metal-associated domain containing protein, expressed
LOC_Os03g03550	NA	NA	NA	NA	NA	NA	-2.3296	0.00200713	NA	NA	3	bZIP family transcription factor, putative, expressed
LOC_Os03g03670	NA	NA	NA	NA	-2.61343	4.83124e-27	-3.52617	7.25261e-46	NA	NA	3	expressed protein
LOC_Os03g03790	NA	NA	2.3333	7.10888e-05	NA	NA	NA	NA	NA	NA	1	AMP-binding domain containing protein, expressed
LOC_Os03g04470	NA	NA	NA	NA	NA	NA	-2.26479	5.59281e-18	NA	NA	3	expressed protein
LOC_Os03g04770	NA	NA	NA	NA	-2.01684	2.99116e-16	-3.21471	1.5396e-38	NA	NA	3	beta-amylase, putative, expressed
LOC_Os03g04870	NA	NA	2.5991	0.00129869	NA	NA	NA	NA	NA	NA	1	expressed protein
LOC_Os03g04890	NA	NA	3.64327	3.59194e-20	2.52021	8.39416e-10	2.90442	1.05792e-13	2.09324	4.78071e-07	1	zinc finger family protein, putative, expressed
LOC_Os03g05270	NA	NA	NA	NA	NA	NA	4.45768	1.61175e-26	2.03565	0.000283907	1	RING finger and CHY zinc finger domain-containing protein 1, putative, expressed
LOC_Os03g05290	NA	NA	NA	NA	NA	NA	NA	NA	-2.80955	5.21769e-15	3	aquaporin protein, putative, expressed
LOC_Os03g05750	2.95515	8.79498e-29	NA	NA	NA	NA	NA	NA	NA	NA	1	heavy-metal-associated domain-containing protein, putative, expressed
LOC_Os03g06630	NA	NA	NA	NA	NA	NA	-2.1259	1.29074e-16	NA	NA	3	heat stress transcription factor, putative, expressed
LOC_Os03g06890	NA	NA	2.05556	1.2124e-10	NA	NA	NA	NA	NA	NA	1	DUF593 domain containing protein, expressed
LOC_Os03g07170	NA	NA	NA	NA	NA	NA	2.47157	4.48953e-14	2.24502	2.20522e-11	1	lactose permease-related, putative, expressed
LOC_Os03g07360	NA	NA	NA	NA	NA	NA	NA	NA	-5.07186	4.556e-213	3	expressed protein
LOC_Os03g07440	NA	NA	NA	NA	NA	NA	-2.29453	5.45285e-10	NA	NA	3	putativ eribonuclease P, putative, expressed
LOC_Os03g07960	NA	NA	NA	NA	NA	NA	-3.40333	6.87331e-90	NA	NA	3	expressed protein
LOC_Os03g08310	6.51049	1.11759e-62	4.66247	1.29935e-29	3.91119	2.35282e-20	3.48874	2.30906e-16	NA	NA	1	ZIM domain containing protein, putative, expressed
LOC_Os03g08320	4.15837	1.05242e-27	3.75485	5.09001e-23	2.74827	2.87235e-13	NA	NA	NA	NA	1	ZIM domain containing protein, putative, expressed
LOC_Os03g08330	4.8871	1.02875e-43	2.40319	1.27645e-11	NA	NA	NA	NA	NA	NA	1	ZIM domain containing protein, putative, expressed
LOC_Os03g08460	NA	NA	NA	NA	NA	NA	2.27376	0.00119873	2.54926	0.000241047	1	AP2 domain containing protein, expressed
LOC_Os03g08470	NA	NA	NA	NA	NA	NA	2.78714	2.70773e-11	NA	NA	1	AP2 domain containing protein, expressed
LOC_Os03g08520	5.92936	1.6281e-11	2.43134	0.0264156	NA	NA	NA	NA	NA	NA	1	DUF581 domain containing protein, expressed
LOC_Os03g08540	NA	NA	NA	NA	-2.68284	0.0142403	-3.62277	0.00104069	-3.14337	0.00500826	3	expressed protein
LOC_Os03g08580	NA	NA	NA	NA	NA	NA	7.58629	6.07459e-101	5.0409	1.03048e-49	1	expressed protein
LOC_Os03g08880	3.75049	5.7564e-11	3.80849	2.04543e-11	4.11399	4.31391e-14	4.05203	3.78744e-14	2.30567	0.000763052	1	purine permease, putative, expressed
LOC_Os03g08920	3.81233	0.0161809	NA	NA	NA	NA	NA	NA	NA	NA	1	Zinc finger, C3HC4 type domain containing protein, expressed
LOC_Os03g09170	3.0546	1.30774e-05	NA	NA	NA	NA	NA	NA	NA	NA	1	ethylene-responsive transcription factor, putative, expressed
LOC_Os03g10080	NA	NA	NA	NA	NA	NA	-2.28009	1.83721e-23	NA	NA	3	expressed protein
LOC_Os03g10090	NA	NA	NA	NA	NA	NA	-2.06024	6.74066e-16	-2.07905	5.56151e-16	3	transporter family protein, putative, expressed
LOC_Os03g10300	7.282	3.49084e-33	5.40526	1.2388e-15	4.50813	4.05076e-10	5.3427	2.99291e-16	NA	NA	2	haemolysin-III, putative, expressed
LOC_Os03g10640	2.34321	5.87655e-17	2.15612	1.40833e-13	NA	NA	NA	NA	NA	NA	1	calcium-transporting ATPase, plasma membrane-type, putative, expressed
LOC_Os03g11040	NA	NA	NA	NA	2.43676	0.0243564	2.70705	0.00172302	NA	NA	1	cyclin, putative, expressed
LOC_Os03g12020	NA	NA	NA	NA	NA	NA	-2.12369	7.37531e-23	NA	NA	3	50S ribosomal protein L15, chloroplast precursor, putative, expressed
LOC_Os03g12260	NA	NA	NA	NA	-2.17367	0.00262531	-3.1467	1.97282e-06	NA	NA	3	cytochrome P450 protein, putative, expressed
LOC_Os03g12500	NA	NA	2.00859	0.00065828	3.19444	5.65007e-10	3.63998	4.54255e-13	3.18793	3.3337e-10	1	cytochrome P450, putative, expressed
LOC_Os03g12510	NA	NA	NA	NA	4.29528	0.000719934	4.89213	1.27731e-05	5.38301	2.30374e-07	1	non-symbiotic hemoglobin 2, putative, expressed
LOC_Os03g12520	NA	NA	NA	NA	-2.51961	0.0011567	-2.22075	0.00100279	-3.04306	6.75281e-06	3	STRUBBELIG-RECEPTOR FAMILY 7 precursor, putative, expressed
LOC_Os03g12700	NA	NA	NA	NA	-2.43516	3.42077e-14	-5.58933	1.56935e-54	-8.92295	1.48724e-86	3	expressed protein
LOC_Os03g12840	NA	NA	NA	NA	NA	NA	NA	NA	-2.01492	3.37451e-22	3	Inositol 1, 3, 4-trisphosphate 5/6-kinase, putative, expressed
LOC_Os03g12890	NA	NA	NA	NA	NA	NA	NA	NA	2.09824	1.29466e-13	1	aminotransferase domain containing protein, putative, expressed
LOC_Os03g13030	NA	NA	NA	NA	NA	NA	NA	NA	-2.09355	5.69555e-20	3	lecithin cholesterol acyltransferase, putative, expressed
LOC_Os03g13140	NA	NA	NA	NA	2.47392	0.00693106	3.60673	6.61293e-07	4.77901	4.25107e-12	1	non-symbiotic hemoglobin 2, putative, expressed
LOC_Os03g13180	NA	NA	NA	NA	6.20244	3.13537e-05	7.54742	3.68264e-10	7.10214	8.07364e-08	2	peroxidase precursor, putative, expressed
LOC_Os03g13300	NA	NA	2.86851	9.29734e-31	2.45037	3.93989e-23	NA	NA	NA	NA	1	glutamate decarboxylase, putative, expressed
LOC_Os03g13740	5.51893	5.85644e-19	4.62167	2.48466e-12	3.56751	4.67445e-07	4.31329	2.19328e-11	3.74434	6.07355e-08	2	immediate-early fungal elicitor protein CMPG1, putative, expressed
LOC_Os03g14010	NA	NA	NA	NA	NA	NA	-2.95843	6.9521e-08	NA	NA	3	glycosyl hydrolase family 10 protein, putative, expressed
LOC_Os03g14030	NA	NA	NA	NA	NA	NA	2.25592	0.00233559	2.33507	0.00165834	1	thaumatin, putative, expressed
LOC_Os03g14654	NA	NA	NA	NA	NA	NA	NA	NA	2.37458	0.00117947	1	LTPL108 - Protease inhibitor/seed storage/LTP family protein precursor, expressed
LOC_Os03g14669	NA	NA	NA	NA	NA	NA	NA	NA	-2.23673	4.99764e-16	3	core histone H2A/H2B/H3/H4, putative, expressed
LOC_Os03g15020	NA	NA	NA	NA	NA	NA	-2.59525	1.74262e-19	NA	NA	3	beta-galactosidase precursor, putative, expressed
LOC_Os03g15460	NA	NA	NA	NA	NA	NA	-2.62177	1.80411e-06	-3.33985	8.38746e-09	3	expressed protein
LOC_Os03g15780	NA	NA	2.64329	6.44734e-51	2.1307	4.46795e-34	NA	NA	NA	NA	1	anthranilate synthase component I-1, chloroplast precursor, putative, expressed
LOC_Os03g15920	NA	NA	NA	NA	4.83171	5.90078e-96	7.4375	1.24543e-203	3.59888	5.57335e-56	1	expressed protein
LOC_Os03g16020	NA	NA	NA	NA	NA	NA	NA	NA	-2.47679	1.77358e-11	3	hsp20/alpha crystallin family protein, putative, expressed
LOC_Os03g16030	NA	NA	NA	NA	-2.26243	0.000416729	-2.70201	1.22388e-05	-2.20141	0.000134117	3	hsp20/alpha crystallin family protein, putative, expressed
LOC_Os03g16780	NA	NA	NA	NA	NA	NA	2.35585	2.77221e-24	2.40373	4.09454e-25	1	ankyrin repeat family protein, putative, expressed
LOC_Os03g16900	NA	NA	NA	NA	NA	NA	-3.85162	0.000211424	NA	NA	3	rab GDP dissociation inhibitor alpha, putative, expressed
LOC_Os03g16950	NA	NA	NA	NA	NA	NA	2.42498	4.30658e-05	3.84863	8.31945e-11	1	cysteine-rich repeat secretory protein 55 precursor, putative, expressed
LOC_Os03g16960	NA	NA	NA	NA	NA	NA	NA	NA	2.55418	1.09847e-09	1	cysteine-rich repeat secretory protein 55 precursor, putative, expressed
LOC_Os03g17174	NA	NA	NA	NA	-2.51574	1.15571e-07	NA	NA	NA	NA	3	PsbP, putative, expressed
LOC_Os03g17350	NA	NA	NA	NA	NA	NA	NA	NA	2.22938	0.000345092	1	white-brown complex homolog protein, putative, expressed
LOC_Os03g17480	NA	NA	NA	NA	NA	NA	NA	NA	2.00086	0.002989	1	IN2-1 protein, putative, expressed
LOC_Os03g17520	NA	NA	NA	NA	NA	NA	NA	NA	-2.44961	4.25484e-35	3	CDP-alcohol phosphatidyltransferase, putative, expressed
LOC_Os03g17570	NA	NA	NA	NA	NA	NA	NA	NA	-6.16247	0	3	response regulator receiver domain containing protein, expressed
LOC_Os03g17600	NA	NA	NA	NA	NA	NA	-2.20659	4.28704e-43	NA	NA	3	expressed protein
LOC_Os03g17700	3.91665	5.63271e-71	2.00009	4.94213e-20	NA	NA	2.23653	5.84313e-26	NA	NA	1	CGMC_MAPKCGMC_2_ERK.2 - CGMC includes CDA, MAPK, GSK3, and CLKC kinases, expressed
LOC_Os03g17790	NA	NA	NA	NA	NA	NA	-2.28218	4.15422e-05	NA	NA	3	OsRCI2-5 - Putative low temperature and salt responsive protein, expressed
LOC_Os03g18070	NA	NA	NA	NA	NA	NA	NA	NA	-2.46436	8.94309e-74	3	omega-3 fatty acid desaturase, chloroplast precursor, putative, expressed
LOC_Os03g18170	NA	NA	NA	NA	NA	NA	NA	NA	-2.56071	0.00174039	3	STE_MEKK_ste11_MAP3K.13 - STE kinases include homologs to sterile 7, sterile 11 and sterile 20 from yeast, expressed
LOC_Os03g18250	NA	NA	NA	NA	NA	NA	NA	NA	-3.05729	0.00686329	3	expressed protein
LOC_Os03g18740	3.81008	2.59988e-20	2.82632	7.53884e-11	2.20771	9.73628e-07	2.27002	1.52408e-07	NA	NA	1	oxidoreductase, short chain dehydrogenase/reductase family, putative, expressed
LOC_Os03g18870	NA	NA	NA	NA	NA	NA	2.4273	2.97228e-22	NA	NA	1	heat shock protein DnaJ, putative, expressed
LOC_Os03g18910	3.04405	2.28519e-27	NA	NA	NA	NA	NA	NA	NA	NA	1	COBRA-like protein 7 precursor, putative, expressed
LOC_Os03g19070	2.46462	5.74318e-05	NA	NA	NA	NA	NA	NA	NA	NA	1	long cell-linked locus protein, putative, expressed
LOC_Os03g19290	NA	NA	NA	NA	NA	NA	-2.01177	1.20217e-05	-2.35768	9.99449e-08	3	mitochondrial import inner membrane translocase subunit Tim17, putative, expressed
LOC_Os03g19380	NA	NA	NA	NA	NA	NA	NA	NA	-2.33817	1.30857e-16	3	calvin cycle protein CP12, putative, expressed
LOC_Os03g19560	NA	NA	NA	NA	NA	NA	-2.69092	1.37579e-38	NA	NA	3	tetratricopeptide repeat domain containing protein, expressed
LOC_Os03g19700	NA	NA	NA	NA	NA	NA	2.20155	0.000180074	2.24475	0.000116565	1	plant protein of unknown function domain containing protein, expressed
LOC_Os03g20290	3.54528	3.87121e-05	NA	NA	NA	NA	NA	NA	NA	NA	1	aspartic proteinase nepenthesin-1 precursor, putative, expressed
LOC_Os03g20380	NA	NA	2.22182	2.08517e-11	2.11641	1.38954e-10	NA	NA	NA	NA	1	CAMK_KIN1/SNF1/Nim1_like.2 - CAMK includes calcium/calmodulin depedent protein kinases, expressed
LOC_Os03g20650	NA	NA	NA	NA	NA	NA	NA	NA	-2.51619	0.0144037	3	bZIP transcription factor domain containing protein, expressed
LOC_Os03g20680	NA	NA	NA	NA	NA	NA	NA	NA	-7.30953	7.2339e-07	3	late embryogenesis abundant protein 1, putative, expressed
LOC_Os03g20700	NA	NA	NA	NA	NA	NA	-2.51497	2.68158e-27	-5.73452	2.74269e-104	3	magnesium-chelatase, putative, expressed
LOC_Os03g20970	NA	NA	NA	NA	2.05966	0.000199579	2.4493	1.43163e-06	NA	NA	1	phospholipid-transporting ATPase 1, putative, expressed
LOC_Os03g21419	NA	NA	NA	NA	NA	NA	-4.58656	8.9253e-05	NA	NA	3	retrotransposon protein, putative, Ty1-copia subclass, expressed
LOC_Os03g21890	NA	NA	NA	NA	NA	NA	-2.75002	2.7391e-53	NA	NA	3	potassium transporter, putative, expressed
LOC_Os03g21960	NA	NA	NA	NA	NA	NA	-2.51141	0.000353526	NA	NA	3	aminotransferase, putative, expressed
LOC_Os03g22020	NA	NA	NA	NA	NA	NA	NA	NA	3.43057	1.7905e-05	1	peroxidase precursor, putative, expressed
LOC_Os03g22040	NA	NA	NA	NA	NA	NA	2.3598	0.00397906	NA	NA	1	expressed protein
LOC_Os03g22050	NA	NA	NA	NA	NA	NA	3.13513	3.9653e-65	NA	NA	1	CAMK_KIN1/SNF1/Nim1_like.16 - CAMK includes calcium/calmodulin depedent protein kinases, expressed
LOC_Os03g22170	NA	NA	NA	NA	3.42272	5.74931e-06	3.42384	3.15159e-06	NA	NA	1	AP2 domain containing protein, expressed
LOC_Os03g22370	NA	NA	NA	NA	NA	NA	NA	NA	-3.47353	7.74694e-17	3	ultraviolet-B-repressible protein, putative, expressed
LOC_Os03g22620	3.2057	0.0082996	NA	NA	NA	NA	NA	NA	NA	NA	1	terpene synthase family, metal binding domain containing protein, expressed
LOC_Os03g22634	NA	NA	NA	NA	-3.93195	2.90182e-05	-7.97643	3.54914e-13	-3.57329	9.882e-05	3	terpene synthase, putative, expressed
LOC_Os03g22820	2.53701	0.000826372	2.93069	2.11688e-05	3.24884	8.29203e-08	3.52142	4.43565e-10	NA	NA	1	expressed protein
LOC_Os03g24100	NA	NA	2.70748	0.0423957	NA	NA	NA	NA	NA	NA	1	expressed protein
LOC_Os03g24680	NA	NA	NA	NA	NA	NA	7.26736	0.000841838	NA	NA	1	terpene synthase, putative, expressed
LOC_Os03g24820	NA	NA	NA	NA	NA	NA	3.12051	0.00388892	3.46297	0.00107503	1	expressed protein
LOC_Os03g24870	NA	NA	NA	NA	2.04589	0.000654107	4.51227	7.78201e-25	NA	NA	1	transporter family protein, putative, expressed
LOC_Os03g25040	NA	NA	NA	NA	NA	NA	7.36649	2.27085e-10	8.61355	2.978e-19	1	GDSL-like lipase/acylhydrolase, putative, expressed
LOC_Os03g25080	NA	NA	NA	NA	NA	NA	-2.0354	1.10802e-18	-2.62043	4.41338e-28	3	OsFBX86 - F-box domain containing protein, expressed
LOC_Os03g25330	NA	NA	NA	NA	NA	NA	NA	NA	5.31877	0.000282665	1	peroxidase precursor, putative, expressed
LOC_Os03g25500	NA	NA	NA	NA	NA	NA	NA	NA	-5.81993	1.41968e-24	3	cytochrome P450 72A1, putative, expressed
LOC_Os03g25850	NA	NA	NA	NA	-5.98335	2.95017e-12	-6.39713	1.42647e-13	-4.51531	2.13272e-11	3	expressed protein
LOC_Os03g25869	NA	NA	NA	NA	-3.15058	0.000189685	-4.45895	6.01695e-08	-3.60314	6.41073e-06	3	amino acid permease family protein, putative, expressed
LOC_Os03g26044	NA	NA	NA	NA	NA	NA	NA	NA	-2.08533	1.79002e-16	1	CSLA5 - cellulose synthase-like family A; mannan synthase, expressed
LOC_Os03g26210	NA	NA	NA	NA	NA	NA	NA	NA	-2.20903	1.17672e-14	3	helix-loop-helix DNA-binding domain containing protein, expressed
LOC_Os03g27019	NA	NA	NA	NA	NA	NA	-2.13565	7.91591e-27	-5.77308	4.99645e-142	3	expressed protein
LOC_Os03g27230	NA	NA	2.31137	7.26181e-50	NA	NA	NA	NA	NA	NA	1	phospho-2-dehydro-3-deoxyheptonate aldolase, chloroplast precursor, putative, expressed
LOC_Os03g28160	NA	NA	NA	NA	-3.53785	4.78592e-06	NA	NA	2.02986	0.0032871	3	jacalin-like lectin domain containing protein, expressed
LOC_Os03g28170	NA	NA	NA	NA	-5.07131	1.15333e-06	-2.47813	0.0028784	NA	NA	3	expressed protein
LOC_Os03g28300	NA	NA	NA	NA	NA	NA	-2.37234	3.81514e-33	-2.42135	2.62518e-34	3	protein kinase domain containing protein, expressed
LOC_Os03g28380	NA	NA	NA	NA	NA	NA	NA	NA	-2.80518	1.93302e-06	3	retrotransposon protein, putative, unclassified, expressed
LOC_Os03g29360	NA	NA	NA	NA	4.90236	0.0349792	NA	NA	NA	NA	2	expressed protein
LOC_Os03g29410	3.05176	1.85792e-21	2.0822	6.94332e-10	2.00509	1.59338e-09	2.55829	7.53109e-16	NA	NA	1	tyrosine protein kinase domain containing protein, putative, expressed
LOC_Os03g31690	NA	NA	NA	NA	NA	NA	NA	NA	-2.91521	1.35426e-86	3	GCN5-related N-acetyltransferase, putative, expressed
LOC_Os03g32230	7.60732	1.28587e-68	5.88502	2.61898e-37	5.66911	1.44848e-34	5.97871	1.13809e-40	2.4878	0.000178317	2	ZOS3-12 - C2H2 zinc finger protein, expressed
LOC_Os03g32420	3.65095	2.21116e-12	3.01486	4.03155e-08	NA	NA	NA	NA	NA	NA	1	expressed protein
LOC_Os03g32490	NA	NA	NA	NA	NA	NA	NA	NA	-3.81674	5.67755e-19	3	DUF1230 domain containing protein, expressed
LOC_Os03g33520	NA	NA	6.32117	6.82608e-16	4.29512	0.000151863	4.3454	2.15429e-05	NA	NA	1	exo70 exocyst complex subunit, putative, expressed
LOC_Os03g36650	3.87077	0.0113336	NA	NA	NA	NA	NA	NA	NA	NA	1	cysteine-rich repeat secretory protein 55 precursor, putative, expressed
LOC_Os03g36920	NA	NA	NA	NA	NA	NA	NA	NA	2.85223	0.000523071	1	disease resistance protein, putative, expressed
LOC_Os03g37290	NA	NA	NA	NA	4.98196	5.49585e-08	7.27285	9.1699e-17	8.49746	5.65893e-21	1	cytochrome P450, putative, expressed
LOC_Os03g38540	NA	NA	NA	NA	NA	NA	2.56377	1.10551e-07	NA	NA	1	folic acid binding protein, putative, expressed
LOC_Os03g38640	NA	NA	NA	NA	2.72965	0.0140557	2.96442	0.00151143	NA	NA	1	expressed protein
LOC_Os03g38730	NA	NA	NA	NA	NA	NA	-2.59078	3.34868e-92	NA	NA	3	peroxisomal membrane protein, putative, expressed
LOC_Os03g38940	NA	NA	NA	NA	2.97946	2.04996e-19	4.83875	3.97693e-56	3.31931	1.44648e-25	1	expressed protein
LOC_Os03g38950	NA	NA	NA	NA	2.45286	1.21226e-47	4.54115	3.42818e-140	2.27262	3.61844e-42	1	chloroplast post-illumination chlorophyll fluorescence increase protein, putative, expressed
LOC_Os03g39020	NA	NA	NA	NA	NA	NA	NA	NA	2.0196	0.000310545	1	Kinesin motor domain domain containing protein, expressed
LOC_Os03g39610	NA	NA	NA	NA	NA	NA	NA	NA	-10.1684	1.14382e-209	3	chlorophyll A-B binding protein, putative, expressed
LOC_Os03g39690	NA	NA	NA	NA	NA	NA	NA	NA	2.99354	1.97355e-08	1	cytochrome P450, putative, expressed
LOC_Os03g39760	NA	NA	NA	NA	NA	NA	-3.07876	7.95596e-22	-3.06611	1.99065e-21	3	cytochrome P450, putative, expressed
LOC_Os03g39860	NA	NA	NA	NA	NA	NA	NA	NA	-2.06374	3.19619e-49	3	acyl carrier protein, putative, expressed
LOC_Os03g40100	NA	NA	NA	NA	NA	NA	-2.69312	9.54791e-57	NA	NA	3	ACT domain containing protein, expressed
LOC_Os03g40670	NA	NA	NA	NA	NA	NA	NA	NA	2.02771	3.95414e-10	1	glycerophosphoryl diester phosphodiesterase family protein, putative, expressed
LOC_Os03g41060	NA	NA	NA	NA	NA	NA	NA	NA	-3.34319	0.000719359	3	GASR2 - Gibberellin-regulated GASA/GAST/Snakin family protein precursor, putative, expressed
LOC_Os03g43440	NA	NA	NA	NA	NA	NA	2.34254	2.33107e-09	NA	NA	1	CAMK_KIN1/SNF1/Nim1_like.17 - CAMK includes calcium/calmodulin depedent protein kinases, expressed
LOC_Os03g43720	NA	NA	NA	NA	NA	NA	-2.46129	9.54791e-57	NA	NA	3	transporter family protein, putative, expressed
LOC_Os03g43880	5.30572	0.0154765	NA	NA	NA	NA	NA	NA	NA	NA	1	PLA IIIA/PLP7, putative, expressed
LOC_Os03g43970	NA	NA	2.47545	2.95621e-07	NA	NA	NA	NA	NA	NA	1	amino acid permease family protein, putative, expressed
LOC_Os03g44100	NA	NA	2.14902	0.0162869	2.74257	2.76173e-05	2.44957	0.000186477	NA	NA	1	phosphonate metabolism protein-related, putative, expressed
LOC_Os03g44380	3.79051	2.46801e-05	NA	NA	NA	NA	NA	NA	NA	NA	1	9-cis-epoxycarotenoid dioxygenase 1, chloroplast precursor, putative, expressed
LOC_Os03g44740	NA	NA	NA	NA	NA	NA	NA	NA	-2.98624	0.00130072	3	cytochrome P450, putative, expressed
LOC_Os03g45850	6.14253	0.00289818	NA	NA	5.21017	0.028385	6.09747	0.000746412	NA	NA	2	OsSAUR16 - Auxin-responsive SAUR gene family member, expressed
LOC_Os03g45860	5.32155	1.03886e-07	3.43341	0.0342698	3.68715	0.0109619	5.25797	6.92019e-08	NA	NA	2	OsSAUR17 - Auxin-responsive SAUR gene family member, expressed
LOC_Os03g45960	NA	NA	NA	NA	2.17964	1.09053e-06	3.6452	2.00359e-18	3.84901	4.59676e-20	1	thaumatin, putative, expressed
LOC_Os03g46070	NA	NA	NA	NA	NA	NA	2.94656	2.62559e-06	2.40044	0.0002098	1	thaumatin, putative, expressed
LOC_Os03g46150	NA	NA	NA	NA	NA	NA	NA	NA	5.89508	0.000325787	1	LTPL72 - Protease inhibitor/seed storage/LTP family protein precursor, expressed
LOC_Os03g46200	NA	NA	2.47367	4.96001e-10	2.25587	1.05318e-08	2.61454	5.55984e-12	NA	NA	1	acetyltransferase, GNAT family, putative, expressed
LOC_Os03g46250	NA	NA	NA	NA	NA	NA	NA	NA	2.66791	0.00620949	1	acetyltransferase, GNAT family, putative, expressed
LOC_Os03g46454	NA	NA	NA	NA	NA	NA	NA	NA	-2.21306	0.000468559	3	metal cation transporter, putative, expressed
LOC_Os03g47160	NA	NA	NA	NA	2.45382	0.00323121	NA	NA	NA	NA	1	expressed protein
LOC_Os03g47280	4.45352	1.13293e-15	2.92661	1.54619e-06	3.84584	5.42289e-12	3.05589	6.38552e-08	NA	NA	1	VQ domain containing protein, putative, expressed
LOC_Os03g47530	4.97254	0.0001099	4.01479	0.0388611	3.78189	0.0209413	NA	NA	4.38063	0.00260864	2	glycosyl transferase 8 domain containing protein, putative, expressed
LOC_Os03g47610	NA	NA	NA	NA	3.30626	3.94004e-41	6.25605	3.46879e-116	4.5658	3.97399e-72	1	thiamine biosynthesis protein thiC, putative, expressed
LOC_Os03g47620	NA	NA	NA	NA	NA	NA	5.43612	0.00213101	NA	NA	1	ankyrin, putative, expressed
LOC_Os03g48000	NA	NA	NA	NA	NA	NA	-3.46644	7.2871e-72	-3.14984	4.69742e-61	3	CorA-like magnesium transporter protein, putative, expressed
LOC_Os03g48030	NA	NA	NA	NA	NA	NA	NA	NA	-2.46118	0.0101828	3	integral membrane HPP family protein, putative, expressed
LOC_Os03g48060	NA	NA	NA	NA	NA	NA	-2.20117	9.20276e-17	-4.12098	7.27236e-38	3	class I glutamine amidotransferase, putative, expressed
LOC_Os03g48810	NA	NA	NA	NA	NA	NA	NA	NA	2.15236	1.27828e-07	1	nucleobase-ascorbate transporter, putative, expressed
LOC_Os03g49260	NA	NA	NA	NA	NA	NA	NA	NA	4.5276	0.00323242	1	lipoxygenase, putative, expressed
LOC_Os03g49430	NA	NA	NA	NA	NA	NA	-2.31161	2.3345e-08	NA	NA	3	pre-mRNA-splicing factor, putative, expressed
LOC_Os03g49480	NA	NA	NA	NA	NA	NA	NA	NA	2.43253	6.65139e-08	1	elongation of fatty acids protein 2, putative, expressed
LOC_Os03g49630	NA	NA	NA	NA	-2.564	2.62968e-26	-3.47342	1.87856e-45	NA	NA	3	expressed protein
LOC_Os03g49720	NA	NA	NA	NA	NA	NA	-2.32182	1.1109e-66	NA	NA	3	PAP fibrillin family domain containing protein, expressed
LOC_Os03g50310	NA	NA	NA	NA	NA	NA	-2.45942	5.05438e-23	-7.64893	1.93522e-119	3	CCT/B-box zinc finger protein, putative, expressed
LOC_Os03g50510	NA	NA	NA	NA	NA	NA	2.4981	4.27553e-57	2.12104	9.84548e-42	1	threonine dehydratase biosynthetic, chloroplast precursor, putative, expressed
LOC_Os03g50960	NA	NA	NA	NA	NA	NA	NA	NA	-4.15782	1.02192e-09	1	LTPL118 - Protease inhibitor/seed storage/LTP family protein precursor, expressed
LOC_Os03g51390	2.13868	2.6745e-14	NA	NA	NA	NA	NA	NA	NA	NA	1	expressed protein
LOC_Os03g51530	NA	NA	NA	NA	NA	NA	NA	NA	-3.89597	2.34442e-13	3	expressed protein
LOC_Os03g51920	NA	NA	NA	NA	NA	NA	-3.21856	1.39159e-87	-2.78659	4.07598e-68	3	peptidase, M50 family, putative, expressed
LOC_Os03g51980	NA	NA	NA	NA	NA	NA	-5.57863	0.00412997	NA	NA	3	expressed protein
LOC_Os03g52010	NA	NA	NA	NA	NA	NA	-2.5759	2.12201e-43	NA	NA	3	lecithin cholesterol acyltransferase, putative, expressed
LOC_Os03g52020	3.99821	0.00382862	NA	NA	NA	NA	NA	NA	NA	NA	1	expressed protein
LOC_Os03g52170	NA	NA	NA	NA	NA	NA	NA	NA	-2.01914	7.29166e-44	3	4-hydroxy-3-methylbut-2-enyl diphosphate reductase, putative, expressed
LOC_Os03g52390	NA	NA	NA	NA	NA	NA	NA	NA	2.27842	9.65898e-56	1	PIII1 - Proteinase inhibitor II family protein precursor, expressed
LOC_Os03g52410	6.07902	5.71368e-29	3.90076	3.63705e-08	2.13702	0.0401622	NA	NA	NA	NA	1	expressed protein
LOC_Os03g52420	5.48674	0.00557393	NA	NA	NA	NA	NA	NA	NA	NA	1	expressed protein
LOC_Os03g52680	NA	NA	NA	NA	NA	NA	NA	NA	-2.18691	1.00608e-10	3	expressed protein
LOC_Os03g52720	NA	NA	2.59714	8.9984e-11	2.30802	8.57852e-09	2.56459	1.52848e-11	2.19492	3.54215e-08	1	magnesium-dependent phosphatase 1, putative, expressed
LOC_Os03g52860	NA	NA	NA	NA	5.65498	6.46457e-05	4.36446	0.00147031	NA	NA	1	lipoxygenase, putative, expressed
LOC_Os03g52910	2.05244	8.28835e-16	NA	NA	NA	NA	NA	NA	NA	NA	1	uncharacterized UPF0114 domain containing protein, expressed
LOC_Os03g53020	4.88107	5.54954e-68	2.61465	1.09855e-21	NA	NA	NA	NA	NA	NA	1	helix-loop-helix DNA-binding domain containing protein, expressed
LOC_Os03g53220	NA	NA	2.26107	0.0377768	2.25798	0.0165855	NA	NA	NA	NA	1	U5 small nuclear ribonucleoprotein 200 kDa helicase, putative, expressed
LOC_Os03g53340	NA	NA	NA	NA	NA	NA	NA	NA	2.83738	9.7673e-08	1	HSF-type DNA-binding domain containing protein, expressed
LOC_Os03g53350	6.23607	0.000508982	NA	NA	5.57122	0.00602741	6.4287	0.000307033	NA	NA	2	anthocyanin 3-O-beta-glucosyltransferase, putative, expressed
LOC_Os03g53400	NA	NA	NA	NA	NA	NA	-2.34581	2.64434e-05	NA	NA	3	transmembrane BAX inhibitor motif-containing protein, putative, expressed
LOC_Os03g53710	NA	NA	NA	NA	NA	NA	2.0541	1.13913e-13	NA	NA	1	aldose 1-epimerase, putative, expressed
LOC_Os03g53800	NA	NA	NA	NA	NA	NA	2.73861	2.88702e-14	2.26164	5.01359e-10	1	periplasmic beta-glucosidase precursor, putative, expressed
LOC_Os03g54040	NA	NA	NA	NA	NA	NA	-2.45993	3.93908e-10	NA	NA	3	ribosomal protein L6, putative, expressed
LOC_Os03g54930	NA	NA	NA	NA	NA	NA	NA	NA	-3.09145	0.000951205	3	VIP4, putative, expressed
LOC_Os03g55030	NA	NA	NA	NA	-2.43683	0.0255712	-5.44433	8.05866e-08	-6.26419	3.73441e-08	3	UDP-glucoronosyl and UDP-glucosyl transferase domain containing protein, expressed
LOC_Os03g55034	NA	NA	NA	NA	NA	NA	-6.55365	2.61531e-05	-6.56577	3.37027e-05	3	expressed protein
LOC_Os03g55230	NA	NA	NA	NA	NA	NA	9.48132	1.64721e-26	NA	NA	1	cytochrome P450, putative, expressed
LOC_Os03g55540	2.15318	4.36754e-22	NA	NA	NA	NA	NA	NA	NA	NA	1	ZOS3-18 - C2H2 zinc finger protein, expressed
LOC_Os03g55660	NA	NA	NA	NA	2.59878	9.77216e-05	3.85501	4.67281e-13	NA	NA	1	nucleoporin, putative, expressed
LOC_Os03g55670	NA	NA	NA	NA	2.69872	5.92112e-24	5.33949	1.83637e-85	4.14553	1.91355e-55	1	expressed protein
LOC_Os03g55770	NA	NA	NA	NA	NA	NA	4.61272	1.835e-05	NA	NA	1	expressed protein
LOC_Os03g55776	NA	NA	NA	NA	NA	NA	3.16372	1.37977e-40	NA	NA	1	expressed protein
LOC_Os03g55800	3.55661	6.82841e-31	2.97389	1.49621e-21	2.25502	1.06067e-12	2.44668	1.60437e-15	NA	NA	1	cytochrome P450, putative, expressed
LOC_Os03g55840	NA	NA	NA	NA	NA	NA	2.1299	1.74064e-11	NA	NA	1	pentatricopeptide, putative, expressed
LOC_Os03g56670	NA	NA	NA	NA	NA	NA	NA	NA	-2.48389	7.00405e-30	3	photosystem I reaction center subunit III, chloroplast precursor, putative, expressed
LOC_Os03g56950	NA	NA	NA	NA	NA	NA	-2.53101	1.203e-41	-3.99834	2.08081e-87	3	phytochrome-interacting factor 4, putative, expressed
LOC_Os03g57149	NA	NA	NA	NA	NA	NA	NA	NA	-4.17629	3.77995e-35	3	mTERF domain containing protein, expressed
LOC_Os03g57240	NA	NA	NA	NA	NA	NA	NA	NA	-2.22693	2.15689e-18	3	ZOS3-19 - C2H2 zinc finger protein, expressed
LOC_Os03g57520	2.41981	0.00388306	NA	NA	NA	NA	NA	NA	NA	NA	1	VQ domain containing protein, putative, expressed
LOC_Os03g57640	3.30463	2.14371e-09	5.33356	1.22742e-25	3.10264	2.45145e-08	2.4726	1.59817e-05	NA	NA	1	gibberellin receptor GID1L2, putative, expressed
LOC_Os03g57880	2.5968	1.01575e-09	NA	NA	NA	NA	NA	NA	NA	NA	1	glucan endo-1,3-beta-glucosidase precursor, putative, expressed
LOC_Os03g57970	NA	NA	NA	NA	NA	NA	NA	NA	2.31125	0.000142128	1	LTPL73 - Protease inhibitor/seed storage/LTP family protein precursor, expressed
LOC_Os03g57980	NA	NA	NA	NA	NA	NA	NA	NA	2.39566	0.000118006	1	LTPL99 - Protease inhibitor/seed storage/LTP family protein precursor, expressed
LOC_Os03g57990	NA	NA	NA	NA	NA	NA	NA	NA	2.74018	0.00772894	1	LTPL74 - Protease inhibitor/seed storage/LTP family protein precursor, expressed
LOC_Os03g58290	3.9608	0.0307145	NA	NA	NA	NA	NA	NA	NA	NA	1	indole-3-glycerol phosphate lyase, chloroplast precursor, putative, expressed
LOC_Os03g58320	NA	NA	3.70542	0.0290166	6.04619	4.11985e-05	NA	NA	NA	NA	1	indole-3-glycerol phosphate lyase, chloroplast precursor, putative, expressed
LOC_Os03g58420	NA	NA	NA	NA	NA	NA	-2.32028	0.00058695	NA	NA	3	WRKY6, expressed
LOC_Os03g58900	3.49266	1.05201e-27	NA	NA	NA	NA	NA	NA	NA	NA	1	galactosyltransferase family protein, putative, expressed
LOC_Os03g59225	NA	NA	NA	NA	NA	NA	3.02594	1.94255e-26	NA	NA	1	expressed protein
LOC_Os03g59320	NA	NA	NA	NA	NA	NA	-2.20614	1.45868e-54	NA	NA	3	expressed protein
LOC_Os03g59570	NA	NA	NA	NA	NA	NA	-5.29851	1.16536e-05	-5.3825	1.71605e-06	3	IPP transferase, putative, expressed
LOC_Os03g59774	NA	NA	NA	NA	NA	NA	NA	NA	-2.04536	2.34568e-31	1	expressed protein
LOC_Os03g60080	2.23727	2.95018e-24	2.0039	1.63002e-19	NA	NA	NA	NA	NA	NA	1	NAC domain-containing protein 67, putative, expressed
LOC_Os03g60210	5.47956	0.00928977	NA	NA	NA	NA	NA	NA	NA	NA	1	DUF567 domain containing protein, putative, expressed
LOC_Os03g60570	5.76599	2.09469e-12	NA	NA	NA	NA	NA	NA	NA	NA	1	ZOS3-22 - C2H2 zinc finger protein, expressed
LOC_Os03g60580	NA	NA	NA	NA	-2.16828	0.00265253	-3.42752	6.74224e-07	-2.93465	7.18559e-06	3	actin-depolymerizing factor, putative, expressed
LOC_Os03g60880	3.28823	2.84667e-10	NA	NA	NA	NA	NA	NA	NA	NA	1	nucleobase-ascorbate transporter, putative, expressed
LOC_Os03g61040	NA	NA	NA	NA	NA	NA	-2.02533	1.27668e-07	NA	NA	3	GIL1, putative, expressed
LOC_Os03g61150	NA	NA	NA	NA	NA	NA	4.21215	8.46733e-48	2.3792	4.94902e-14	1	expressed protein
LOC_Os03g61270	NA	NA	NA	NA	3.29776	0.0373938	5.26426	3.06911e-10	3.45277	0.00635333	1	OsMan04 - Endo-Beta-Mannanase, expressed
LOC_Os03g61360	NA	NA	2.49186	2.16599e-14	NA	NA	NA	NA	NA	NA	1	hydrolase, alpha/beta fold family domain containing protein, expressed
LOC_Os03g61490	2.75966	2.21055e-09	2.75665	3.05369e-09	2.36159	7.32532e-07	2.69142	1.40933e-09	NA	NA	1	expressed protein
LOC_Os03g61500	5.41003	3.86124e-08	8.08595	6.02033e-25	8.63039	9.65056e-29	9.17621	1.70721e-34	5.25829	9.02136e-08	2	uncharacterized Cys-rich domain containing protein, putative, expressed
LOC_Os03g61510	NA	NA	5.06995	0.0399601	6.02958	4.02487e-05	6.32456	2.58253e-05	NA	NA	2	pectinesterase inhibitor domain containing protein, expressed
LOC_Os03g61720	NA	NA	NA	NA	NA	NA	-2.44039	0.00321334	-2.78452	0.00130512	3	glycerol-3-phosphate acyltransferase, putative, expressed
LOC_Os03g61740	NA	NA	NA	NA	NA	NA	NA	NA	4.25027	0.000105749	1	sex determination protein tasselseed-2, putative, expressed
LOC_Os03g61890	NA	NA	NA	NA	NA	NA	-2.02533	2.10226e-49	NA	NA	3	chloroplast protein import component Toc159, putative, expressed
LOC_Os03g62170	NA	NA	NA	NA	NA	NA	NA	NA	-2.67833	1.29913e-18	3	cyclase/dehydrase family protein, expressed
LOC_Os03g62230	NA	NA	NA	NA	NA	NA	5.46625	0.00322385	NA	NA	2	ZOS3-24 - C2H2 zinc finger protein, expressed
LOC_Os03g62480	NA	NA	2.78743	5.20906e-05	3.33357	5.07159e-09	3.62408	1.91474e-11	2.84491	2.30957e-06	1	anthocyanidin 5,3-O-glucosyltransferase, putative, expressed
LOC_Os03g62670	NA	NA	NA	NA	NA	NA	-2.18726	1.53341e-06	NA	NA	3	expressed protein
LOC_Os03g63330	NA	NA	NA	NA	NA	NA	NA	NA	-2.37731	1.14125e-56	3	aspartokinase, chloroplast precursor, putative, expressed
LOC_Os03g63370	NA	NA	NA	NA	NA	NA	NA	NA	-2.0681	3.10698e-14	3	CRAL/TRIO domain containing protein, expressed
LOC_Os03g63910	NA	NA	NA	NA	NA	NA	2.5672	1.79901e-62	NA	NA	1	PPR repeat domain containing protein, putative, expressed
LOC_Os03g64020	NA	NA	NA	NA	NA	NA	NA	NA	-3.35643	2.29709e-57	3	expressed protein
LOC_Os03g64260	3.76218	1.48707e-18	4.18717	5.61737e-23	3.09224	1.04402e-11	2.72934	2.46494e-09	NA	NA	1	AP2 domain containing protein, expressed
LOC_Os04g01470	NA	NA	NA	NA	NA	NA	3.39236	0.000539469	3.45224	0.000703399	1	O-methyltransferase, putative, expressed
LOC_Os04g01710	NA	NA	NA	NA	NA	NA	-3.16783	5.22726e-06	NA	NA	3	cysteine proteinase At4g11310 precursor, putative, expressed
LOC_Os04g01740	NA	NA	NA	NA	NA	NA	-3.80427	0.00248316	-2.79705	0.00856859	3	heat shock protein, putative, expressed
LOC_Os04g01810	NA	NA	NA	NA	NA	NA	NA	NA	4.3978	0.00144921	1	terpene synthase, putative, expressed
LOC_Os04g01950	NA	NA	3.14295	0.0126467	2.80047	0.0103945	3.22734	0.000686821	NA	NA	1	legume lectins beta domain containing protein, putative, expressed
LOC_Os04g02880	NA	NA	NA	NA	NA	NA	4.17449	3.71632e-16	6.59063	3.03611e-40	1	expressed protein
LOC_Os04g03100	NA	NA	NA	NA	2.41893	0.0026904	4.89676	1.04286e-11	6.86155	1.51566e-19	1	OsSub35 - Putative Subtilisin homologue, expressed
LOC_Os04g03164	NA	NA	2.28513	2.28706e-09	3.25794	1.60508e-18	3.38579	1.81495e-20	2.74542	6.61773e-14	1	expressed protein
LOC_Os04g03210	NA	NA	NA	NA	NA	NA	4.10122	2.25875e-09	5.30121	2.17424e-15	1	receptor kinase, putative, expressed
LOC_Os04g03796	NA	NA	NA	NA	NA	NA	NA	NA	2.44562	5.98663e-13	1	OsSub37 - Putative Subtilisin homologue, expressed
LOC_Os04g06590	NA	NA	NA	NA	2.198	3.31768e-05	NA	NA	NA	NA	1	expressed protein
LOC_Os04g06910	NA	NA	NA	NA	2.36441	0.00704889	2.63147	0.000647145	NA	NA	1	expressed protein
LOC_Os04g07110	NA	NA	NA	NA	2.47141	0.0193902	NA	NA	NA	NA	1	expressed protein
LOC_Os04g07260	NA	NA	NA	NA	2.2925	0.0109395	2.8254	0.000367252	NA	NA	1	expressed protein
LOC_Os04g08828	NA	NA	NA	NA	NA	NA	-3.44408	4.33098e-11	-2.62267	5.91873e-07	3	cytochrome P450, putative, expressed
LOC_Os04g09900	NA	NA	NA	NA	3.28703	3.29354e-06	4.85513	5.0151e-12	4.62585	5.11541e-11	1	ent-kaurene synthase, chloroplast precursor, putative, expressed
LOC_Os04g09920	NA	NA	NA	NA	NA	NA	2.81346	9.24041e-12	4.30255	2.37887e-24	1	cytochrome P450, putative, expressed
LOC_Os04g10000	NA	NA	NA	NA	4.59242	1.00927e-27	5.44304	1.15882e-38	4.23009	1.60683e-24	1	sex determination protein tasselseed-2, putative, expressed
LOC_Os04g10010	NA	NA	NA	NA	5.09261	4.40889e-35	5.87455	2.8748e-46	4.61472	2.76364e-30	1	sex determination protein tasselseed-2, putative, expressed
LOC_Os04g10060	NA	NA	2.64643	6.27628e-08	5.68224	3.17689e-32	6.49194	9.61265e-41	4.4373	7.64326e-22	1	ent-kaurene synthase, chloroplast precursor, putative, expressed
LOC_Os04g10160	NA	NA	NA	NA	3.75788	7.89783e-16	4.78599	2.57061e-24	3.84359	8.13729e-17	1	cytochrome P450, putative, expressed
LOC_Os04g10350	NA	NA	2.72849	7.9217e-15	NA	NA	NA	NA	NA	NA	1	1-aminocyclopropane-1-carboxylate oxidase homolog 2, putative, expressed
LOC_Os04g12060	NA	NA	NA	NA	NA	NA	-3.59668	7.44801e-05	NA	NA	3	retrotransposon protein, putative, unclassified, expressed
LOC_Os04g12499	NA	NA	NA	NA	NA	NA	-3.80489	2.12141e-08	-3.52415	2.3088e-07	3	amino acid transporter protein, putative, expressed
LOC_Os04g12530	NA	NA	NA	NA	-2.02764	0.0165341	-3.99374	5.79351e-07	-4.42891	6.63581e-07	3	amino acid transporter family protein, putative, expressed
LOC_Os04g12560	2.25024	0.0318318	NA	NA	NA	NA	NA	NA	NA	NA	1	receptor-like protein kinase, putative, expressed
LOC_Os04g12720	NA	NA	NA	NA	NA	NA	NA	NA	2.61398	0.00972012	1	indole-3-acetate beta-glucosyltransferase, putative, expressed
LOC_Os04g12950	NA	NA	2.58607	0.000374133	NA	NA	NA	NA	NA	NA	1	indole-3-acetate beta-glucosyltransferase, putative, expressed
LOC_Os04g12960	2.02388	9.66773e-06	2.38453	2.90948e-08	NA	NA	NA	NA	NA	NA	1	UDP-glucoronosyl/UDP-glucosyl transferase, putative, expressed
LOC_Os04g12970	NA	NA	2.4151	0.00746159	NA	NA	2.29498	0.00238361	NA	NA	1	UDP-glucoronosyl/UDP-glucosyl transferase, putative, expressed
LOC_Os04g13140	NA	NA	NA	NA	NA	NA	NA	NA	-2.62186	0.0030107	3	vignain precursor, putative, expressed
LOC_Os04g13210	NA	NA	NA	NA	2.61396	1.20981e-23	2.33798	9.96902e-20	NA	NA	1	multidrug resistance-associated protein, putative, expressed
LOC_Os04g14690	NA	NA	NA	NA	NA	NA	2.54793	1.22175e-21	NA	NA	1	flavin-containing monooxygenase family protein, putative, expressed
LOC_Os04g14810	NA	NA	NA	NA	NA	NA	3.26808	3.57833e-08	NA	NA	1	3-5 exonuclease domain-containing protein, putative, expressed
LOC_Os04g15660	NA	NA	NA	NA	NA	NA	NA	NA	2.36379	0.00110992	1	receptor kinase, putative, expressed
LOC_Os04g15920	2.14158	3.35885e-16	NA	NA	NA	NA	NA	NA	NA	NA	1	dehydrogenase, putative, expressed
LOC_Os04g16140	NA	NA	NA	NA	NA	NA	NA	NA	-5.72343	0.00184282	3	expressed protein
LOC_Os04g16680	NA	NA	NA	NA	NA	NA	-2.25345	1.23745e-19	NA	NA	3	fructose-1,6-bisphosphatase, putative, expressed
LOC_Os04g17100	NA	NA	NA	NA	NA	NA	-2.98599	2.3062e-14	-2.78578	1.29081e-12	3	heavy metal-associated domain containing protein, expressed
LOC_Os04g19114	NA	NA	NA	NA	5.34354	0.0228968	NA	NA	NA	NA	1	retrotransposon protein, putative, Ty3-gypsy subclass, expressed
LOC_Os04g21350	NA	NA	NA	NA	NA	NA	NA	NA	-2.61759	8.32676e-06	3	flowering promoting factor-like 1, putative, expressed
LOC_Os04g22080	NA	NA	NA	NA	4.90359	1.40729e-07	6.6427	1.96276e-14	6.08675	3.64664e-12	1	retrotransposon protein, putative, unclassified, expressed
LOC_Os04g23550	6.79809	3.7972e-09	NA	NA	2.79172	0.0245045	NA	NA	NA	NA	1	basic helix-loop-helix family protein, putative, expressed
LOC_Os04g24110	NA	NA	NA	NA	-2.12989	0.000113643	-2.74389	1.51603e-07	NA	NA	3	anthocyanin 3-O-beta-glucosyltransferase, putative, expressed
LOC_Os04g24804	NA	NA	NA	NA	NA	NA	-5.18345	8.50782e-14	-4.68655	1.83917e-11	3	expressed protein
LOC_Os04g25060	NA	NA	NA	NA	NA	NA	2.39729	1.53671e-07	3.08301	1.94427e-11	1	cysteine-rich receptor-like protein kinase, putative, expressed
LOC_Os04g25490	NA	NA	NA	NA	-3.08937	0.0290243	-4.17427	0.000849457	NA	NA	3	cytokinin-O-glucosyltransferase 2, putative, expressed
LOC_Os04g25650	NA	NA	NA	NA	2.04481	2.14773e-05	3.00084	4.4907e-11	3.46676	6.13712e-14	1	cysteine-rich receptor-like protein kinase, putative, expressed
LOC_Os04g25900	NA	NA	NA	NA	NA	NA	NA	NA	3.33502	6.66285e-05	1	go35 NBS-LRR, putative, expressed
LOC_Os04g26870	NA	NA	NA	NA	NA	NA	NA	NA	2.07365	5.34205e-14	1	oxidoreductase, aldo/keto reductase family protein, putative, expressed
LOC_Os04g27060	NA	NA	3.04666	0.00171464	NA	NA	3.51948	2.26921e-05	3.26738	0.000133493	1	oxidoreductase, aldo/keto reductase family protein, putative, expressed
LOC_Os04g27190	NA	NA	NA	NA	NA	NA	NA	NA	2.56792	0.00016117	1	terpene synthase, putative, expressed
LOC_Os04g27340	4.86497	0.00668752	6.08193	7.57477e-05	3.99457	0.0365515	NA	NA	NA	NA	2	terpene synthase, putative, expressed
LOC_Os04g27790	NA	NA	NA	NA	NA	NA	3.2935	2.45897e-21	NA	NA	1	terpene synthase, putative, expressed
LOC_Os04g27800	NA	NA	NA	NA	2.28594	0.0336081	NA	NA	NA	NA	1	expressed protein
LOC_Os04g28360	5.67772	0.0132867	5.34316	0.0321175	NA	NA	5.80604	0.00184448	NA	NA	2	expressed protein
LOC_Os04g28420	NA	NA	NA	NA	NA	NA	-3.20982	4.15901e-11	-2.2302	1.89612e-06	3	peptidyl-prolyl isomerase, putative, expressed
LOC_Os04g28780	NA	NA	NA	NA	3.20999	1.49121e-11	4.10342	1.25517e-18	2.52435	1.01988e-07	1	serine/threonine-protein kinase receptor precursor, putative, expressed
LOC_Os04g29424	NA	NA	NA	NA	NA	NA	2.57733	5.11715e-12	NA	NA	1	retrotransposon protein, putative, LINE subclass, expressed
LOC_Os04g29680	NA	NA	NA	NA	NA	NA	2.91946	0.00448201	3.57807	0.000475302	1	OsWAK38 - OsWAK receptor-like protein kinase, expressed
LOC_Os04g29960	NA	NA	2.099	0.0015446	NA	NA	NA	NA	2.32753	2.49934e-05	1	OsWAK43 - OsWAK receptor-like protein kinase, expressed
LOC_Os04g30260	NA	NA	NA	NA	3.29248	0.00193377	4.92384	2.58977e-08	4.63499	2.77396e-07	1	OsWAK47 - OsWAK receptor-like protein kinase, expressed
LOC_Os04g30330	NA	NA	NA	NA	NA	NA	2.85759	0.00316059	5.02598	5.32979e-09	1	OsWAK59 - OsWAK receptor-like cytoplasmic kinase OsWAK-RLCK, expressed
LOC_Os04g30340	NA	NA	NA	NA	NA	NA	2.58394	0.00119873	3.7673	1.666e-07	1	wall-associated receptor kinase, putative, expressed
LOC_Os04g31610	3.19522	4.84869e-09	NA	NA	NA	NA	NA	NA	NA	NA	1	OsFBO3 - F-box and other domain containing protein, expressed
LOC_Os04g31760	NA	NA	NA	NA	NA	NA	5.9795	0.000193174	5.70617	0.0013523	1	expressed protein
LOC_Os04g32480	4.17589	1.65934e-24	3.38958	1.58716e-15	2.22685	1.54228e-06	NA	NA	NA	NA	1	zinc-finger protein, putative, expressed
LOC_Os04g33060	NA	NA	NA	NA	NA	NA	-3.34231	3.30826e-109	-3.22503	1.3448e-103	3	NAD dependent epimerase/dehydratase family protein, putative, expressed
LOC_Os04g33070	NA	NA	NA	NA	NA	NA	NA	NA	-3.37105	0.0034653	3	expressed protein
LOC_Os04g33260	NA	NA	NA	NA	NA	NA	NA	NA	-2.75337	1.28493e-05	3	expressed protein
LOC_Os04g33390	2.36856	6.83544e-27	2.18378	1.71299e-22	NA	NA	NA	NA	NA	NA	1	prephenate dehydratase domain containing protein, expressed
LOC_Os04g33640	2.66912	1.08697e-08	NA	NA	NA	NA	NA	NA	NA	NA	1	glycosyl hydrolases family 17, putative, expressed
LOC_Os04g33830	NA	NA	NA	NA	NA	NA	-2.90673	8.71931e-15	-10.4599	2.78039e-91	3	membrane protein, putative, expressed
LOC_Os04g34030	NA	NA	6.04361	0.00022212	5.57609	0.00125336	6.35254	5.28051e-05	5.54255	0.00140107	2	U-box domain-containing protein, putative, expressed
LOC_Os04g34320	NA	NA	NA	NA	NA	NA	4.27033	3.18765e-07	NA	NA	1	S-domain receptor-like protein kinase, putative, expressed
LOC_Os04g34390	NA	NA	NA	NA	2.06589	0.0303316	2.68686	0.000226462	3.37981	1.18458e-07	1	serine/threonine-protein kinase receptor precursor, putative, expressed
LOC_Os04g34600	NA	NA	NA	NA	NA	NA	NA	NA	-2.67078	2.20891e-13	3	abscisic stress-ripening, putative, expressed
LOC_Os04g34610	NA	NA	NA	NA	NA	NA	-2.20834	8.56538e-18	-4.00355	6.97199e-50	3	expressed protein
LOC_Os04g35030	NA	NA	NA	NA	NA	NA	NA	NA	-5.67485	3.99238e-05	3	CSLH3 - cellulose synthase-like family H, expressed
LOC_Os04g35100	NA	NA	NA	NA	NA	NA	-2.67732	2.04994e-19	NA	NA	3	phospholipase C, putative, expressed
LOC_Os04g35680	NA	NA	3.47272	3.16089e-16	2.62547	2.20459e-08	2.76758	3.13953e-10	NA	NA	1	U-box domain containing protein, expressed
LOC_Os04g35790	NA	NA	NA	NA	NA	NA	3.41319	3.45296e-07	3.48498	2.79194e-07	1	GLTP domain containing protein, putative, expressed
LOC_Os04g36062	NA	NA	NA	NA	NA	NA	-2.35912	9.95127e-47	NA	NA	3	expressed protein
LOC_Os04g36720	NA	NA	NA	NA	-2.33039	5.86281e-12	-5.25549	6.17516e-47	-4.23266	1.19539e-33	3	ferric-chelate reductase, putative, expressed
LOC_Os04g36830	NA	NA	NA	NA	5.55644	0.00254394	NA	NA	5.13279	0.0119607	1	DUF567 domain containing protein, putative, expressed
LOC_Os04g37430	3.68496	9.89493e-46	NA	NA	NA	NA	NA	NA	NA	NA	1	lipoxygenase protein, putative, expressed
LOC_Os04g37480	NA	NA	NA	NA	NA	NA	NA	NA	-2.1899	1.52905e-06	3	oxidoreductase, aldo/keto reductase family protein, putative, expressed
LOC_Os04g37500	NA	NA	NA	NA	NA	NA	-2.39877	4.65306e-07	NA	NA	3	glutamate decarboxylase, putative, expressed
LOC_Os04g37520	NA	NA	NA	NA	-3.08134	0.00381182	-3.02877	0.000920887	NA	NA	3	extracellular ligand-gated ion channel, putative, expressed
LOC_Os04g37580	NA	NA	NA	NA	NA	NA	-2.18072	1.60172e-43	-2.08692	3.0624e-40	3	cation transport regulator-like protein 1, putative, expressed
LOC_Os04g37619	NA	NA	NA	NA	NA	NA	NA	NA	-2.85162	2.01824e-115	1	zeaxanthin epoxidase, chloroplast precursor, putative, expressed
LOC_Os04g37710	NA	NA	NA	NA	NA	NA	-2.14286	1.53622e-23	NA	NA	3	serine hydrolase domain containing protein, expressed
LOC_Os04g37790	2.50545	3.49774e-21	NA	NA	NA	NA	NA	NA	NA	NA	1	expressed protein
LOC_Os04g37880	2.71719	0.00280521	NA	NA	NA	NA	NA	NA	NA	NA	1	expressed protein
LOC_Os04g37960	NA	NA	NA	NA	2.02942	0.0297272	NA	NA	NA	NA	1	synaptonemal complex protein 2, putative, expressed
LOC_Os04g37990	NA	NA	NA	NA	-3.48733	0.0249976	NA	NA	NA	NA	3	transporter family protein, putative, expressed
LOC_Os04g38410	NA	NA	NA	NA	NA	NA	-2.22956	0.000224098	-8.22045	5.93257e-31	3	chlorophyll A-B binding protein, putative, expressed
LOC_Os04g38540	NA	NA	NA	NA	2.87429	0.00294257	4.47817	7.12616e-09	6.62052	4.76692e-20	1	aldose 1-epimerase, putative, expressed
LOC_Os04g38600	NA	NA	NA	NA	-2.31876	9.80177e-08	-3.31483	6.41651e-15	-3.17242	1.09084e-13	3	glyceraldehyde-3-phosphate dehydrogenase, putative, expressed
LOC_Os04g39010	NA	NA	NA	NA	NA	NA	2.34072	0.00341983	NA	NA	1	heavy metal associated domain containing protein, expressed
LOC_Os04g39290	NA	NA	NA	NA	NA	NA	-2.39633	1.30281e-11	NA	NA	3	heavy metal transport/detoxification protein, putative, expressed
LOC_Os04g40630	NA	NA	NA	NA	NA	NA	NA	NA	-2.6546	3.36e-22	1	BTBZ4 - Bric-a-Brac, Tramtrack, Broad Complex BTB domain with TAZ zinc finger and Calmodulin-binding domains, expressed
LOC_Os04g40670	NA	NA	NA	NA	NA	NA	NA	NA	-2.58303	1.12829e-47	1	expressed protein
LOC_Os04g40970	NA	NA	NA	NA	NA	NA	2.1341	1.26346e-07	NA	NA	1	DEAD-box ATP-dependent RNA helicase, putative, expressed
LOC_Os04g40990	NA	NA	NA	NA	2.65074	0.000754802	2.39959	0.00164532	2.25431	0.00413383	1	malate synthase, glyoxysomal, putative, expressed
LOC_Os04g41340	NA	NA	NA	NA	-2.28067	2.12279e-25	-3.03282	2.54026e-43	NA	NA	3	4-nitrophenylphosphatase, putative, expressed
LOC_Os04g41370	NA	NA	NA	NA	NA	NA	2.66277	0.000852547	NA	NA	1	Leucine Rich Repeat family protein, expressed
LOC_Os04g41380	NA	NA	NA	NA	NA	NA	2.44855	4.25431e-06	2.22836	5.79689e-05	1	Leucine Rich Repeat family protein, expressed
LOC_Os04g41560	NA	NA	NA	NA	NA	NA	NA	NA	-4.89883	3.75793e-112	3	B-box zinc finger family protein, putative, expressed
LOC_Os04g41640	NA	NA	NA	NA	NA	NA	NA	NA	3.59115	3.91118e-05	1	HEV2 - Hevein family protein precursor, expressed
LOC_Os04g41960	2.39768	4.96005e-25	NA	NA	NA	NA	NA	NA	NA	NA	1	NADP-dependent oxidoreductase, putative, expressed
LOC_Os04g42260	NA	NA	NA	NA	NA	NA	NA	NA	-5.36077	0.00532148	3	protein phosphatase 2C, putative, expressed
LOC_Os04g42800	NA	NA	NA	NA	NA	NA	-2.34832	3.81102e-17	NA	NA	3	photosystem-II repair protein, putative, expressed
LOC_Os04g42830	NA	NA	NA	NA	5.24802	0.0383947	6.47335	0.000312177	6.44883	0.00260939	1	transferase family protein, putative, expressed
LOC_Os04g43230	NA	NA	NA	NA	NA	NA	NA	NA	2.21347	0.00288823	1	expressed protein
LOC_Os04g43380	NA	NA	NA	NA	NA	NA	-2.82787	9.48678e-10	-2.96867	5.70162e-10	3	Os4bglu15 - GH1 gene fragment, expressed
LOC_Os04g43400	NA	NA	NA	NA	NA	NA	-2.82574	8.8287e-10	-3.46433	5.0188e-12	3	Os4bglu17 - GH1 gene fragment, expressed
LOC_Os04g43420	NA	NA	NA	NA	NA	NA	2.38715	7.73952e-40	NA	NA	1	PTAC5, putative, expressed
LOC_Os04g43440	3.6	2.39017e-35	2.16891	1.62909e-12	2.16802	6.77086e-13	2.63491	9.10218e-20	NA	NA	1	NB-ARC/LRR disease resistance protein, putative, expressed
LOC_Os04g43650	NA	NA	2.26664	5.65718e-24	NA	NA	NA	NA	NA	NA	1	L-allo-threonine aldolase, putative, expressed
LOC_Os04g43680	4.08535	7.12366e-68	3.11922	4.66209e-41	2.88209	1.16602e-35	3.06162	4.42123e-41	NA	NA	1	MYB family transcription factor, putative, expressed
LOC_Os04g43710	NA	NA	NA	NA	NA	NA	NA	NA	2.79174	3.4476e-29	1	CAMK_CAMK_like.3 - CAMK includes calcium/calmodulin depedent protein kinases, expressed
LOC_Os04g43800	4.46589	2.31067e-24	2.07428	3.06379e-05	2.84518	2.17503e-10	3.39084	3.65327e-15	3.72588	5.18798e-18	1	phenylalanine ammonia-lyase, putative, expressed
LOC_Os04g44060	NA	NA	NA	NA	NA	NA	-6.13575	0.00220469	NA	NA	3	aquaporin protein, putative, expressed
LOC_Os04g44150	NA	NA	-3.79841	0.0169374	NA	NA	-3.30996	0.000952054	-3.00612	0.00447631	3	gibberellin 2-beta-dioxygenase 7, putative, expressed
LOC_Os04g44250	NA	NA	NA	NA	3.77337	0.0218292	NA	NA	3.87043	0.0101264	1	cytokinin-O-glucosyltransferase 3, putative, expressed
LOC_Os04g44980	NA	NA	NA	NA	NA	NA	-2.73368	1.21748e-18	NA	NA	3	short-chain dehydrogenase/reductase, putative, expressed
LOC_Os04g45000	NA	NA	NA	NA	NA	NA	-3.88858	2.42099e-57	-5.27649	4.59017e-88	3	short-chain dehydrogenase/reductase, putative, expressed
LOC_Os04g45130	NA	NA	2.08999	2.71996e-24	NA	NA	NA	NA	NA	NA	1	heavy-metal-associated domain-containing protein, putative, expressed
LOC_Os04g45810	NA	NA	NA	NA	NA	NA	-3.27275	1.6175e-30	NA	NA	3	homeobox associated leucine zipper, putative, expressed
LOC_Os04g45920	4.4436	8.24917e-10	2.92527	0.0213142	NA	NA	3.10273	0.000432696	2.6663	0.0152929	1	protein kinase domain containing protein, expressed
LOC_Os04g46280	NA	NA	NA	NA	NA	NA	NA	NA	-4.80386	1.62872e-51	3	hydrolase, NUDIX family, domain containing protein, expressed
LOC_Os04g46970	2.15821	1.11644e-06	3.23193	1.06666e-14	3.61227	2.93092e-18	3.31703	3.39246e-16	NA	NA	1	glucosyltransferase, putative, expressed
LOC_Os04g46980	NA	NA	NA	NA	2.14321	1.78747e-08	2.29696	4.63592e-10	NA	NA	1	cis-zeatin O-glucosyltransferase, putative, expressed
LOC_Os04g47220	NA	NA	NA	NA	NA	NA	-2.05707	3.03074e-41	NA	NA	3	aquaporin protein, putative, expressed
LOC_Os04g47580	NA	NA	NA	NA	NA	NA	NA	NA	2.21796	0.0097433	1	cyclin, putative, expressed
LOC_Os04g47620	5.54355	0.00769073	5.19143	0.0321469	NA	NA	NA	NA	NA	NA	1	protein kinase APK1B, chloroplast precursor, putative, expressed
LOC_Os04g47720	NA	NA	2.31704	7.20536e-07	NA	NA	NA	NA	NA	NA	1	cis-zeatin O-glucosyltransferase, putative, expressed
LOC_Os04g48290	4.86769	1.47308e-36	3.91942	1.84203e-19	2.05797	0.000326694	3.26009	2.30625e-13	2.5226	6.08942e-07	1	MATE efflux family protein, putative, expressed
LOC_Os04g48850	4.60452	4.43719e-42	4.42741	1.98577e-38	3.70006	7.13054e-28	3.97676	6.60289e-33	2.6499	4.21473e-15	2	aminotransferase, classes I and II, domain containing protein, expressed
LOC_Os04g48880	NA	NA	NA	NA	NA	NA	-2.29058	1.48348e-20	NA	NA	3	fatty acid hydroxylase, putative, expressed
LOC_Os04g48930	NA	NA	NA	NA	NA	NA	NA	NA	-3.06606	9.36985e-06	3	ferric-chelate reductase, putative, expressed
LOC_Os04g49210	NA	NA	NA	NA	4.78876	4.05434e-09	4.74448	2.46494e-09	2.72123	0.00112219	1	naringenin,2-oxoglutarate 3-dioxygenase, putative, expressed
LOC_Os04g49260	NA	NA	NA	NA	NA	NA	-3.96695	0.00099172	NA	NA	3	heavy metal-associated domain containing protein, expressed
LOC_Os04g49350	NA	NA	NA	NA	NA	NA	-4.07192	2.08632e-150	-2.43993	7.1415e-62	3	PPR repeat domain containing protein, putative, expressed
LOC_Os04g49360	NA	NA	6.044	1.90973e-23	4.31236	2.64809e-09	3.67812	4.17629e-07	NA	NA	1	OsFBX149 - F-box domain containing protein, expressed
LOC_Os04g49450	NA	NA	NA	NA	NA	NA	NA	NA	5.80437	3.66733e-114	1	MYB family transcription factor, putative, expressed
LOC_Os04g49900	NA	NA	NA	NA	NA	NA	NA	NA	-6.06915	0.00748845	3	ABC transporter family protein, putative, expressed
LOC_Os04g49970	NA	NA	NA	NA	NA	NA	NA	NA	3.92028	5.3163e-06	1	U-box, putative, expressed
LOC_Os04g50700	NA	NA	NA	NA	NA	NA	-2.09627	0.000145799	-3.38709	6.20245e-08	3	pathogenesis-related Bet v I family protein, putative, expressed
LOC_Os04g50940	6.85493	3.53469e-12	7.31498	1.25037e-14	7.1801	6.44951e-14	8.29819	2.37406e-20	5.86952	8.29433e-09	2	peptide transporter PTR2, putative, expressed
LOC_Os04g50950	2.88114	2.64416e-11	2.88826	5.45415e-11	2.48581	1.13808e-08	2.83092	7.09916e-12	2.50775	3.45799e-09	1	peptide transporter PTR2, putative, expressed
LOC_Os04g51030	NA	NA	NA	NA	NA	NA	2.13655	1.35184e-05	2.76795	1.39141e-08	1	wall-associated kinase 1, putative, expressed
LOC_Os04g51160	3.51146	5.25018e-14	3.04518	3.18096e-10	2.32224	6.42766e-06	2.35876	1.49817e-06	NA	NA	1	transposon protein, putative, unclassified, expressed
LOC_Os04g51450	NA	NA	NA	NA	NA	NA	NA	NA	-4.09041	1.21047e-15	1	glycosyl hydrolases family 16, putative, expressed
LOC_Os04g51454	NA	NA	NA	NA	NA	NA	NA	NA	-3.07277	1.06165e-29	1	expressed protein
LOC_Os04g51460	2.97807	0.037527	NA	NA	NA	NA	NA	NA	NA	NA	1	glycosyl hydrolases family 16, putative, expressed
LOC_Os04g51820	NA	NA	NA	NA	NA	NA	-3.08928	6.91246e-20	-3.9852	3.82639e-29	3	OsHKT1;1 - Na+ transporter, expressed
LOC_Os04g51830	2.92397	4.24654e-05	5.01393	1.17621e-18	5.16363	2.00931e-20	5.03454	3.00002e-20	3.90336	1.5149e-11	2	OsHKT1;4 - Na+ transporter, expressed
LOC_Os04g52190	NA	NA	NA	NA	NA	NA	NA	NA	2.32221	2.36503e-05	1	vacuolar-sorting receptor precursor, putative, expressed
LOC_Os04g52260	NA	NA	NA	NA	NA	NA	NA	NA	-2.94158	1.59418e-09	3	LTPL124 - Protease inhibitor/seed storage/LTP family protein precursor, expressed
LOC_Os04g52320	NA	NA	NA	NA	3.0334	0.000222728	3.29558	6.39347e-06	3.17346	2.41235e-05	1	QRT3, putative, expressed
LOC_Os04g52504	NA	NA	2.11216	1.76576e-19	2.42085	6.3443e-26	2.70067	7.48346e-33	NA	NA	1	adhesive/proline-rich protein, putative, expressed
LOC_Os04g52590	NA	NA	NA	NA	NA	NA	NA	NA	2.0519	1.91878e-10	1	protein kinase domain containing protein, expressed
LOC_Os04g52630	NA	NA	NA	NA	NA	NA	2.09883	1.56246e-19	NA	NA	1	leucine-rich repeat-containing protein kinase family protein, putative, expressed
LOC_Os04g52780	NA	NA	NA	NA	2.0241	1.00741e-13	2.2536	1.18961e-17	NA	NA	1	leucine-rich repeat receptor protein kinase EXS precursor, putative, expressed
LOC_Os04g52810	NA	NA	NA	NA	NA	NA	NA	NA	3.03172	0.000294942	1	no apical meristem protein, putative, expressed
LOC_Os04g53195	NA	NA	NA	NA	NA	NA	NA	NA	-2.23931	0.0145905	3	expressed protein
LOC_Os04g53210	NA	NA	NA	NA	NA	NA	NA	NA	2.12117	1.16554e-09	1	hydroxyacid oxidase 1, putative, expressed
LOC_Os04g53370	NA	NA	NA	NA	NA	NA	-3.39323	2.94753e-07	NA	NA	3	acyltransferase, putative, expressed
LOC_Os04g54002	NA	NA	NA	NA	NA	NA	NA	NA	-2.67193	0.000404803	3	serine/threonine-protein kinase receptor precursor, putative, expressed
LOC_Os04g54020	NA	NA	NA	NA	NA	NA	NA	NA	-4.02815	0.00050246	3	receptor-like kinase, putative, expressed
LOC_Os04g54080	NA	NA	NA	NA	2.95116	8.52175e-06	4.17079	1.79022e-11	3.83259	8.97306e-10	1	serine/threonine-protein kinase receptor precursor, putative, expressed
LOC_Os04g54140	NA	NA	NA	NA	NA	NA	NA	NA	3.72702	0.00499658	1	receptor-like kinase, putative, expressed
LOC_Os04g54180	NA	NA	NA	NA	NA	NA	NA	NA	-2.82447	0.0143457	1	serine/threonine-protein kinase receptor precursor, putative, expressed
LOC_Os04g54200	NA	NA	NA	NA	NA	NA	2.03681	1.33679e-21	NA	NA	1	diacylglycerol kinase, putative, expressed
LOC_Os04g54220	NA	NA	NA	NA	NA	NA	NA	NA	2.51713	0.00316377	1	expressed protein
LOC_Os04g54240	NA	NA	NA	NA	NA	NA	-2.53366	0.000410366	-2.31999	0.00385183	3	wound induced protein, putative, expressed
LOC_Os04g55120	NA	NA	NA	NA	NA	NA	NA	NA	4.37164	1.32908e-05	1	jp18, putative, expressed
LOC_Os04g55180	NA	NA	NA	NA	NA	NA	-3.05093	3.73664e-87	-4.16472	1.13463e-137	3	hydrolase, alpha/beta fold family domain containing protein, expressed
LOC_Os04g55740	NA	NA	NA	NA	NA	NA	NA	NA	2.26121	1.15269e-10	1	peroxidase precursor, putative, expressed
LOC_Os04g56030	3.64344	1.67877e-06	2.52404	0.0356636	3.2817	7.49068e-05	3.40706	4.35691e-06	NA	NA	1	glycine-rich cell wall structural protein precursor, putative, expressed
LOC_Os04g56040	4.58645	0.000105411	4.8777	4.13374e-05	4.56568	6.1073e-05	5.53694	3.2204e-09	NA	NA	2	glycine rich protein family protein, putative, expressed
LOC_Os04g56100	NA	NA	NA	NA	NA	NA	2.15857	5.97418e-07	NA	NA	1	one cut domain family member 3, putative, expressed
LOC_Os04g56120	NA	NA	NA	NA	NA	NA	3.8315	5.96991e-05	3.63224	0.000520466	1	protein kinase domain containing protein, expressed
LOC_Os04g56230	NA	NA	NA	NA	NA	NA	-3.55791	1.00738e-34	-3.63257	1.28195e-35	3	polyprenyl synthetase, putative, expressed
LOC_Os04g56240	NA	NA	NA	NA	NA	NA	-3.52325	3.82424e-44	-4.08751	1.59231e-55	3	lipase, putative, expressed
LOC_Os04g56400	NA	NA	NA	NA	NA	NA	-2.77868	7.44481e-40	NA	NA	3	glutamine synthetase, catalytic domain containing protein, expressed
LOC_Os04g56430	NA	NA	NA	NA	NA	NA	NA	NA	2.69691	0.000835494	1	cysteine-rich receptor-like protein kinase, putative, expressed
LOC_Os04g56900	NA	NA	7.51626	5.93126e-09	8.41421	2.83965e-12	8.90168	5.09309e-14	5.24598	0.0110142	2	transferase family protein, putative, expressed
LOC_Os04g56910	-2.15331	1.0092e-06	NA	NA	2.10299	2.55646e-08	2.6047	9.00648e-13	2.1127	1.21097e-08	1	transferase family protein, putative, expressed
LOC_Os04g56930	NA	NA	NA	NA	2.62748	0.00249124	3.03043	4.52078e-05	2.92975	0.000106115	1	glycosyl hydrolases, putative, expressed
LOC_Os04g57310	NA	NA	NA	NA	-2.1006	4.63291e-17	-3.3778	2.27246e-38	NA	NA	3	thiol-disulphide oxidoreductase DCC, putative, expressed
LOC_Os04g57860	NA	NA	3.3112	3.4075e-06	3.9388	4.0648e-10	4.22755	9.06235e-13	NA	NA	1	endoglucanase precursor, putative, expressed
LOC_Os04g57880	NA	NA	NA	NA	2.86681	2.06149e-16	8.50989	1.58993e-105	7.84281	2.73082e-94	2	heat shock protein DnaJ, putative, expressed
LOC_Os04g57940	NA	NA	NA	NA	NA	NA	2.19676	3.76104e-05	NA	NA	1	pentatricopeptide, putative, expressed
LOC_Os04g58090	4.8703	5.67762e-23	3.77457	9.52426e-13	3.91742	4.10713e-14	4.09603	2.36915e-16	2.55867	7.87525e-06	2	harpin-induced protein 1 domain containing protein, expressed
LOC_Os04g58200	NA	NA	NA	NA	NA	NA	NA	NA	-2.8951	1.45191e-09	1	protochlorophyllide reductase A, chloroplast precursor, putative, expressed
LOC_Os04g58220	2.21879	0.00271853	2.99172	2.05044e-06	2.8481	4.71906e-06	3.14858	5.88901e-08	NA	NA	1	transporter family protein, putative, expressed
LOC_Os04g58280	NA	NA	NA	NA	NA	NA	2.18258	4.85004e-13	NA	NA	1	stem-specific protein TSJT1, putative, expressed
LOC_Os04g58480	NA	NA	3.87615	4.12832e-05	NA	NA	NA	NA	NA	NA	1	EF hand family protein, putative, expressed
LOC_Os04g58710	NA	NA	NA	NA	NA	NA	-2.73359	2.26236e-19	-2.97282	2.8717e-22	3	AMP-binding domain containing protein, expressed
LOC_Os04g58810	3.55793	4.28768e-28	2.41483	9.08545e-14	NA	NA	2.15502	9.55999e-12	NA	NA	1	CAF1 family ribonuclease containing protein, putative, expressed
LOC_Os04g58920	4.59313	2.72926e-06	4.26301	6.23532e-05	3.79546	0.000648984	4.47935	1.07351e-06	3.84606	0.0001826	2	U-box domain-containing protein, putative, expressed
LOC_Os04g58980	NA	NA	NA	NA	NA	NA	2.34637	0.000222281	NA	NA	1	pentatricopeptide, putative, expressed
LOC_Os04g59190	NA	NA	NA	NA	2.45687	1.37473e-05	4.24096	1.82863e-15	3.46064	9.72834e-11	1	peroxidase precursor, putative, expressed
LOC_Os04g59200	NA	NA	NA	NA	3.84394	0.000411364	5.45094	2.83618e-07	2.90632	0.00781887	1	peroxidase precursor, putative, expressed
LOC_Os04g59380	NA	NA	NA	NA	NA	NA	NA	NA	2.26886	0.00126447	1	ZOS4-14 - C2H2 zinc finger protein, expressed
LOC_Os04g59440	NA	NA	NA	NA	NA	NA	-2.26945	4.86888e-17	-2.13986	3.48102e-15	3	chlorophyll A-B binding protein, putative, expressed
LOC_Os04g59540	NA	NA	NA	NA	-2.77648	7.88866e-09	-4.51039	8.70848e-19	-3.27489	5.03234e-12	3	phosphatidylinositol-4-phosphate 5-Kinase, putative, expressed
LOC_Os04g59610	NA	NA	NA	NA	NA	NA	-2.88208	4.70411e-33	-2.96643	1.56993e-34	3	expressed protein
LOC_Os05g01140	2.72648	6.96374e-05	NA	NA	NA	NA	-3.72598	0.00338195	NA	NA	3	methyltransferase, putative, expressed
LOC_Os05g01380	NA	NA	NA	NA	2.82963	2.39579e-10	3.53611	9.1699e-17	3.06633	1.3353e-12	1	polygalacturonase inhibitor precursor, putative, expressed
LOC_Os05g01530	NA	NA	NA	NA	NA	NA	-2.87636	2.44211e-26	NA	NA	3	expressed protein
LOC_Os05g02140	2.15155	0.00109479	2.16884	0.000763022	NA	NA	2.353	2.73548e-05	NA	NA	1	clathrin assembly protein, putative, expressed
LOC_Os05g02210	NA	NA	NA	NA	NA	NA	2.11389	1.83475e-06	NA	NA	1	pentatricopeptide, putative, expressed
LOC_Os05g02530	NA	NA	NA	NA	NA	NA	NA	NA	-2.15106	1.59312e-15	3	glutathione S-transferase, N-terminal domain containing protein, expressed
LOC_Os05g02580	NA	NA	NA	NA	3.69581	0.0163615	4.10746	0.000833565	3.66727	0.00803887	1	expressed protein
LOC_Os05g03620	2.30275	4.05397e-15	NA	NA	NA	NA	NA	NA	NA	NA	1	TKL_IRAK_CR4L.4 - The CR4L subfamily has homology with Crinkly4, expressed
LOC_Os05g04490	NA	NA	2.58252	0.0304993	4.6451	5.56411e-09	5.72898	3.46354e-14	5.56457	3.10049e-13	1	peroxidase precursor, putative, expressed
LOC_Os05g04680	6.73159	6.53883e-07	5.61116	0.00305387	5.69399	0.000981603	NA	NA	5.05926	0.0118499	2	expressed protein
LOC_Os05g04930	NA	NA	NA	NA	NA	NA	3.90701	8.66338e-05	4.67847	6.67667e-07	1	transferase family protein, putative, expressed
LOC_Os05g05060	NA	NA	NA	NA	NA	NA	2.86257	3.6838e-13	3.59085	5.04543e-20	1	expressed protein
LOC_Os05g05270	NA	NA	2.36738	2.05811e-05	NA	NA	2.60791	6.40189e-08	2.7246	1.01258e-08	1	sucrose-phosphatase, putative, expressed
LOC_Os05g05290	NA	NA	2.73038	2.28361e-06	2.93987	2.3409e-08	2.11917	0.000265607	NA	NA	1	expressed protein
LOC_Os05g05600	NA	NA	NA	NA	NA	NA	-2.82271	5.47755e-98	-4.32834	4.16808e-202	3	ATA15 protein, putative, expressed
LOC_Os05g06380	NA	NA	NA	NA	5.23518	0.0165733	5.72202	0.00128393	NA	NA	1	transferase family protein, putative, expressed
LOC_Os05g06390	NA	NA	NA	NA	5.85067	1.60479e-09	6.38891	5.07309e-13	5.76718	3.77312e-10	1	retrotransposon protein, putative, unclassified, expressed
LOC_Os05g06399	NA	NA	NA	NA	NA	NA	-3.82279	0.00081976	-3.86785	0.000140957	3	expressed protein
LOC_Os05g06780	NA	NA	NA	NA	NA	NA	NA	NA	-2.24662	1.51801e-07	3	LTPL104 - Protease inhibitor/seed storage/LTP family protein precursor, expressed
LOC_Os05g06890	NA	NA	NA	NA	NA	NA	-2.15324	2.16676e-43	NA	NA	3	relA-SpoT like protein RSH4, putative, expressed
LOC_Os05g06920	NA	NA	NA	NA	-3.15461	0.000867697	-6.46377	2.23375e-11	-6.51873	4.38125e-11	3	relA-SpoT like protein RSH4, putative, expressed
LOC_Os05g07010	8.42883	1.76764e-17	NA	NA	NA	NA	NA	NA	NA	NA	1	myb-like DNA-binding domain containing protein, expressed
LOC_Os05g07120	2.98021	0.0110684	3.01521	0.00715887	NA	NA	NA	NA	NA	NA	1	basic helix-loop-helix, putative, expressed
LOC_Os05g07280	NA	NA	NA	NA	NA	NA	2.60876	0.0026535	NA	NA	1	expressed protein
LOC_Os05g07450	NA	NA	NA	NA	NA	NA	2.01702	0.000203562	3.29429	3.444e-10	1	S-domain receptor-like protein kinase, putative, expressed
LOC_Os05g07870	NA	NA	NA	NA	NA	NA	-2.1671	8.07589e-42	-2.53986	5.09013e-56	3	triose phosphate/phosphate translocator, non-green plastid,chloroplast precursor, putative, expressed
LOC_Os05g07890	NA	NA	NA	NA	NA	NA	NA	NA	-2.05516	0.000673902	3	embryo-specific 3, putative, expressed
LOC_Os05g07940	NA	NA	NA	NA	NA	NA	NA	NA	-2.19693	8.75516e-17	1	glyoxalase family protein, putative, expressed
LOC_Os05g08480	NA	NA	NA	NA	-3.88586	0.0172911	NA	NA	-4.33746	0.00114112	3	cytokinin-O-glucosyltransferase 1, putative, expressed
LOC_Os05g08830	6.99587	2.5672e-19	4.38692	0.000960407	5.50936	1.12196e-09	5.91397	1.01493e-11	NA	NA	2	expressed protein
LOC_Os05g08860	2.95954	6.49372e-08	2.84354	4.86037e-07	NA	NA	NA	NA	NA	NA	1	expressed protein
LOC_Os05g09280	NA	NA	2.47699	0.0128609	2.32349	0.0122503	NA	NA	NA	NA	1	AGAP006957-PA, putative, expressed
LOC_Os05g09440	NA	NA	3.31102	6.68535e-62	2.7197	2.85913e-43	NA	NA	NA	NA	1	NADP-dependent malic enzyme, chloroplast precursor, putative, expressed
LOC_Os05g09724	NA	NA	NA	NA	-2.5595	6.95635e-05	-4.60904	7.91353e-09	-7.07488	1.15908e-09	3	HAD superfamily phosphatase, putative, expressed
LOC_Os05g10230	NA	NA	NA	NA	NA	NA	NA	NA	-2.07639	0.0051737	3	transposon protein, putative, CACTA, En/Spm sub-class, expressed
LOC_Os05g10370	3.98171	0.000826372	5.10297	1.89379e-06	3.66057	0.00126689	NA	NA	NA	NA	1	acid phosphatase, putative, expressed
LOC_Os05g10650	2.98803	8.27102e-24	2.03658	5.13971e-11	2.12927	2.53559e-12	2.0869	2.27794e-12	NA	NA	1	6-phosphofructokinase, putative, expressed
LOC_Os05g11320	NA	NA	NA	NA	NA	NA	NA	NA	-4.17432	0.000427353	3	metallothionein-like protein 3B, putative, expressed
LOC_Os05g11510	NA	NA	NA	NA	NA	NA	-2.04547	1.40341e-17	NA	NA	3	B-box zinc finger family protein, putative, expressed
LOC_Os05g11620	NA	NA	NA	NA	NA	NA	-4.521	0.000859061	-3.53147	0.00339604	3	expressed protein
LOC_Os05g11650	NA	NA	NA	NA	NA	NA	-2.16379	0.000665747	NA	NA	3	GIL1, putative, expressed
LOC_Os05g12040	3.76969	4.14582e-06	3.33151	7.66702e-05	NA	NA	NA	NA	-2.42415	0.0134842	1	cytochrome P450 51, putative, expressed
LOC_Os05g12481	NA	NA	NA	NA	NA	NA	2.04169	4.1204e-18	NA	NA	1	expressed protein
LOC_Os05g12550	NA	NA	NA	NA	3.50501	0.0184887	NA	NA	NA	NA	1	retrotransposon, putative, centromere-specific, expressed
LOC_Os05g12630	NA	NA	NA	NA	-3.07431	1.39938e-06	-4.26814	1.22181e-11	-6.53702	9.07631e-17	3	expressed protein
LOC_Os05g13360	NA	NA	NA	NA	-3.25965	8.35633e-09	-5.43527	4.80986e-16	-3.26121	2.87231e-10	3	expressed protein
LOC_Os05g13970	NA	NA	6.05074	0.00268698	9.01934	2.10302e-11	9.17009	3.54297e-12	8.02133	4.73056e-08	2	phosphorylase domain containing protein, putative, expressed
LOC_Os05g14240	NA	NA	NA	NA	NA	NA	2.94792	6.12033e-50	NA	NA	1	aquaporin protein, putative, expressed
LOC_Os05g14270	NA	NA	NA	NA	NA	NA	NA	NA	-2.004	1.2311e-13	3	expressed protein
LOC_Os05g15230	2.84138	1.70425e-05	2.05547	0.0162869	NA	NA	NA	NA	NA	NA	1	plant protein of unknown function domain containing protein, expressed
LOC_Os05g15300	NA	NA	NA	NA	2.03916	0.030137	2.72834	0.000175398	NA	NA	1	expressed protein
LOC_Os05g15630	NA	NA	NA	NA	NA	NA	NA	NA	2.14838	0.000750752	1	membrane associated DUF588 domain containing protein, putative, expressed
LOC_Os05g16824	NA	NA	2.29661	1.08745e-53	NA	NA	NA	NA	NA	NA	1	SHR5-receptor-like kinase, putative, expressed
LOC_Os05g17604	NA	NA	NA	NA	NA	NA	2.20563	7.92227e-05	3.02245	2.44079e-08	1	SHR5-receptor-like kinase, putative, expressed
LOC_Os05g20100	NA	NA	NA	NA	NA	NA	NA	NA	2.53314	2.82542e-06	1	glycerol-3-phosphate acyltransferase, putative, expressed
LOC_Os05g20450	NA	NA	NA	NA	NA	NA	-2.22627	2.2133e-07	-5.28102	9.73461e-19	3	retrotransposon protein, putative, unclassified, expressed
LOC_Os05g22614	NA	NA	NA	NA	NA	NA	NA	NA	-3.04844	8.35765e-44	3	PTAC16, putative, expressed
LOC_Os05g23924	NA	NA	NA	NA	NA	NA	NA	NA	5.21738	0.0130137	1	glycosyl hydrolase family 10 protein, putative, expressed
LOC_Os05g24650	NA	NA	NA	NA	NA	NA	NA	NA	-2.57305	3.67913e-12	3	DUF567 domain containing protein, putative, expressed
LOC_Os05g24660	NA	NA	NA	NA	NA	NA	6.56757	9.15984e-05	NA	NA	1	IPP transferase, putative, expressed
LOC_Os05g24780	NA	NA	NA	NA	NA	NA	2.69794	0.00071178	NA	NA	1	OsCML21 - Calmodulin-related calcium sensor protein, expressed
LOC_Os05g24890	NA	NA	NA	NA	NA	NA	3.93053	0.000935408	3.46465	0.00424139	1	tetratricopeptide-like helical, putative, expressed
LOC_Os05g25370	NA	NA	NA	NA	NA	NA	NA	NA	-3.34146	0.000126675	3	TKL_IRAK_CrRLK1L-1.2 - The CrRLK1L-1 subfamily has homology to the CrRLK1L homolog, expressed
LOC_Os05g25390	NA	NA	NA	NA	2.1755	1.04352e-09	2.73198	6.972e-16	NA	NA	1	tyrosine protein kinase domain containing protein, putative, expressed
LOC_Os05g25920	3.796	7.82822e-27	2.49992	6.16011e-11	2.38113	2.96607e-10	2.57167	1.199e-12	NA	NA	1	expressed protein
LOC_Os05g28210	NA	NA	NA	NA	NA	NA	NA	NA	-4.18392	0.0061497	3	small hydrophilic plant seed protein, putative, expressed
LOC_Os05g29680	NA	NA	NA	NA	NA	NA	NA	NA	-2.2411	0.00385183	3	expressed protein
LOC_Os05g30010	NA	NA	NA	NA	NA	NA	NA	NA	2.56155	4.80225e-11	1	WD domain, G-beta repeat domain containing protein, expressed
LOC_Os05g30250	NA	NA	NA	NA	-2.16342	1.75187e-14	-3.65084	2.2288e-36	NA	NA	3	Os5bglu19 - beta-glucosidase homologue, similar to G. max isohydroxyurate hydrolase, expressed
LOC_Os05g30510	NA	NA	NA	NA	5.21344	0.0113849	NA	NA	NA	NA	1	expressed protein
LOC_Os05g30760	NA	NA	3.03355	1.08808e-10	2.49949	1.1985e-07	2.85453	3.35353e-10	NA	NA	1	esterase, putative, expressed
LOC_Os05g31160	NA	NA	NA	NA	NA	NA	NA	NA	3.45848	1.09511e-11	1	peptide chain release factor 2, putative, expressed
LOC_Os05g31670	NA	NA	NA	NA	NA	NA	NA	NA	-3.9362	0.00675348	3	AWPM-19-like membrane family protein, putative, expressed
LOC_Os05g31760	NA	NA	NA	NA	NA	NA	-2.09779	2.55153e-14	NA	NA	3	annexin, putative, expressed
LOC_Os05g31890	NA	NA	NA	NA	NA	NA	2.50016	0.00110207	3.96452	2.07443e-07	1	aspartyl protease family protein, putative, expressed
LOC_Os05g31970	5.00608	4.72506e-06	NA	NA	NA	NA	NA	NA	NA	NA	1	expressed protein
LOC_Os05g33130	NA	NA	NA	NA	NA	NA	NA	NA	3.69219	9.97626e-05	1	CHIT17 - Chitinase family protein precursor, expressed
LOC_Os05g33160	2.96323	0.000803759	3.26878	0.000102998	NA	NA	2.55986	0.00171648	NA	NA	1	inactive receptor kinase At1g27190 precursor, putative, expressed
LOC_Os05g33400	6.49976	1.74099e-40	4.9988	2.45286e-16	3.44366	3.89052e-05	3.50881	4.80243e-06	NA	NA	1	basic 7S globulin precursor, putative, expressed
LOC_Os05g33410	6.24014	4.9154e-05	6.17537	6.23532e-05	NA	NA	NA	NA	NA	NA	1	xylanase inhibitor, putative, expressed
LOC_Os05g33480	NA	NA	NA	NA	-2.49826	0.0099192	-3.81359	1.07344e-05	-2.99539	0.000125719	3	retrotransposon protein, putative, unclassified, expressed
LOC_Os05g33570	NA	NA	NA	NA	NA	NA	-2.13457	5.53282e-28	NA	NA	3	pyruvate, phosphate dikinase, chloroplast precursor, putative, expressed
LOC_Os05g33840	NA	NA	NA	NA	NA	NA	NA	NA	-3.2447	9.3597e-19	3	transketolase, putative, expressed
LOC_Os05g33960	NA	NA	2.54874	0.00284056	NA	NA	NA	NA	2.40221	0.00180616	1	peptide transporter PTR2, putative, expressed
LOC_Os05g34570	NA	NA	NA	NA	NA	NA	2.297	0.00335485	NA	NA	1	pentatricopeptide, putative, expressed
LOC_Os05g35290	NA	NA	2.4786	4.97137e-32	2.42378	7.77252e-31	2.23424	3.38027e-27	NA	NA	1	phenylalanine ammonia-lyase, putative, expressed
LOC_Os05g35430	NA	NA	NA	NA	-2.05974	0.0131482	NA	NA	NA	NA	3	expressed protein
LOC_Os05g35500	NA	NA	NA	NA	NA	NA	3.66116	2.24361e-30	NA	NA	1	MYB family transcription factor, putative, expressed
LOC_Os05g35930	NA	NA	NA	NA	NA	NA	NA	NA	2.02708	0.0012126	1	expressed protein
LOC_Os05g36010	NA	NA	NA	NA	NA	NA	-2.02314	3.76662e-08	-2.83807	2.49699e-14	3	OsSub47 - Putative Subtilisin homologue, expressed
LOC_Os05g36090	NA	NA	NA	NA	NA	NA	NA	NA	2.1326	0.0032279	1	zinc finger DHHC domain-containing protein, putative, expressed
LOC_Os05g36260	2.37137	2.45988e-06	3.27262	2.11372e-12	NA	NA	NA	NA	NA	NA	1	soluble inorganic pyrophosphatase, putative, expressed
LOC_Os05g37060	4.87034	0.000458755	4.93848	0.000152243	3.49045	0.012872	NA	NA	NA	NA	1	MYB family transcription factor, putative, expressed
LOC_Os05g37950	NA	NA	NA	NA	NA	NA	3.34192	1.5902e-90	2.10559	3.44715e-36	1	guanylyl cyclase, putative, expressed
LOC_Os05g38140	NA	NA	NA	NA	NA	NA	NA	NA	2.96607	6.92424e-14	1	basic helix-loop-helix DND-binding domain containing protein, expressed
LOC_Os05g38270	NA	NA	NA	NA	NA	NA	-3.58016	7.29477e-101	-4.51078	2.31821e-136	3	regulator of chromosome condensation, putative, expressed
LOC_Os05g38290	NA	NA	NA	NA	NA	NA	NA	NA	-4.36659	7.06221e-11	3	protein phosphatase 2C, putative, expressed
LOC_Os05g38490	NA	NA	NA	NA	NA	NA	-2.51848	4.32392e-17	NA	NA	3	growth regulator related protein, putative, expressed
LOC_Os05g38500	NA	NA	NA	NA	NA	NA	-2.17453	0.000170037	NA	NA	3	fasciclin-like arabinogalactan protein, putative, expressed
LOC_Os05g38530	NA	NA	NA	NA	NA	NA	-3.00488	2.70497e-36	NA	NA	3	DnaK family protein, putative, expressed
LOC_Os05g38680	NA	NA	NA	NA	NA	NA	NA	NA	-6.10061	3.26402e-24	3	plant-specific domain TIGR01589 family protein, expressed
LOC_Os05g38790	NA	NA	NA	NA	NA	NA	-3.59899	1.04478e-08	NA	NA	3	IQ calmodulin-binding motif domain containing protein, expressed
LOC_Os05g38860	NA	NA	NA	NA	NA	NA	NA	NA	2.34582	0.000102542	1	expressed protein
LOC_Os05g38880	NA	NA	NA	NA	3.78033	0.00999682	4.25653	0.000229704	4.63123	1.53374e-05	1	expressed protein
LOC_Os05g39560	NA	NA	NA	NA	NA	NA	NA	NA	5.52517	0.00130297	1	metal cation transporter, putative, expressed
LOC_Os05g39580	NA	NA	NA	NA	2.99603	3.16499e-08	3.91062	1.07775e-13	2.7725	1.98854e-07	1	bet v I allergen family protein, putative, expressed
LOC_Os05g39720	4.98699	5.5176e-27	3.56743	6.73237e-14	2.40952	2.22711e-06	2.78333	4.95913e-09	NA	NA	1	WRKY70, expressed
LOC_Os05g39990	NA	NA	NA	NA	NA	NA	NA	NA	3.80082	0.00022743	1	expansin precursor, putative, expressed
LOC_Os05g40020	NA	NA	NA	NA	4.20646	3.21456e-11	7.02606	2.69488e-39	3.0245	3.58824e-05	1	RING-H2 finger protein, putative, expressed
LOC_Os05g40700	NA	NA	NA	NA	NA	NA	2.30432	8.60426e-11	NA	NA	1	transmembrane protein 56, putative, expressed
LOC_Os05g40770	NA	NA	NA	NA	NA	NA	2.21532	5.86662e-14	NA	NA	1	leucine-rich repeat family protein, putative, expressed
LOC_Os05g41370	NA	NA	NA	NA	2.64633	0.0293872	3.25675	0.00122738	2.89682	0.00749479	1	TKL_IRAK_DUF26-la.1 - DUF26 kinases have homology to DUF26 containing loci, expressed
LOC_Os05g41590	2.4725	1.17265e-13	NA	NA	NA	NA	NA	NA	NA	NA	1	glycerol-3-phosphate dehydrogenase, putative, expressed
LOC_Os05g41760	2.39119	0.0490035	NA	NA	NA	NA	NA	NA	NA	NA	1	AP2 domain containing protein, expressed
LOC_Os05g41820	NA	NA	NA	NA	NA	NA	-2.10606	2.47866e-05	NA	NA	3	expressed protein
LOC_Os05g42250	NA	NA	NA	NA	NA	NA	NA	NA	-2.504	6.7908e-09	3	cyclic nucleotide-gated ion channel 2, putative, expressed
LOC_Os05g43310	NA	NA	NA	NA	NA	NA	NA	NA	-3.85935	1.43243e-106	3	photosystem II reaction center W protein, chloroplast precursor, putative, expressed
LOC_Os05g43650	NA	NA	NA	NA	NA	NA	-3.0379	1.33932e-87	-2.36437	5.30242e-58	3	expressed protein
LOC_Os05g43910	NA	NA	NA	NA	NA	NA	-3.20652	9.83864e-30	NA	NA	3	cytochrome P450, putative, expressed
LOC_Os05g44060	2.24071	0.000684242	2.64569	1.60673e-05	NA	NA	NA	NA	NA	NA	1	expressed protein
LOC_Os05g44300	NA	NA	NA	NA	NA	NA	-3.31844	2.92044e-16	-4.07822	2.97098e-22	3	plant-specific domain TIGR01615 family protein, expressed
LOC_Os05g44340	NA	NA	NA	NA	-2.52614	1.77626e-09	-3.90593	5.24469e-19	-3.56582	2.61997e-17	3	heat shock protein 101, putative, expressed
LOC_Os05g44900	2.28617	1.24225e-12	NA	NA	NA	NA	NA	NA	NA	NA	1	expressed protein
LOC_Os05g45020	NA	NA	NA	NA	2.12926	1.11209e-07	3.09257	1.2184e-16	NA	NA	1	zinc finger/CCCH transcription factor, putative, expressed
LOC_Os05g45100	3.8814	0.002781	5.74939	4.01774e-11	4.85209	1.89209e-07	NA	NA	NA	NA	2	anthocyanidin 5,3-O-glucosyltransferase, putative, expressed
LOC_Os05g45370	NA	NA	NA	NA	NA	NA	-2.2258	1.64608e-05	NA	NA	3	cell cycle control protein, putative, expressed
LOC_Os05g45380	NA	NA	NA	NA	NA	NA	-2.19742	0.00386815	NA	NA	3	expressed protein
LOC_Os05g45440	NA	NA	NA	NA	NA	NA	NA	NA	-2.103	1.40122e-06	3	expressed protein
LOC_Os05g45954	NA	NA	NA	NA	NA	NA	-2.10471	2.43575e-09	NA	NA	3	AP2 domain containing protein, expressed
LOC_Os05g46000	NA	NA	NA	NA	NA	NA	2.01669	5.88631e-18	NA	NA	1	ras-related protein, putative, expressed
LOC_Os05g46020	2.9478	8.32984e-26	NA	NA	NA	NA	NA	NA	NA	NA	1	WRKY7, expressed
LOC_Os05g46520	NA	NA	NA	NA	NA	NA	3.01519	2.06842e-67	NA	NA	1	polygalacturonase, putative, expressed
LOC_Os05g46750	6.33734	1.49343e-05	NA	NA	NA	NA	NA	NA	NA	NA	1	STE_MEKK_ste11_MAP3K.18 - STE kinases include homologs to sterile 7, sterile 11 and sterile 20 from yeast, expressed
LOC_Os05g46760	3.17252	4.5681e-11	NA	NA	NA	NA	NA	NA	-2.13216	0.0155058	1	STE_MEKK_ste11_MAP3K.19 - STE kinases include homologs to sterile 7, sterile 11 and sterile 20 from yeast, expressed
LOC_Os05g46790	5.53535	2.91579e-18	6.42594	2.1065e-25	6.77641	3.44986e-29	5.92046	1.80026e-22	3.22112	4.67212e-05	2	expressed protein
LOC_Os05g46840	3.88097	8.68217e-21	3.14437	1.78685e-13	2.11027	3.63365e-06	2.06846	2.4853e-06	NA	NA	1	proline-rich protein, putative, expressed
LOC_Os05g47560	NA	NA	NA	NA	NA	NA	NA	NA	-2.62975	7.24085e-116	3	serine/threonine-protein kinase SNT7, chloroplast precursor, putative, expressed
LOC_Os05g47730	NA	NA	NA	NA	-2.69692	0.013837	-3.61187	0.000999031	-6.08837	0.000170257	3	LTPL153 - Protease inhibitor/seed storage/LTP family protein precursor, expressed
LOC_Os05g47750	NA	NA	2.11509	0.0412834	NA	NA	NA	NA	NA	NA	1	Ser/Thr protein kinase, putative, expressed
LOC_Os05g47770	2.07387	1.2529e-10	2.24967	2.03012e-12	2.02885	2.55314e-10	NA	NA	NA	NA	1	serine/threonine-protein kinase At1g18390 precursor, putative, expressed
LOC_Os05g47780	NA	NA	NA	NA	NA	NA	NA	NA	-2.31424	6.04938e-06	3	E3 ubiquitin ligase, putative, expressed
LOC_Os05g47960	3.37097	8.09909e-32	2.57642	2.73265e-16	NA	NA	NA	NA	NA	NA	1	expressed protein
LOC_Os05g48160	NA	NA	NA	NA	NA	NA	-2.70356	2.97762e-36	NA	NA	3	2Fe-2S iron-sulfur cluster binding domain containing protein, expressed
LOC_Os05g48200	NA	NA	NA	NA	3.07359	2.97672e-31	5.34087	1.40183e-80	NA	NA	1	glutamate synthase, chloroplast precursor, putative, expressed
LOC_Os05g48630	NA	NA	NA	NA	NA	NA	NA	NA	-3.94946	3.44715e-36	3	expressed protein
LOC_Os05g48640	NA	NA	NA	NA	NA	NA	NA	NA	-2.99888	0.000392733	1	ATROPGEF7/ROPGEF7, putative, expressed
LOC_Os05g48680	2.06601	4.0558e-06	3.55129	2.47438e-20	3.0432	6.11088e-15	3.32301	6.21567e-19	NA	NA	1	expressed protein
LOC_Os05g49060	NA	NA	NA	NA	NA	NA	2.37903	9.85182e-10	NA	NA	1	uncharacterized protein ycf23, putative, expressed
LOC_Os05g49140	2.19739	6.35285e-27	NA	NA	NA	NA	NA	NA	NA	NA	1	CGMC_MAPKCMGC_2.8 - CGMC includes CDA, MAPK, GSK3, and CLKC kinases, expressed
LOC_Os05g49320	NA	NA	NA	NA	-2.91987	1.03331e-08	-2.38299	1.85155e-07	NA	NA	3	ribosomal protein L7/L12 C-terminal domain containing protein, expressed
LOC_Os05g49620	NA	NA	NA	NA	2.01075	0.031261	2.44107	0.00210449	NA	NA	1	WRKY19, expressed
LOC_Os05g49940	NA	NA	3.30034	1.0574e-17	4.11951	9.55683e-29	4.19934	4.8949e-31	2.31749	6.0188e-09	1	expressed protein
LOC_Os05g50100	2.08494	1.04471e-17	2.34183	5.80212e-22	2.24075	2.05595e-20	2.23427	5.58875e-21	NA	NA	1	expressed protein
LOC_Os05g50180	3.15489	4.05398e-06	2.49794	0.00339092	NA	NA	2.27853	0.00165318	NA	NA	1	OsCML14 - Calmodulin-related calcium sensor protein, expressed
LOC_Os05g50500	NA	NA	NA	NA	-2.2493	0.00317537	-5.5405	5.44042e-12	-10.0716	1.40744e-16	3	secretory protein, putative, expressed
LOC_Os05g50550	NA	NA	NA	NA	NA	NA	-2.58659	1.65354e-23	NA	NA	3	polyprenyl synthetase, putative, expressed
LOC_Os05g50570	2.78304	7.8211e-10	NA	NA	NA	NA	NA	NA	-2.07083	0.0145838	1	OsSCP29 - Putative Serine Carboxypeptidase homologue, expressed
LOC_Os05g50580	6.08633	1.83446e-17	NA	NA	NA	NA	NA	NA	NA	NA	1	OsSCP30 - Putative Serine Carboxypeptidase homologue, expressed
LOC_Os05g50730	NA	NA	2.26878	1.80648e-05	2.27842	2.94617e-06	2.33944	3.57122e-07	NA	NA	1	expressed protein
LOC_Os05g50770	7.53382	7.03818e-11	7.09824	3.16831e-09	7.61248	1.22159e-11	9.02137	1.73007e-21	6.52472	7.30768e-06	2	C4-dicarboxylate transporter/malic acid transport protein, expressed
LOC_Os05g50850	NA	NA	NA	NA	-2.27563	1.00748e-10	-3.59447	2.3339e-23	NA	NA	3	expressed protein
LOC_Os05g50930	NA	NA	NA	NA	-2.01368	2.28609e-29	-5.1944	1.99541e-141	-2.87339	1.27927e-57	3	RNA polymerase sigma factor, putative, expressed
LOC_Os05g51040	NA	NA	NA	NA	NA	NA	-3.13287	0.000618747	NA	NA	3	tesmin/TSO1-like CXC domain containing protein, expressed
LOC_Os05g51150	NA	NA	NA	NA	2.78553	2.39419e-74	4.29246	1.06405e-162	NA	NA	1	RNA polymerase sigma factor, putative, expressed
LOC_Os05g51390	5.55707	0.00539967	NA	NA	NA	NA	NA	NA	NA	NA	1	uncharacterized protein PA4923, putative, expressed
LOC_Os05g51470	NA	NA	NA	NA	NA	NA	NA	NA	-2.9463	8.39139e-12	3	2-aminoethanethiol dioxygenase, putative, expressed
LOC_Os06g01210	NA	NA	NA	NA	NA	NA	NA	NA	-3.20643	6.57883e-41	3	plastocyanin, chloroplast precursor, putative, expressed
LOC_Os06g01250	NA	NA	NA	NA	-3.15068	2.14445e-06	-3.14021	1.02291e-06	NA	NA	3	cytochrome P450, putative, expressed
LOC_Os06g01790	NA	NA	NA	NA	NA	NA	NA	NA	-2.13856	0.00126777	3	expressed protein
LOC_Os06g02520	NA	NA	NA	NA	NA	NA	NA	NA	6.15285	0.000127577	1	interacting protein of DMI3, putative, expressed
LOC_Os06g02840	NA	NA	NA	NA	NA	NA	-2.05573	0.00456974	NA	NA	3	expressed protein
LOC_Os06g03520	NA	NA	NA	NA	NA	NA	2.18762	2.4965e-13	2.59679	4.33725e-18	1	DUF581 domain containing protein, expressed
LOC_Os06g03810	2.82361	4.8368e-06	2.57863	6.8593e-05	3.02278	2.69262e-07	3.11587	3.7327e-08	NA	NA	1	expressed protein
LOC_Os06g04070	NA	NA	NA	NA	NA	NA	NA	NA	-2.00639	3.87066e-23	1	pyridoxal-dependent decarboxylase protein, putative, expressed
LOC_Os06g04210	NA	NA	NA	NA	NA	NA	NA	NA	-3.82081	5.58482e-06	3	expressed protein
LOC_Os06g04220	4.88588	1.73539e-21	4.24213	7.45936e-15	2.80194	2.34918e-05	3.46086	4.98637e-10	NA	NA	1	expressed protein
LOC_Os06g04230	2.2908	1.83615e-13	2.13205	1.66624e-11	NA	NA	NA	NA	NA	NA	1	expressed protein
LOC_Os06g04240	4.85244	1.13549e-39	3.57587	4.46022e-19	NA	NA	NA	NA	NA	NA	1	expressed protein
LOC_Os06g05420	NA	NA	2.72028	1.62728e-14	NA	NA	NA	NA	NA	NA	1	expressed protein
LOC_Os06g05470	2.61375	0.00289818	NA	NA	NA	NA	NA	NA	NA	NA	1	expressed protein
LOC_Os06g06250	NA	NA	NA	NA	5.29479	3.94711e-07	NA	NA	NA	NA	1	GDSL-like lipase/acylhydrolase, putative, expressed
LOC_Os06g06300	NA	NA	NA	NA	-2.37648	0.00115502	-3.18685	1.24067e-06	-2.76843	1.69258e-05	3	osFTL3 FT-Like3 homologous to Flowering Locus T gene; contains Pfam profile PF01161: Phosphatidylethanolamine-binding protein, expressed
LOC_Os06g06320	NA	NA	NA	NA	NA	NA	-3.5426	2.193e-06	-2.54906	0.000515439	3	osFTL2 FT-Like2 homologous to Flowering Locus T gene; contains Pfam profile PF01161: Phosphatidylethanolamine-binding protein, expressed
LOC_Os06g06360	4.28562	1.46188e-37	4.3165	1.79306e-37	2.66896	9.07044e-13	2.82516	4.86796e-15	2.1679	3.07626e-08	1	WRKY113, expressed
LOC_Os06g06670	NA	NA	NA	NA	NA	NA	NA	NA	2.29118	1.64428e-07	1	expressed protein
LOC_Os06g06900	2.18495	8.88617e-05	NA	NA	NA	NA	NA	NA	2.29271	5.0319e-06	1	helix-loop-helix DNA-binding domain containing protein, expressed
LOC_Os06g06930	NA	NA	3.61989	1.3821e-10	4.42578	5.5973e-20	4.45418	4.25092e-21	2.50372	0.000205493	1	receptor-like protein kinase, putative, expressed
LOC_Os06g07200	NA	NA	NA	NA	NA	NA	2.05814	2.28701e-39	NA	NA	1	syntaxin, putative, expressed
LOC_Os06g07330	NA	NA	NA	NA	NA	NA	5.65966	2.72481e-07	5.86189	7.65096e-08	1	OsWAK63 - OsWAK receptor-like protein kinase, expressed
LOC_Os06g07600	NA	NA	NA	NA	NA	NA	2.04764	2.11317e-12	NA	NA	1	uncharacterized glycosyltransferase, putative, expressed
LOC_Os06g07969	NA	NA	-8.03554	0.0473321	NA	NA	NA	NA	NA	NA	3	cytochrome b-c1 complex subunit 8, putative, expressed
LOC_Os06g08350	5.29189	0.0359237	5.67845	0.00364764	4.86788	0.0467675	NA	NA	NA	NA	2	expressed protein
LOC_Os06g09220	NA	NA	NA	NA	NA	NA	NA	NA	2.05072	0.00797598	1	cytochrome P450 72A1, putative, expressed
LOC_Os06g09310	3.99469	3.10808e-20	3.09803	5.45853e-12	2.61622	8.01091e-09	3.0404	1.70658e-12	NA	NA	1	zinc finger, C3HC4 type domain containing protein, expressed
LOC_Os06g09610	NA	NA	NA	NA	NA	NA	-2.48515	7.84294e-16	NA	NA	3	peroxiredoxin, putative, expressed
LOC_Os06g09880	NA	NA	NA	NA	NA	NA	2.04313	8.96659e-22	NA	NA	1	EMB1270, putative, expressed
LOC_Os06g09980	2.11537	1.58033e-08	NA	NA	NA	NA	NA	NA	NA	NA	1	expressed protein
LOC_Os06g10160	2.93946	2.62973e-56	NA	NA	NA	NA	NA	NA	NA	NA	1	tyrosine protein kinase domain containing protein, putative, expressed
LOC_Os06g10210	4.3064	1.02908e-85	2.53417	5.45094e-31	NA	NA	NA	NA	NA	NA	1	expressed protein
LOC_Os06g10350	NA	NA	NA	NA	NA	NA	NA	NA	3.08052	1.80006e-07	1	MYB family transcription factor, putative, expressed
LOC_Os06g10850	NA	NA	4.01126	5.59762e-09	4.51061	2.04105e-12	5.26213	1.29877e-17	3.08406	5.74062e-06	1	lipase, putative, expressed
LOC_Os06g11030	5.63443	0.00391619	NA	NA	NA	NA	NA	NA	NA	NA	1	EF hand family protein, putative, expressed
LOC_Os06g11150	2.519	1.19146e-28	NA	NA	NA	NA	NA	NA	NA	NA	1	DUF1645 domain containing protein, putative, expressed
LOC_Os06g11200	4.30028	3.80081e-12	4.55036	9.01499e-14	2.9608	0.000107821	2.33729	0.00330343	NA	NA	1	12-oxophytodienoate reductase, putative, expressed
LOC_Os06g11210	NA	NA	NA	NA	NA	NA	2.02955	5.64955e-21	NA	NA	1	12-oxophytodienoate reductase, putative, expressed
LOC_Os06g11300	NA	NA	NA	NA	NA	NA	2.46377	8.19082e-05	NA	NA	1	CRR4, putative, expressed
LOC_Os06g11310	NA	NA	NA	NA	NA	NA	NA	NA	-2.06896	4.06884e-11	3	plastocyanin-like domain containing protein, putative, expressed
LOC_Os06g11520	NA	NA	NA	NA	NA	NA	2.06046	8.01869e-09	2.74963	5.2238e-15	1	LMBR1 integral membrane protein, putative, expressed
LOC_Os06g11760	NA	NA	NA	NA	NA	NA	NA	NA	-2.07298	1.89272e-07	3	expressed protein
LOC_Os06g11980	NA	NA	NA	NA	NA	NA	NA	NA	-3.76828	2.74877e-58	3	DUF581 domain containing protein, expressed
LOC_Os06g12150	2.45555	3.78192e-33	NA	NA	NA	NA	NA	NA	NA	NA	1	shikimate kinase, putative, expressed
LOC_Os06g12370	NA	NA	NA	NA	-2.05965	0.000512459	-5.17092	1.00602e-17	-6.3028	6.89157e-22	3	OsFtsH6 FtsH protease, homologue of AtFtsH6, expressed
LOC_Os06g12410	NA	NA	NA	NA	NA	NA	NA	NA	2.08929	0.000799295	1	GDSL-like lipase/acylhydrolase, putative, expressed
LOC_Os06g13140	3.54294	0.00643537	NA	NA	NA	NA	NA	NA	NA	NA	1	WD domain, G-beta repeat domain containing protein, expressed
LOC_Os06g13180	3.9771	2.03899e-30	2.33842	3.76328e-08	NA	NA	NA	NA	NA	NA	1	metalloendoproteinase 1 precursor, putative, expressed
LOC_Os06g13320	NA	NA	NA	NA	-2.0496	0.0225424	-4.5953	1.76401e-07	-4.10635	7.34019e-07	3	protein kinase, putative, expressed
LOC_Os06g13390	NA	NA	2.65407	0.00435747	4.8974	2.67304e-10	5.38732	1.25453e-12	7.78208	6.3094e-22	1	SAM dependent carboxyl methyltransferase, putative, expressed
LOC_Os06g13870	3.79984	4.817e-28	3.06295	1.13214e-16	NA	NA	NA	NA	NA	NA	1	U-box protein CMPG1, putative, expressed
LOC_Os06g13880	NA	NA	NA	NA	2.6334	0.03076	NA	NA	NA	NA	1	expressed protein
LOC_Os06g13940	6.35712	4.20336e-15	6.71529	9.43645e-18	6.29402	1.03906e-15	6.84816	2.88284e-20	5.44455	4.99735e-10	2	expressed protein
LOC_Os06g14240	NA	NA	NA	NA	NA	NA	-2.53745	9.69102e-25	NA	NA	3	hsp20/alpha crystallin family protein, putative, expressed
LOC_Os06g14260	NA	NA	NA	NA	NA	NA	2.49713	7.02404e-05	NA	NA	1	lectin-like receptor kinase, putative, expressed
LOC_Os06g15400	NA	NA	NA	NA	NA	NA	NA	NA	-2.01455	4.50169e-09	3	expressed protein
LOC_Os06g16150	NA	NA	NA	NA	-2.26168	0.0112864	NA	NA	NA	NA	3	expressed protein
LOC_Os06g16170	NA	NA	NA	NA	2.70776	2.53763e-08	4.07624	6.62408e-24	NA	NA	1	expressed protein
LOC_Os06g16350	NA	NA	NA	NA	NA	NA	NA	NA	2.88313	7.72717e-06	1	peroxidase precursor, putative, expressed
LOC_Os06g17020	NA	NA	4.46843	3.98999e-05	5.41642	5.70469e-09	5.40859	1.536e-09	4.08914	0.000108921	2	anthocyanin 3-O-beta-glucosyltransferase, putative, expressed
LOC_Os06g17070	NA	NA	2.54629	0.00054662	2.24762	0.00378438	3.19971	6.88427e-09	2.6717	1.13577e-05	1	retrotransposon protein, putative, Ty1-copia subclass, expressed
LOC_Os06g17290	NA	NA	NA	NA	NA	NA	NA	NA	2.01785	3.45577e-45	1	phosphatidylinositol 3- and 4-kinase family protein, putative, expressed
LOC_Os06g18140	NA	NA	2.09832	1.23788e-06	NA	NA	NA	NA	NA	NA	1	UDP-glucoronosyl and UDP-glucosyl transferase domain containing protein, expressed
LOC_Os06g18670	NA	NA	NA	NA	-3.23257	0.00212349	-4.78287	1.72927e-06	NA	NA	3	anthocyanidin 3-O-glucosyltransferase, putative, expressed
LOC_Os06g18960	NA	NA	NA	NA	NA	NA	NA	NA	3.10746	0.00250162	1	embryogenesis transmembrane protein, putative, expressed
LOC_Os06g19070	NA	NA	NA	NA	2.74624	2.98561e-26	3.08756	2.82051e-33	NA	NA	1	cytochrome P450, putative, expressed
LOC_Os06g19444	NA	NA	NA	NA	NA	NA	2.67821	1.52851e-30	5.67071	1.99569e-128	1	CCT/B-box zinc finger protein, putative, expressed
LOC_Os06g19540	NA	NA	NA	NA	NA	NA	NA	NA	-3.49989	3.21391e-05	3	oxidoreductase, short chain dehydrogenase/reductase family domain containing protein, expressed
LOC_Os06g20150	NA	NA	NA	NA	NA	NA	2.58403	1.53805e-05	2.8349	2.46314e-06	1	peroxidase precursor, putative, expressed
LOC_Os06g20790	NA	NA	NA	NA	NA	NA	3.40611	1.83584e-07	3.53897	7.38434e-08	1	SAM dependent carboxyl methyltransferase, putative, expressed
LOC_Os06g20820	2.43824	9.95222e-12	2.38249	4.95245e-11	NA	NA	NA	NA	NA	NA	1	expressed protein
LOC_Os06g20900	NA	NA	NA	NA	NA	NA	NA	NA	6.21007	0.000146556	1	expressed protein
LOC_Os06g21230	NA	NA	NA	NA	NA	NA	NA	NA	-2.16972	0.000210033	3	glycine rich protein family protein, putative, expressed
LOC_Os06g21590	NA	NA	NA	NA	NA	NA	NA	NA	-9.20638	2.06716e-142	3	chlorophyll A-B binding protein, putative, expressed
LOC_Os06g22060	NA	NA	NA	NA	NA	NA	-2.59819	6.12205e-19	NA	NA	3	pyrophosphate--fructose 6-phosphate 1-phosphotransferase subunit alpha, putative, expressed
LOC_Os06g22100	NA	NA	NA	NA	NA	NA	2.80598	0.00118917	3.54763	7.67498e-07	1	DNA binding protein, putative, expressed
LOC_Os06g22290	NA	NA	NA	NA	NA	NA	NA	NA	5.68292	0.000777308	1	legume lectins beta domain containing protein, expressed
LOC_Os06g22440	NA	NA	NA	NA	NA	NA	2.66345	1.61336e-29	NA	NA	1	SAM dependent carboxyl methyltransferase, putative, expressed
LOC_Os06g22919	NA	NA	NA	NA	NA	NA	NA	NA	3.00659	2.84376e-05	1	DEFL9 - Defensin and Defensin-like DEFL family, expressed
LOC_Os06g23140	NA	NA	NA	NA	NA	NA	2.33893	0.00166654	3.84834	1.42296e-11	1	copper methylamine oxidase precursor, putative, expressed
LOC_Os06g23750	NA	NA	NA	NA	NA	NA	4.37558	4.62488e-07	NA	NA	1	expressed protein
LOC_Os06g23760	NA	NA	NA	NA	NA	NA	5.84654	4.3212e-12	4.69598	1.20636e-06	1	acyl-CoA oxidase, putative, expressed
LOC_Os06g23780	NA	NA	NA	NA	5.10865	0.014287	6.59456	4.62634e-06	6.29042	5.47178e-05	1	glutaryl-CoA dehydrogenase, mitochondrial precursor, putative, expressed
LOC_Os06g28030	NA	NA	NA	NA	NA	NA	7.72597	1.46106e-10	NA	NA	1	expressed protein
LOC_Os06g28050	NA	NA	NA	NA	5.51056	2.24087e-92	8.95914	3.49019e-251	6.71742	2.73882e-145	2	expressed protein
LOC_Os06g28194	NA	NA	NA	NA	NA	NA	3.09609	2.91925e-73	NA	NA	1	expressed protein
LOC_Os06g28820	NA	NA	NA	NA	NA	NA	-2.49591	8.84746e-05	-3.07153	8.10908e-06	3	cycloartenol synthase, putative, expressed
LOC_Os06g29220	NA	NA	NA	NA	5.27834	0.0151863	NA	NA	NA	NA	1	erythronate-4-phosphate dehydrogenase domain containing protein, expressed
LOC_Os06g29260	NA	NA	NA	NA	NA	NA	NA	NA	3.18041	0.000876122	1	retrotransposon protein, putative, unclassified, expressed
LOC_Os06g31090	2.48417	0.023052	NA	NA	NA	NA	NA	NA	NA	NA	1	GAMYB-binding protein, putative, expressed
LOC_Os06g32510	NA	NA	NA	NA	NA	NA	NA	NA	-2.05227	0.000289627	3	expressed protein
LOC_Os06g32980	2.49104	0.0173934	3.34502	7.80452e-06	2.27131	0.0188631	NA	NA	NA	NA	1	peroxidase precursor, putative, expressed
LOC_Os06g32990	NA	NA	2.81543	6.4051e-08	2.40131	5.96124e-06	2.67318	4.53108e-08	3.0705	1.59392e-10	1	peroxidase precursor, putative, expressed
LOC_Os06g33080	NA	NA	3.05526	0.0178415	3.02051	0.00364426	3.0064	0.00338195	3.18178	0.000675966	1	peroxidase precursor, putative, expressed
LOC_Os06g33090	NA	NA	3.21428	5.91593e-08	2.63601	2.15576e-05	2.73317	3.71078e-06	2.59905	1.75241e-05	1	peroxidase precursor, putative, expressed
LOC_Os06g33100	NA	NA	3.23262	9.33115e-08	2.72545	1.54633e-05	2.17391	0.00199773	2.89423	7.47117e-07	1	peroxidase precursor, putative, expressed
LOC_Os06g33880	NA	NA	4.91467	2.55222e-11	6.33425	2.15157e-24	6.54977	1.83543e-27	4.43971	2.99365e-09	2	expressed protein
LOC_Os06g33970	3.74326	2.8164e-21	3.83928	5.29932e-22	3.18382	1.28485e-15	3.41394	1.54635e-18	NA	NA	1	VQ domain containing protein, putative, expressed
LOC_Os06g34400	NA	NA	NA	NA	NA	NA	6.92733	6.17359e-07	NA	NA	2	zinc finger, C3HC4 type domain containing protein, expressed
LOC_Os06g34960	NA	NA	NA	NA	NA	NA	NA	NA	2.59856	0.000360622	1	TKL_IRAK_DUF26.1 - DUF26 kinases have homology to DUF26 containing loci, expressed
LOC_Os06g35520	NA	NA	3.65565	6.93679e-49	2.16927	6.31968e-19	NA	NA	NA	NA	1	peroxidase precursor, putative, expressed
LOC_Os06g35650	5.93193	1.30962e-15	5.26223	1.81923e-11	4.5254	1.46241e-07	5.11676	1.76976e-11	2.84033	0.0155721	2	reticuline oxidase-like protein precursor, putative, expressed
LOC_Os06g35700	NA	NA	2.97149	4.15157e-08	5.10876	2.15082e-26	6.27018	1.07078e-39	5.66447	6.31817e-33	1	reticuline oxidase-like protein precursor, putative, expressed
LOC_Os06g36040	NA	NA	NA	NA	NA	NA	NA	NA	-7.63965	2.60348e-10	3	expressed protein
LOC_Os06g36070	NA	NA	NA	NA	NA	NA	-2.66071	3.10976e-13	NA	NA	3	expressed protein
LOC_Os06g36380	NA	NA	NA	NA	NA	NA	5.70797	0.00145947	7.80246	9.10405e-09	1	expressed protein
LOC_Os06g37224	NA	NA	NA	NA	3.00959	5.15571e-08	6.20537	1.47351e-31	7.26417	1.30035e-40	1	cytochrome P450, putative, expressed
LOC_Os06g37300	NA	NA	NA	NA	3.16786	2.7391e-17	4.04836	6.45085e-27	2.08674	2.19132e-08	1	cytochrome P450, putative, expressed
LOC_Os06g37410	NA	NA	NA	NA	5.6442	0.00372952	6.61505	7.50104e-05	NA	NA	1	helix-loop-helix DNA-binding domain containing protein, expressed
LOC_Os06g38660	NA	NA	2.74238	1.29397e-26	3.43066	1.92786e-40	3.43513	2.6069e-41	2.49263	3.45732e-23	1	expressed protein
LOC_Os06g38670	NA	NA	2.24868	9.25871e-18	NA	NA	NA	NA	NA	NA	1	receptor-like protein kinase precursor, putative, expressed
LOC_Os06g38730	NA	NA	3.72536	1.84114e-14	5.42984	8.61066e-43	4.19523	4.44703e-23	2.84358	2.60825e-08	1	receptor-like protein kinase precursor, putative, expressed
LOC_Os06g38750	NA	NA	NA	NA	3.39343	0.0438093	4.1955	0.000696975	4.87845	0.000116795	1	proline-rich family protein, putative, expressed
LOC_Os06g38764	NA	NA	2.11182	7.13995e-06	2.32833	2.44519e-07	2.31072	1.39769e-07	NA	NA	1	expressed protein
LOC_Os06g38780	NA	NA	2.7676	1.88544e-07	NA	NA	NA	NA	NA	NA	1	receptor-like protein kinase 2 precursor, putative, expressed
LOC_Os06g39130	NA	NA	NA	NA	NA	NA	NA	NA	5.92864	0.000218241	1	hypothetical protein
LOC_Os06g39260	NA	NA	NA	NA	2.29995	6.00406e-20	NA	NA	NA	NA	1	solute carrier family 35 member B1, putative, expressed
LOC_Os06g39330	NA	NA	NA	NA	NA	NA	-2.68319	4.45608e-17	NA	NA	3	UDP-glucoronosyl and UDP-glucosyl transferase domain containing protein, expressed
LOC_Os06g39390	NA	NA	2.96035	0.036312	NA	NA	NA	NA	NA	NA	1	transferase family protein, putative, expressed
LOC_Os06g39690	NA	NA	NA	NA	NA	NA	-2.13156	1.62619e-26	-2.24145	4.90104e-29	3	SOUL heme-binding protein, putative, expressed
LOC_Os06g39750	NA	NA	2.5021	5.11236e-28	2.15879	2.08883e-21	2.02592	1.57348e-19	NA	NA	1	3-ketoacyl-CoA synthase, putative, expressed
LOC_Os06g39780	NA	NA	NA	NA	NA	NA	2.40025	3.91854e-07	4.02677	1.35883e-17	1	cytochrome P450, putative, expressed
LOC_Os06g40170	2.58687	4.90847e-06	4.25569	5.95122e-17	2.11181	0.000235411	NA	NA	NA	NA	1	phospholipase D, putative, expressed
LOC_Os06g40180	NA	NA	NA	NA	NA	NA	-2.18243	0.000398212	NA	NA	3	phospholipase D, putative, expressed
LOC_Os06g40750	NA	NA	NA	NA	NA	NA	NA	NA	-2.10048	2.56341e-13	3	expressed protein
LOC_Os06g40780	NA	NA	-2.68259	0.00233924	NA	NA	NA	NA	NA	NA	3	MONOCULM 1, putative, expressed
LOC_Os06g41670	NA	NA	NA	NA	NA	NA	NA	NA	2.23237	0.000485852	1	CC-NBS-LRR protein, putative, expressed
LOC_Os06g42470	NA	NA	NA	NA	NA	NA	2.20046	0.000782642	NA	NA	1	expressed protein
LOC_Os06g43080	NA	NA	4.4555	1.19224e-16	3.05178	1.09329e-06	2.85115	3.63855e-06	NA	NA	1	expressed protein
LOC_Os06g43350	NA	NA	NA	NA	-2.07096	0.00848646	-3.68364	1.68445e-07	-6.66446	7.91728e-17	3	cytochrome P450, putative, expressed
LOC_Os06g43370	NA	NA	NA	NA	NA	NA	NA	NA	2.42504	0.00184198	1	cytochrome P450, putative, expressed
LOC_Os06g43384	NA	NA	NA	NA	NA	NA	NA	NA	2.78305	0.0119468	1	cytochrome P450, putative, expressed
LOC_Os06g43780	2.88235	0.00154338	3.34532	2.45817e-05	3.01985	0.000184285	3.47977	8.62244e-07	3.91263	1.44617e-08	1	expressed protein
LOC_Os06g44010	4.66933	4.69029e-48	2.89047	3.40608e-19	2.50371	9.62469e-15	2.85806	8.81033e-20	NA	NA	1	WRKY28, expressed
LOC_Os06g44190	NA	NA	NA	NA	-2.90421	1.50353e-05	-2.27741	9.97904e-05	NA	NA	3	expressed protein
LOC_Os06g44250	3.86201	6.01754e-16	2.03915	0.00207831	2.19022	0.000127583	NA	NA	NA	NA	1	haemolysin-III, putative, expressed
LOC_Os06g44450	NA	NA	NA	NA	NA	NA	-2.21627	1.97339e-25	-3.32396	2.91138e-52	3	CCT/B-box zinc finger protein, putative, expressed
LOC_Os06g44900	NA	NA	NA	NA	-2.38317	0.0174885	NA	NA	NA	NA	3	leaf senescence related protein, putative, expressed
LOC_Os06g45184	NA	NA	2.30908	4.51601e-05	NA	NA	NA	NA	NA	NA	1	retrotransposon protein, putative, Ty3-gypsy subclass, expressed
LOC_Os06g45570	2.66188	1.94621e-15	2.22669	8.4376e-11	2.02069	4.05434e-09	NA	NA	NA	NA	1	VQ domain containing protein, putative, expressed
LOC_Os06g45630	2.09045	3.18314e-07	NA	NA	NA	NA	NA	NA	NA	NA	1	expressed protein
LOC_Os06g45960	NA	NA	NA	NA	2.17905	0.0337346	2.9067	0.000529839	NA	NA	1	cytochrome P450, putative, expressed
LOC_Os06g46030	NA	NA	NA	NA	NA	NA	NA	NA	3.02049	0.0151785	1	DUF640 domain containing protein, putative, expressed
LOC_Os06g46340	NA	NA	NA	NA	NA	NA	2.06781	0.00427361	2.21629	0.00189045	1	glycosyl hydrolase, family 31, putative, expressed
LOC_Os06g46460	NA	NA	NA	NA	-2.12714	0.00306392	-2.70823	4.66304e-05	-2.40296	0.000307117	3	expressed protein
LOC_Os06g46900	NA	NA	NA	NA	NA	NA	-3.17502	1.49804e-69	NA	NA	3	phosphosulfolactate synthase-related protein, putative, expressed
LOC_Os06g46920	NA	NA	NA	NA	NA	NA	-2.5168	2.49179e-06	-3.5015	8.44127e-11	3	dihydroflavonol-4-reductase, putative, expressed
LOC_Os06g46950	3.61654	2.94033e-37	2.70056	4.94895e-20	2.07112	7.23726e-12	2.18994	5.15424e-14	NA	NA	1	EF hand family protein, putative, expressed
LOC_Os06g47360	NA	NA	NA	NA	NA	NA	NA	NA	2.3091	0.000501172	1	beta-expansin precursor, putative, expressed
LOC_Os06g47800	NA	NA	NA	NA	NA	NA	2.6951	5.17057e-15	NA	NA	1	disease resistance protein RGA3, putative, expressed
LOC_Os06g48010	NA	NA	NA	NA	NA	NA	NA	NA	2.77941	0.00371358	1	peroxidase precursor, putative, expressed
LOC_Os06g48160	5.46975	0.0142701	NA	NA	NA	NA	NA	NA	NA	NA	1	glycosyl hydrolases family 16, putative, expressed
LOC_Os06g48200	NA	NA	NA	NA	NA	NA	NA	NA	-3.51222	8.41802e-10	3	glycosyl hydrolases family 16, putative, expressed
LOC_Os06g48560	NA	NA	NA	NA	NA	NA	NA	NA	-4.38426	7.92983e-08	3	transferase family protein, putative, expressed
LOC_Os06g48800	NA	NA	NA	NA	NA	NA	-2.23245	3.20766e-20	NA	NA	3	OsHKT2;4 - Na+ transporter, expressed
LOC_Os06g49120	NA	NA	NA	NA	NA	NA	-3.24316	2.94479e-60	NA	NA	3	Complex I intermediate-associated protein 30 domain containing protein, putative, expressed
LOC_Os06g49210	NA	NA	NA	NA	NA	NA	NA	NA	-3.35643	2.51636e-12	3	retrotransposon protein, putative, unclassified, expressed
LOC_Os06g49660	NA	NA	NA	NA	NA	NA	NA	NA	-2.89035	3.70832e-11	3	transferase family protein, putative, expressed
LOC_Os06g50060	NA	NA	NA	NA	NA	NA	NA	NA	2.01001	0.000110513	1	ras-related protein, putative, expressed
LOC_Os06g50080	NA	NA	NA	NA	NA	NA	2.3904	6.05934e-21	3.63225	2.58372e-44	1	DUF581 domain containing protein, expressed
LOC_Os06g50230	NA	NA	NA	NA	NA	NA	NA	NA	-2.13293	2.65196e-09	3	expressed protein
LOC_Os06g50420	NA	NA	NA	NA	NA	NA	NA	NA	2.27908	0.0054837	1	plastocyanin-like domain containing protein, putative, expressed
LOC_Os06g50650	NA	NA	NA	NA	NA	NA	2.17188	5.13627e-07	2.06886	2.83372e-06	1	plastocyanin-like domain containing protein, putative, expressed
LOC_Os06g50900	NA	NA	NA	NA	NA	NA	-2.83344	1.24578e-07	-3.00982	1.70221e-07	3	expressed protein
LOC_Os06g50940	NA	NA	NA	NA	3.86073	0.00311006	4.11529	0.000590892	NA	NA	1	GDSL-like lipase/acylhydrolase, putative, expressed
LOC_Os06g50950	6.0532	0.00083822	7.60166	2.71198e-09	5.88627	0.000964921	6.74319	1.94232e-05	5.48239	0.00481018	2	GDSL-like lipase/acylhydrolase, putative, expressed
LOC_Os06g51050	NA	NA	2.82173	5.26199e-08	3.22982	1.16943e-10	3.91043	1.64336e-15	3.63869	1.30696e-13	1	CHIT7 - Chitinase family protein precursor, expressed
LOC_Os06g51260	NA	NA	NA	NA	NA	NA	-2.23925	3.76669e-33	-3.53622	2.15115e-74	3	MYB family transcription factor, putative, expressed
LOC_Os06g51290	NA	NA	NA	NA	NA	NA	-2.3505	4.25487e-12	NA	NA	3	phytoene synthase, chloroplast precursor, putative, expressed
LOC_Os07g01070	NA	NA	NA	NA	NA	NA	-2.56878	8.33668e-06	-2.08769	0.000530458	3	peptide transporter, putative, expressed
LOC_Os07g01750	NA	NA	NA	NA	NA	NA	2.49419	2.50029e-13	2.56389	4.71286e-14	1	MATE efflux family protein, putative, expressed
LOC_Os07g01810	NA	NA	NA	NA	-3.34287	0.00145481	NA	NA	NA	NA	3	potassium channel protein, putative, expressed
LOC_Os07g02120	NA	NA	NA	NA	NA	NA	NA	NA	-5.96992	0.010266	3	flavin-containing monooxygenase family protein, putative, expressed
LOC_Os07g02200	NA	NA	NA	NA	NA	NA	NA	NA	-2.13137	0.000130288	3	plastocyanin-like domain containing protein, putative, expressed
LOC_Os07g02570	NA	NA	2.27034	5.75593e-08	2.797	2.44049e-13	3.37713	9.21487e-21	3.24728	4.6217e-19	1	NB-ARC domain containing protein, expressed
LOC_Os07g02610	NA	NA	NA	NA	NA	NA	NA	NA	2.82472	0.00215806	1	expressed protein
LOC_Os07g02690	NA	NA	NA	NA	6.39103	6.72221e-05	7.26688	7.68766e-07	6.79756	2.84376e-05	2	DUF538 domain containing protein, putative, expressed
LOC_Os07g02850	3.3597	8.65022e-05	2.89785	0.00374317	NA	NA	NA	NA	NA	NA	1	DUF538 domain containing protein, putative, expressed
LOC_Os07g02880	NA	NA	4.30369	0.000431043	4.14774	0.000516149	4.14503	0.000240455	NA	NA	1	DUF538 domain containing protein, putative, expressed
LOC_Os07g02990	2.03882	0.00192364	3.15055	6.01976e-09	2.89662	5.0808e-08	3.73116	2.03442e-14	2.48826	2.30254e-06	1	expressed protein
LOC_Os07g03020	NA	NA	NA	NA	NA	NA	3.30363	0.0021662	NA	NA	1	expressed protein
LOC_Os07g03120	NA	NA	NA	NA	NA	NA	-2.1253	2.0375e-07	NA	NA	3	expressed protein
LOC_Os07g03170	2.73437	2.72269e-05	3.2104	1.28072e-07	2.92458	1.3131e-06	3.2105	1.24161e-08	NA	NA	1	expressed protein
LOC_Os07g03580	NA	NA	NA	NA	5.46968	5.61457e-05	7.06627	1.1147e-08	6.15302	2.45073e-06	1	SCP-like extracellular protein, expressed
LOC_Os07g03590	NA	NA	NA	NA	6.22325	0.000432428	7.61706	6.53814e-07	7.2582	8.81731e-06	2	SCP-like extracellular protein, expressed
LOC_Os07g03600	NA	NA	NA	NA	4.21308	0.0173536	NA	NA	5.42696	0.000368519	1	SCP-like extracellular protein, expressed
LOC_Os07g03780	NA	NA	2.87375	0.018674	4.0156	8.59455e-06	4.74302	2.27202e-09	3.54469	9.07904e-05	1	lectin-like receptor kinase, putative, expressed
LOC_Os07g03790	NA	NA	2.84952	5.6202e-05	3.36027	1.26826e-07	4.05491	1.18532e-11	3.77854	5.62319e-10	1	lectin-like receptor kinase 7, putative, expressed
LOC_Os07g03810	NA	NA	NA	NA	NA	NA	3.09537	2.63761e-27	NA	NA	1	lectin-like receptor kinase 7, putative, expressed
LOC_Os07g03820	NA	NA	NA	NA	2.09885	4.15023e-08	2.78045	3.90881e-16	NA	NA	1	lectin-like receptor kinase, putative, expressed
LOC_Os07g03880	NA	NA	NA	NA	NA	NA	-3.0326	6.07011e-14	-3.22566	2.58775e-15	3	lectin-like receptor kinase, putative, expressed
LOC_Os07g03890	NA	NA	NA	NA	NA	NA	-2.6641	4.64166e-05	-2.07526	0.00185207	3	lectin-like receptor kinase 7, putative, expressed
LOC_Os07g03900	NA	NA	NA	NA	-2.21634	0.0431749	NA	NA	NA	NA	3	lectin-like receptor kinase, putative, expressed
LOC_Os07g03920	NA	NA	NA	NA	NA	NA	NA	NA	-2.91783	0.0137269	3	lectin-like receptor kinase 7, putative, expressed
LOC_Os07g04560	2.74436	0.000120251	2.75379	0.000127645	3.3628	1.55098e-07	3.89388	7.75333e-11	2.86061	9.29845e-06	1	no apical meristem protein, putative, expressed
LOC_Os07g04820	5.60689	2.34689e-19	3.21802	0.00648083	NA	NA	NA	NA	NA	NA	1	protein kinase, putative, expressed
LOC_Os07g04840	NA	NA	NA	NA	NA	NA	NA	NA	-3.13932	1.77214e-53	3	PsbP, putative, expressed
LOC_Os07g04930	NA	NA	NA	NA	NA	NA	NA	NA	-3.58131	4.50148e-06	3	retrotransposon protein, putative, unclassified, expressed
LOC_Os07g04990	NA	NA	NA	NA	NA	NA	-2.15419	1.72718e-07	-4.15106	1.49014e-22	3	oxidoreductase, aldo/keto reductase family protein, putative, expressed
LOC_Os07g05020	NA	NA	NA	NA	NA	NA	-3.28204	0.00364537	NA	NA	3	expressed protein
LOC_Os07g05040	NA	NA	NA	NA	NA	NA	NA	NA	3.56481	7.47657e-36	1	cadmium-induced protein, putative, expressed
LOC_Os07g05380	NA	NA	NA	NA	-2.35984	0.00663513	NA	NA	NA	NA	3	ATPase BadF/BadG/BcrA/BcrD type, putative, expressed
LOC_Os07g05480	NA	NA	NA	NA	NA	NA	-2.95293	4.76711e-17	-6.94262	5.34161e-64	3	photosystem I reaction center subunit, chloroplast precursor, putative, expressed
LOC_Os07g05830	7.1427	2.07094e-09	NA	NA	NA	NA	NA	NA	NA	NA	1	zinc-finger protein, putative, expressed
LOC_Os07g06660	NA	NA	NA	NA	NA	NA	-2.91259	8.70982e-89	-2.90551	1.22002e-88	3	glyoxalase family protein, putative, expressed
LOC_Os07g06700	NA	NA	NA	NA	-2.82635	0.00115668	-4.87898	7.39708e-06	-4.8989	8.95741e-07	3	expressed protein
LOC_Os07g06790	NA	NA	NA	NA	NA	NA	NA	NA	2.09953	1.0764e-05	1	VQ domain containing protein, putative, expressed
LOC_Os07g06800	NA	NA	NA	NA	-3.35617	2.11405e-10	-3.34236	3.30711e-11	NA	NA	3	3-oxo-5-alpha-steroid 4-dehydrogenase, putative, expressed
LOC_Os07g06830	NA	NA	NA	NA	2.00341	0.000109176	NA	NA	NA	NA	1	gibberellin receptor GID1L2, putative, expressed
LOC_Os07g07320	NA	NA	NA	NA	2.15852	1.04549e-11	2.87198	4.75196e-21	NA	NA	1	glutathione S-transferase, putative, expressed
LOC_Os07g07540	NA	NA	NA	NA	NA	NA	-2.85421	5.18133e-56	NA	NA	3	SHOOT1 protein, putative, expressed
LOC_Os07g07790	NA	NA	NA	NA	2.95596	0.0375857	NA	NA	3.277	0.0141691	1	LTPL75 - Protease inhibitor/seed storage/LTP family protein precursor, expressed
LOC_Os07g07860	NA	NA	NA	NA	NA	NA	NA	NA	2.86589	0.000763035	1	LTPL76 - Protease inhibitor/seed storage/LTP family protein precursor, expressed
LOC_Os07g07920	NA	NA	NA	NA	NA	NA	NA	NA	2.1475	0.00036177	1	LTPL100 - Protease inhibitor/seed storage/LTP family protein precursor, expressed
LOC_Os07g07930	NA	NA	NA	NA	2.21604	4.95946e-06	2.63983	1.18689e-08	2.53623	6.14822e-08	1	LTPL78 - Protease inhibitor/seed storage/LTP family protein precursor, expressed
LOC_Os07g08150	NA	NA	NA	NA	-3.65462	1.38954e-10	-6.86056	1.69274e-23	NA	NA	3	early light-induced protein, chloroplast precursor, putative, expressed
LOC_Os07g08160	NA	NA	NA	NA	-3.62678	1.76719e-08	-6.91818	2.80506e-20	NA	NA	3	early light-induced protein, chloroplast precursor, putative, expressed
LOC_Os07g08350	NA	NA	NA	NA	NA	NA	NA	NA	2.37819	0.000821262	1	C4-dicarboxylate transporter/malic acid transport protein, expressed
LOC_Os07g08430	NA	NA	2.05363	9.96664e-32	2.31508	3.2964e-40	2.13262	3.81437e-35	NA	NA	1	indole-3-glycerol phosphate lyase, chloroplast precursor, putative, expressed
LOC_Os07g09190	NA	NA	NA	NA	2.19902	2.54973e-06	3.42596	2.43655e-14	3.05484	1.20456e-11	1	transketolase, putative, expressed
LOC_Os07g09420	NA	NA	2.77541	1.246e-29	2.14554	1.95812e-18	2.08994	4.1204e-18	NA	NA	1	ATPase, putative, expressed
LOC_Os07g10495	NA	NA	NA	NA	NA	NA	-2.08851	0.000176818	NA	NA	3	expressed protein
LOC_Os07g10910	NA	NA	NA	NA	-2.03989	0.000127432	-2.31531	5.54601e-06	NA	NA	3	ATEXO70F1, putative, expressed
LOC_Os07g11110	NA	NA	NA	NA	-2.25843	9.902e-08	-2.84228	4.29497e-12	NA	NA	3	NAD dependent epimerase/dehydratase family protein, putative, expressed
LOC_Os07g11790	NA	NA	NA	NA	7.33461	0.00384224	10.4331	2.25908e-06	7.4946	0.00214648	2	terpene synthase, putative, expressed
LOC_Os07g11870	NA	NA	NA	NA	5.67184	3.83896e-05	7.65051	8.28967e-09	4.21046	0.00319199	1	cytochrome P450, putative, expressed
LOC_Os07g13780	NA	NA	NA	NA	NA	NA	NA	NA	3.21969	1.36624e-05	1	cytokinin-O-glucosyltransferase 2, putative, expressed
LOC_Os07g13800	NA	NA	NA	NA	NA	NA	NA	NA	2.0558	2.31587e-08	1	cytokinin-N-glucosyltransferase, putative, expressed
LOC_Os07g14080	NA	NA	NA	NA	NA	NA	7.06484	1.00169e-08	6.33094	4.13691e-05	1	transferase family protein, putative, expressed
LOC_Os07g14820	NA	NA	NA	NA	NA	NA	NA	NA	5.75913	0.00409044	1	expressed protein
LOC_Os07g15370	NA	NA	NA	NA	NA	NA	NA	NA	2.30341	0.000450184	1	metal transporter Nramp6, putative, expressed
LOC_Os07g15460	NA	NA	NA	NA	NA	NA	NA	NA	-2.73572	1.89272e-07	3	metal transporter Nramp6, putative, expressed
LOC_Os07g17010	NA	NA	NA	NA	NA	NA	NA	NA	8.34426	2.75588e-10	1	chalcone synthase, putative, expressed
LOC_Os07g17210	NA	NA	NA	NA	NA	NA	-2.43732	0.00230997	NA	NA	3	FAS1, putative, expressed
LOC_Os07g17970	NA	NA	NA	NA	-2.13334	0.0111066	-3.98637	1.90316e-07	-4.97016	7.44963e-10	3	AMP-binding domain containing protein, expressed
LOC_Os07g19130	NA	NA	NA	NA	NA	NA	NA	NA	-3.4668	1.11259e-09	3	cytochrome P450, putative, expressed
LOC_Os07g22730	2.68041	0.00931401	3.30049	8.54563e-05	2.50209	0.0107946	NA	NA	NA	NA	1	AP2 domain containing protein, expressed
LOC_Os07g22770	NA	NA	5.20572	0.0377768	5.73173	0.000980038	6.43782	8.56289e-05	NA	NA	2	AP2 domain containing protein, expressed
LOC_Os07g22930	NA	NA	NA	NA	NA	NA	-2.34748	4.21381e-20	-2.13885	7.99236e-17	3	starch synthase, putative, expressed
LOC_Os07g23120	NA	NA	NA	NA	-2.29659	2.29963e-07	-4.1939	7.3303e-21	-4.94125	3.82449e-26	3	expressed protein
LOC_Os07g23150	NA	NA	NA	NA	-2.24169	0.000101181	-3.95782	1.72952e-11	-3.48957	5.06765e-10	3	transferase family protein, putative, expressed
LOC_Os07g23410	NA	NA	NA	NA	NA	NA	6.96824	1.00381e-34	8.67356	1.1561e-56	1	fatty acid desaturase, putative, expressed
LOC_Os07g23430	NA	NA	NA	NA	NA	NA	5.73565	4.54171e-16	6.96006	3.35974e-22	1	fatty acid desaturase, putative, expressed
LOC_Os07g23570	NA	NA	NA	NA	3.25948	0.00363195	3.67816	0.000325343	3.64339	0.000396622	1	cytochrome P450 72A1, putative, expressed
LOC_Os07g25430	NA	NA	NA	NA	NA	NA	NA	NA	-3.8873	1.9023e-52	3	photosystem I reaction center subunit IV A, chloroplast precursor, putative, expressed
LOC_Os07g25540	NA	NA	NA	NA	NA	NA	-3.30475	5.57407e-07	NA	NA	3	flavin monooxygenase, putative, expressed
LOC_Os07g25900	NA	NA	3.29485	0.047848	NA	NA	NA	NA	NA	NA	1	expressed protein
LOC_Os07g26110	NA	NA	NA	NA	2.0575	0.000169992	3.23011	6.25461e-11	3.14166	2.6226e-10	1	membrane associated DUF588 domain containing protein, putative, expressed
LOC_Os07g26660	NA	NA	NA	NA	NA	NA	-2.55319	0.00426386	-2.41115	0.00508581	3	aquaporin protein, putative, expressed
LOC_Os07g26870	NA	NA	NA	NA	3.3412	0.0148148	5.64253	8.68037e-08	6.44309	8.93043e-10	1	cytochrome P450, putative, expressed
LOC_Os07g27970	NA	NA	NA	NA	NA	NA	-2.18353	7.10259e-13	NA	NA	3	O-methyltransferase, putative, expressed
LOC_Os07g28040	NA	NA	NA	NA	-2.13526	9.81526e-17	-4.08671	1.15787e-51	NA	NA	3	O-methyltransferase, putative, expressed
LOC_Os07g28400	NA	NA	NA	NA	NA	NA	NA	NA	2.60937	1.03392e-05	1	CDGSH iron sulfur domain-containing protein 1, putative, expressed
LOC_Os07g28810	NA	NA	NA	NA	NA	NA	5.77083	0.000228601	NA	NA	1	expressed protein
LOC_Os07g28890	2.0213	0.0175834	NA	NA	NA	NA	NA	NA	NA	NA	1	ethylene-responsive protein related, putative, expressed
LOC_Os07g29410	NA	NA	NA	NA	NA	NA	NA	NA	-2.2173	1.44648e-25	1	thioredoxin, putative, expressed
LOC_Os07g29750	NA	NA	NA	NA	NA	NA	NA	NA	3.27673	8.76635e-09	1	glycosyl hydrolases family 16, putative, expressed
LOC_Os07g29960	NA	NA	NA	NA	NA	NA	NA	NA	2.70462	0.000317799	1	cytochrome P450, putative, expressed
LOC_Os07g30590	NA	NA	NA	NA	NA	NA	3.43709	0.00186632	NA	NA	1	LTPL55 - Protease inhibitor/seed storage/LTP family protein precursor, putative, expressed
LOC_Os07g30670	NA	NA	NA	NA	NA	NA	6.27246	2.98888e-37	6.61311	3.54953e-40	1	2Fe-2S iron-sulfur cluster binding domain containing protein, expressed
LOC_Os07g31190	NA	NA	2.21316	0.000484934	2.61803	3.14521e-06	2.8256	1.10551e-07	3.20099	2.28133e-09	1	OsWAK71 - OsWAK receptor-like cytoplasmic kinase OsWAK-RLCK, expressed
LOC_Os07g31770	NA	NA	NA	NA	NA	NA	6.07383	0.00206394	NA	NA	1	chalcone synthase, putative, expressed
LOC_Os07g32680	NA	NA	NA	NA	NA	NA	NA	NA	-2.37883	0.00955793	3	retrotransposon protein, putative, unclassified, expressed
LOC_Os07g32710	NA	NA	NA	NA	NA	NA	NA	NA	-2.99146	3.10429e-09	3	retrotransposon protein, putative, unclassified, expressed
LOC_Os07g33440	NA	NA	NA	NA	3.71178	3.57207e-20	3.9476	1.36266e-23	NA	NA	1	cytochrome P450, putative, expressed
LOC_Os07g33780	NA	NA	NA	NA	NA	NA	2.14484	1.77968e-07	NA	NA	1	pleiotropic drug resistance protein 5, putative, expressed
LOC_Os07g34260	4.4311	1.10109e-06	5.35537	3.20699e-09	5.83855	1.04752e-10	4.69513	5.12611e-08	NA	NA	2	chalcone and stilbene synthases, putative, expressed
LOC_Os07g34280	3.72155	1.1544e-11	5.70643	6.86434e-25	6.71266	1.47387e-32	5.14991	5.76723e-22	NA	NA	2	CXE carboxylesterase, putative, expressed
LOC_Os07g34520	NA	NA	2.51837	0.0252593	NA	NA	NA	NA	NA	NA	1	isocitrate lyase, putative, expressed
LOC_Os07g34570	NA	NA	NA	NA	3.66415	4.00694e-18	5.90277	5.24811e-39	3.00578	3.20135e-13	1	FAD dependent oxidoreductase domain containing protein, expressed
LOC_Os07g34980	NA	NA	NA	NA	NA	NA	2.78792	4.73382e-13	NA	NA	1	TKL_IRAK_DUF26-lh.9 - DUF26 kinases have homology to DUF26 containing loci, expressed
LOC_Os07g35004	NA	NA	NA	NA	2.06234	1.44751e-08	2.83241	2.52013e-16	NA	NA	1	TKL_IRAK_DUF26-la.4 - DUF26 kinases have homology to DUF26 containing loci, expressed
LOC_Os07g35300	NA	NA	2.77734	3.41841e-09	NA	NA	2.18516	4.17331e-06	2.07431	2.3457e-05	1	TKL_IRAK_DUF26-lc.11 - DUF26 kinases have homology to DUF26 containing loci, expressed
LOC_Os07g35350	NA	NA	NA	NA	NA	NA	NA	NA	2.81161	8.6229e-14	1	glucan endo-1,3-beta-glucosidase precursor, putative, expressed
LOC_Os07g35480	NA	NA	NA	NA	2.01297	3.92005e-05	2.28616	9.09886e-07	2.50236	9.24694e-08	1	glucan endo-1,3-beta-glucosidase precursor, putative, expressed
LOC_Os07g35560	NA	NA	NA	NA	NA	NA	2.20867	0.000175141	2.38679	5.41278e-05	1	glucan endo-1,3-beta-glucosidase precursor, putative, expressed
LOC_Os07g35660	NA	NA	NA	NA	NA	NA	3.30971	8.85999e-13	3.87509	3.8665e-18	1	TKL_IRAK_DUF26-lc.21 - DUF26 kinases have homology to DUF26 containing loci, expressed
LOC_Os07g35740	NA	NA	4.10628	1.65026e-07	3.83831	8.69351e-07	3.7115	1.73907e-06	2.84805	0.00214129	1	TKL_IRAK_DUF26-ld.2 - DUF26 kinases have homology to DUF26 containing loci, expressed
LOC_Os07g35750	NA	NA	NA	NA	2.12319	0.00100282	2.53464	2.48332e-05	NA	NA	1	TKL_IRAK_DUF26-ld.3 - DUF26 kinases have homology to DUF26 containing loci, expressed
LOC_Os07g35770	NA	NA	5.66803	0.00431865	7.84841	1.29562e-10	8.16087	1.53326e-11	6.53201	3.63068e-05	2	TKL_IRAK_DUF26-ld.4 - DUF26 kinases have homology to DUF26 containing loci
LOC_Os07g35810	NA	NA	NA	NA	NA	NA	2.04696	5.81268e-08	2.10807	3.02854e-08	1	TKL_IRAK_DUF26-ld.6 - DUF26 kinases have homology to DUF26 containing loci, expressed
LOC_Os07g36080	NA	NA	NA	NA	NA	NA	NA	NA	-3.37447	7.37679e-59	3	oxygen evolving enhancer protein 3 domain containing protein, expressed
LOC_Os07g36190	NA	NA	NA	NA	NA	NA	-2.38846	1.97948e-85	NA	NA	3	hydrolase, NUDIX family, domain containing protein, expressed
LOC_Os07g36400	NA	NA	NA	NA	NA	NA	NA	NA	-4.66214	1.16252e-38	3	expressed protein
LOC_Os07g36544	NA	NA	2.08894	8.48152e-17	2.37119	6.15838e-22	2.55796	2.5385e-26	NA	NA	1	serine/threonine-protein kinase receptor precursor, putative, expressed
LOC_Os07g36560	3.68217	3.17932e-06	5.48401	8.98101e-15	4.98732	2.26938e-12	5.17025	4.06878e-14	3.60928	2.62295e-06	2	transferase family protein, putative, expressed
LOC_Os07g36570	3.1301	1.39936e-25	2.46495	5.85198e-16	NA	NA	NA	NA	NA	NA	1	KI domain interacting kinase 1, putative, expressed
LOC_Os07g36690	NA	NA	NA	NA	2.98597	0.0367982	4.62131	7.3709e-07	4.58352	1.23192e-06	1	CSLF2 - cellulose synthase-like family F; beta1,3;1,4 glucan synthase, expressed
LOC_Os07g36700	NA	NA	NA	NA	4.99138	0.0274133	6.03707	8.66036e-05	6.74819	3.43482e-06	1	CSLF1 - cellulose synthase-like family F; beta1,3;1,4 glucan synthase, expressed
LOC_Os07g37210	NA	NA	NA	NA	-2.17943	6.98208e-05	-2.61729	9.24665e-07	NA	NA	3	MYB family transcription factor, putative, expressed
LOC_Os07g37240	NA	NA	NA	NA	NA	NA	NA	NA	-9.67216	2.00223e-81	3	chlorophyll A-B binding protein, putative, expressed
LOC_Os07g37320	2.07718	1.97133e-35	NA	NA	NA	NA	NA	NA	-2.16146	2.63653e-34	1	transporter family protein, putative, expressed
LOC_Os07g37400	5.72444	2.04098e-13	NA	NA	4.0667	0.000472925	4.29045	1.27731e-05	3.65266	0.00140115	2	OsFBX257 - F-box domain containing protein, expressed
LOC_Os07g37420	NA	NA	NA	NA	-2.16774	2.62705e-17	-3.49865	7.06954e-40	-2.0546	1.47899e-16	3	versicolorin reductase, putative, expressed
LOC_Os07g37454	NA	NA	NA	NA	NA	NA	2.66979	1.70262e-06	NA	NA	1	urate anion exchanger, putative, expressed
LOC_Os07g37550	NA	NA	NA	NA	NA	NA	-2.28588	1.24397e-25	-9.06095	1.47081e-213	3	chlorophyll A-B binding protein, putative, expressed
LOC_Os07g37730	8.68899	1.34091e-49	6.84421	2.64622e-30	5.36714	8.68778e-18	5.52572	4.26459e-20	2.52352	0.00402304	2	NADH-ubiquinone oxidoreductase, mitochondrial precursor, putative, expressed
LOC_Os07g38130	NA	NA	NA	NA	NA	NA	NA	NA	3.56666	0.00100376	1	polygalacturonase inhibitor 1 precursor, putative, expressed
LOC_Os07g38250	NA	NA	NA	NA	NA	NA	2.50821	1.70506e-05	NA	NA	1	expressed protein
LOC_Os07g38430	NA	NA	NA	NA	NA	NA	2.75148	2.81312e-28	2.18156	5.54897e-18	1	WD domain, G-beta repeat domain containing protein, expressed
LOC_Os07g38440	NA	NA	NA	NA	2.4526	3.97318e-17	3.92454	7.93251e-43	NA	NA	1	uncharacterized 50.6 kDa protein in the 5region of gyrA and gyrB, putative, expressed
LOC_Os07g38570	2.99084	2.30495e-06	2.55344	0.000744184	2.01295	0.0109031	2.3569	0.00025928	NA	NA	1	expressed protein
LOC_Os07g38840	NA	NA	2.1879	1.83207e-10	NA	NA	NA	NA	NA	NA	1	expressed protein
LOC_Os07g38910	NA	NA	NA	NA	-2.1935	0.0120799	-2.67621	0.00044398	NA	NA	3	histidine kinase, putative, expressed
LOC_Os07g38960	NA	NA	NA	NA	NA	NA	NA	NA	-6.76003	2.2256e-137	3	chlorophyll A-B binding protein, putative, expressed
LOC_Os07g39270	NA	NA	NA	NA	NA	NA	2.65538	1.01214e-29	NA	NA	1	polyprenyl synthetase, putative, expressed
LOC_Os07g39720	2.29669	0.00987161	NA	NA	NA	NA	2.5919	0.000158454	2.6349	0.000217388	1	expressed protein
LOC_Os07g39860	3.83658	3.34036e-11	4.64238	1.83096e-18	4.19412	1.59337e-14	4.63428	2.44091e-19	NA	NA	2	expressed protein
LOC_Os07g40080	3.5034	0.00679023	5.91875	2.20323e-16	5.80702	1.70653e-15	5.90305	4.91743e-17	3.23631	0.00919235	2	ZOS7-09 - C2H2 zinc finger protein, expressed
LOC_Os07g40300	NA	NA	NA	NA	NA	NA	NA	NA	2.60654	3.58342e-06	1	ZOS7-10 - C2H2 zinc finger protein, expressed
LOC_Os07g40450	NA	NA	NA	NA	NA	NA	NA	NA	-2.50755	3.77995e-35	3	expressed protein
LOC_Os07g40630	2.13383	2.00246e-12	2.27564	5.43595e-14	NA	NA	2.20294	7.1815e-14	NA	NA	1	BRASSINOSTEROID INSENSITIVE 1 precursor, putative, expressed
LOC_Os07g41070	NA	NA	NA	NA	4.87383	0.0440812	5.36206	0.00375888	NA	NA	2	NAD dependent epimerase/dehydratase family protein, putative, expressed
LOC_Os07g41230	NA	NA	2.28387	4.97273e-15	2.49783	1.58788e-18	2.71159	1.80026e-22	NA	NA	1	esterase, putative, expressed
LOC_Os07g41340	NA	NA	NA	NA	NA	NA	NA	NA	5.15933	0.0112028	1	B12D protein, putative, expressed
LOC_Os07g41420	NA	NA	NA	NA	-2.21712	0.00602741	-2.30922	0.000553868	NA	NA	3	expressed protein
LOC_Os07g42250	NA	NA	NA	NA	NA	NA	-2.88752	9.23794e-52	NA	NA	3	strictosidine synthase, putative, expressed
LOC_Os07g42510	NA	NA	NA	NA	NA	NA	2.3433	2.27611e-10	NA	NA	1	AP2 domain containing protein, expressed
LOC_Os07g42650	NA	NA	NA	NA	NA	NA	4.37575	1.32411e-76	3.33766	5.17339e-45	1	expressed protein
LOC_Os07g42994	NA	NA	NA	NA	NA	NA	NA	NA	-2.71907	0.00035467	3	hydrolase, putative, expressed
LOC_Os07g43240	NA	NA	NA	NA	2.03438	6.95635e-05	NA	NA	NA	NA	1	SKP1-like protein 1B, putative, expressed
LOC_Os07g43530	NA	NA	NA	NA	NA	NA	2.14103	0.000488295	2.58769	5.78733e-06	1	helix-loop-helix DNA-binding domain containing protein, expressed
LOC_Os07g43560	NA	NA	NA	NA	NA	NA	NA	NA	-2.64263	4.96449e-06	1	TKL_IRAK_DUF26-lc.24 - DUF26 kinases have homology to DUF26 containing loci, expressed
LOC_Os07g43570	NA	NA	NA	NA	NA	NA	2.6144	1.21356e-06	-2.88644	4.59947e-07	1	TKL_IRAK_DUF26-lc.25 - DUF26 kinases have homology to DUF26 containing loci, expressed
LOC_Os07g43700	NA	NA	NA	NA	NA	NA	-2.57671	9.53198e-30	-4.36913	6.58839e-69	3	lactate/malate dehydrogenase, putative, expressed
LOC_Os07g43800	NA	NA	2.42557	7.1312e-12	2.2483	1.58919e-10	2.43423	8.55539e-13	NA	NA	1	EF hand family protein, putative, expressed
LOC_Os07g43810	NA	NA	NA	NA	NA	NA	2.68149	4.91229e-54	NA	NA	1	RNA recognition motif containing protein, putative, expressed
LOC_Os07g43820	NA	NA	NA	NA	NA	NA	-2.61734	1.43789e-05	-2.10063	0.000166831	3	glycosyl hydrolase, putative, expressed
LOC_Os07g43925	NA	NA	NA	NA	NA	NA	-2.69733	1.53044e-12	NA	NA	3	expressed protein
LOC_Os07g43970	5.84716	0.000651484	NA	NA	5.40164	0.00305344	NA	NA	NA	NA	2	calmodulin-binding protein, putative, expressed
LOC_Os07g44100	NA	NA	NA	NA	NA	NA	NA	NA	2.99921	0.00414148	1	expressed protein
LOC_Os07g44110	NA	NA	NA	NA	NA	NA	NA	NA	4.0311	3.14544e-06	1	cytochrome P450 72A1, putative, expressed
LOC_Os07g44140	2.97303	2.92965e-16	NA	NA	NA	NA	NA	NA	NA	NA	1	cytochrome P450 72A1, putative, expressed
LOC_Os07g44330	NA	NA	NA	NA	NA	NA	-3.09923	2.28607e-112	-2.9063	1.38414e-100	3	kinase, putative, expressed
LOC_Os07g44440	NA	NA	NA	NA	NA	NA	4.16498	0.00013861	5.74799	1.7878e-08	1	peroxiredoxin, putative, expressed
LOC_Os07g44780	NA	NA	NA	NA	NA	NA	-2.98002	0.000562507	NA	NA	3	GDSL-like lipase/acylhydrolase, putative, expressed
LOC_Os07g44900	NA	NA	NA	NA	-2.23921	0.0122503	NA	NA	NA	NA	3	gibberellin receptor GID1L2, putative, expressed
LOC_Os07g45550	2.92513	7.26988e-06	NA	NA	NA	NA	NA	NA	NA	NA	1	expressed protein
LOC_Os07g46030	NA	NA	2.20214	5.23319e-08	2.56936	3.0847e-12	2.74912	6.45334e-15	2.07294	4.14569e-08	1	expressed protein
LOC_Os07g46060	NA	NA	NA	NA	NA	NA	2.70849	6.83779e-08	NA	NA	1	expressed protein
LOC_Os07g46320	NA	NA	NA	NA	NA	NA	-3.72961	4.31489e-14	-4.95104	1.31443e-19	3	uncharacterized UPF0114 domain containing protein, expressed
LOC_Os07g46420	NA	NA	NA	NA	NA	NA	-2.79954	9.09873e-22	NA	NA	3	expressed protein
LOC_Os07g46510	NA	NA	NA	NA	NA	NA	NA	NA	-2.02391	0.00166637	3	expressed protein
LOC_Os07g46520	NA	NA	NA	NA	NA	NA	-3.16507	4.09182e-84	-2.80519	4.11765e-68	3	rhythmically expressed gene 2 protein, putative, expressed
LOC_Os07g46670	2.57585	1.81782e-29	NA	NA	NA	NA	NA	NA	NA	NA	1	early response to dehydration 15, putative, expressed
LOC_Os07g46846	NA	NA	NA	NA	NA	NA	NA	NA	2.06723	0.00138511	1	sex determination protein tasselseed-2, putative, expressed
LOC_Os07g46860	NA	NA	NA	NA	2.92025	0.0085605	3.83187	2.31942e-05	NA	NA	1	sex determination protein tasselseed-2, putative, expressed
LOC_Os07g46920	NA	NA	4.0241	0.0359899	5.82294	0.000207044	4.51751	0.00390795	4.5772	0.00377523	1	sex determination protein tasselseed-2, putative, expressed
LOC_Os07g46950	NA	NA	NA	NA	NA	NA	NA	NA	3.46733	0.00844137	1	ligA, putative, expressed
LOC_Os07g47210	NA	NA	NA	NA	NA	NA	NA	NA	2.34258	0.00169277	1	GDSL-like lipase/acylhydrolase, putative, expressed
LOC_Os07g47450	NA	NA	NA	NA	NA	NA	-2.29776	0.000452575	-2.03929	0.00299444	3	flowering promoting factor-like 1, putative, expressed
LOC_Os07g47640	NA	NA	NA	NA	NA	NA	-2.27388	1.56871e-07	-4.18265	1.03889e-20	3	ultraviolet-B-repressible protein, putative, expressed
LOC_Os07g48010	NA	NA	NA	NA	2.17481	0.00193301	NA	NA	NA	NA	1	peroxidase precursor, putative, expressed
LOC_Os07g48020	NA	NA	NA	NA	3.50028	6.36089e-12	3.93448	5.55275e-15	NA	NA	1	peroxidase precursor, putative, expressed
LOC_Os07g48060	NA	NA	NA	NA	NA	NA	NA	NA	2.85466	0.000268922	1	peroxidase precursor, putative, expressed
LOC_Os07g48510	NA	NA	NA	NA	NA	NA	3.19751	1.28464e-42	NA	NA	1	thioredoxin, putative, expressed
LOC_Os07g48570	NA	NA	NA	NA	NA	NA	NA	NA	-7.46981	0	3	expressed protein
LOC_Os07g48680	NA	NA	NA	NA	2.40888	8.92856e-05	NA	NA	NA	NA	1	zinc finger, C3HC4 type domain containing protein, expressed
LOC_Os07g48730	2.80032	5.47052e-09	NA	NA	2.16144	2.33543e-05	2.54849	5.99693e-08	2.24112	4.18433e-06	1	tyrosine protein kinase domain containing protein, putative, expressed
LOC_Os07g48760	NA	NA	NA	NA	NA	NA	NA	NA	2.21743	0.000434573	1	CAMK_KIN1/SNF1/Nim1_like.32 - CAMK includes calcium/calmodulin depedent protein kinases, expressed
LOC_Os07g49310	NA	NA	NA	NA	NA	NA	NA	NA	2.30934	2.70259e-23	1	omega-3 fatty acid desaturase, chloroplast precursor, putative, expressed
LOC_Os07g49460	NA	NA	NA	NA	NA	NA	NA	NA	-4.25833	1.19813e-223	3	response regulator receiver domain containing protein, expressed
LOC_Os08g01380	NA	NA	NA	NA	NA	NA	-2.93185	6.8469e-37	NA	NA	3	2Fe-2S iron-sulfur cluster binding domain containing protein, expressed
LOC_Os08g01830	2.01064	1.7314e-06	NA	NA	NA	NA	NA	NA	NA	NA	1	TKL_IRAK_CR4L.6 - The CR4L subfamily has homology with Crinkly4, expressed
LOC_Os08g01950	NA	NA	NA	NA	NA	NA	NA	NA	3.048	0.000558644	1	transferase family protein, putative, expressed
LOC_Os08g02030	NA	NA	2.86417	1.84053e-14	2.5818	4.00489e-12	2.39291	6.05671e-11	NA	NA	1	transferase family protein, putative, expressed
LOC_Os08g02210	NA	NA	NA	NA	-2.08543	8.63534e-46	-4.60742	6.62989e-163	-4.05591	2.51218e-138	3	expressed protein
LOC_Os08g02230	NA	NA	NA	NA	NA	NA	2.07544	1.91838e-12	3.10408	1.93672e-25	1	FAD-binding and arabino-lactone oxidase domains containing protein, putative, expressed
LOC_Os08g02700	NA	NA	NA	NA	2.10881	5.01299e-11	2.17107	4.09909e-12	NA	NA	1	fructose-bisphospate aldolase isozyme, putative, expressed
LOC_Os08g03020	NA	NA	NA	NA	NA	NA	NA	NA	2.58017	8.84209e-19	1	lectin-like receptor kinase 1, putative, expressed
LOC_Os08g03070	NA	NA	NA	NA	4.63687	0.000416965	6.34622	8.12355e-12	5.11279	5.72679e-06	1	lectin-like receptor kinase 1, putative, expressed
LOC_Os08g03240	3.51597	1.25227e-05	2.76519	0.00217286	NA	NA	2.7412	0.000810789	2.40612	0.00667121	1	lectin-like receptor kinase 1, putative, expressed
LOC_Os08g03310	NA	NA	NA	NA	NA	NA	NA	NA	-3.08318	2.6416e-20	3	zinc finger family protein, putative, expressed
LOC_Os08g04240	NA	NA	NA	NA	NA	NA	3.55024	0.00012828	3.08572	0.00263232	1	cysteine-rich repeat secretory protein 55 precursor, putative, expressed
LOC_Os08g04340	6.3301	1.0134e-60	7.09705	1.84497e-74	5.75037	9.77995e-50	5.57939	3.7929e-48	3.90778	3.27225e-22	2	plastocyanin-like domain containing protein, putative, expressed
LOC_Os08g04350	6.2324	8.91177e-47	6.4127	5.99801e-49	5.15502	1.4121e-30	4.54124	8.77147e-24	2.28767	9.53299e-05	2	plastocyanin-like domain containing protein, putative, expressed
LOC_Os08g04360	5.88886	2.97237e-51	5.27731	4.10008e-36	2.37434	0.00122827	2.8116	3.01286e-06	NA	NA	1	plastocyanin-like domain containing protein, putative, expressed
LOC_Os08g04370	5.77358	1.55829e-21	6.8464	1.08788e-32	5.23801	2.43452e-16	5.01301	1.49533e-15	2.55744	0.00730633	2	plastocyanin-like domain containing protein, putative, expressed
LOC_Os08g04450	NA	NA	NA	NA	NA	NA	3.30123	4.6969e-70	NA	NA	1	DAG protein, chloroplast precursor, putative, expressed
LOC_Os08g04500	NA	NA	NA	NA	-4.80794	3.91087e-16	-8.40055	3.56315e-36	-5.65365	5.29856e-21	3	terpene synthase, putative, expressed
LOC_Os08g04540	3.47023	6.79872e-07	4.74663	4.57363e-14	6.46174	3.44094e-27	6.73847	3.86066e-30	5.47342	4.63464e-20	2	decarboxylase, putative, expressed
LOC_Os08g04630	2.41299	1.98204e-30	4.2466	2.2009e-86	3.65896	7.50402e-67	3.1078	1.66122e-50	NA	NA	1	external NADH-ubiquinone oxidoreductase 1, mitochondrial precursor, putative, expressed
LOC_Os08g04800	6.0209	4.03042e-17	3.77648	0.00204192	3.8128	0.000505148	3.41045	0.00447751	NA	NA	1	triacylglycerol lipase like protein, putative, expressed
LOC_Os08g04830	NA	NA	NA	NA	NA	NA	-2.12857	1.29095e-30	NA	NA	3	expressed protein
LOC_Os08g04840	NA	NA	NA	NA	NA	NA	-2.23024	3.18149e-22	NA	NA	3	MYB family transcription factor, putative, expressed
LOC_Os08g05480	NA	NA	NA	NA	NA	NA	2.14218	5.08128e-07	2.31065	6.13547e-08	1	OsFBX261 - F-box domain containing protein, expressed
LOC_Os08g05620	NA	NA	NA	NA	NA	NA	-2.13508	6.19378e-37	NA	NA	3	cytochrome P450, putative, expressed
LOC_Os08g06110	NA	NA	NA	NA	-3.09444	7.78558e-87	-6.60698	5.84056e-291	-4.74885	1.85581e-178	3	MYB family transcription factor, putative, expressed
LOC_Os08g06540	2.1554	0.01011	NA	NA	NA	NA	NA	NA	3.09462	2.52511e-07	1	expressed protein
LOC_Os08g07100	NA	NA	NA	NA	5.39944	0.00709486	NA	NA	NA	NA	1	terpene synthase, putative, expressed
LOC_Os08g07620	6.20066	0.000115571	NA	NA	NA	NA	NA	NA	NA	NA	1	expressed protein
LOC_Os08g07630	7.63721	2.09771e-13	NA	NA	NA	NA	NA	NA	NA	NA	2	expressed protein
LOC_Os08g07660	3.35772	9.37692e-12	NA	NA	NA	NA	NA	NA	NA	NA	1	expressed protein
LOC_Os08g08120	NA	NA	NA	NA	NA	NA	NA	NA	-4.96524	7.66443e-106	3	B-box zinc finger family protein, putative, expressed
LOC_Os08g08140	NA	NA	NA	NA	NA	NA	-2.26202	1.78543e-25	-3.27642	7.38286e-43	3	receptor-like kinase, putative, expressed
LOC_Os08g08440	NA	NA	NA	NA	NA	NA	NA	NA	-2.77395	2.07558e-15	3	expressed protein
LOC_Os08g08990	NA	NA	NA	NA	NA	NA	3.58286	2.27794e-12	3.93042	2.02942e-14	1	Cupin domain containing protein, expressed
LOC_Os08g09000	NA	NA	NA	NA	NA	NA	2.73637	6.05115e-06	4.48619	3.04393e-17	1	Cupin domain containing protein, expressed
LOC_Os08g09010	NA	NA	NA	NA	NA	NA	2.77065	8.87508e-11	4.22327	3.08823e-23	1	Cupin domain containing protein, expressed
LOC_Os08g09020	NA	NA	NA	NA	NA	NA	NA	NA	5.09837	9.491e-06	1	Cupin domain containing protein, expressed
LOC_Os08g09040	NA	NA	NA	NA	NA	NA	3.45175	0.00025928	5.2558	2.04502e-10	1	Cupin domain containing protein, expressed
LOC_Os08g09060	NA	NA	NA	NA	2.20917	3.19112e-05	3.72472	6.25819e-14	4.42885	2.11727e-18	1	Cupin domain containing protein, expressed
LOC_Os08g09080	NA	NA	NA	NA	3.44125	3.21481e-11	3.80275	2.36361e-14	3.73328	9.15513e-14	1	Cupin domain containing protein, expressed
LOC_Os08g09370	NA	NA	NA	NA	NA	NA	NA	NA	-2.42987	2.50134e-14	1	polyprenyl synthetase, putative, expressed
LOC_Os08g09720	NA	NA	NA	NA	NA	NA	2.25517	0.000153015	NA	NA	1	OsFBX272 - F-box domain containing protein, expressed
LOC_Os08g09790	NA	NA	NA	NA	2.62349	0.0444936	NA	NA	NA	NA	1	expressed protein
LOC_Os08g10010	NA	NA	NA	NA	NA	NA	NA	NA	3.07944	2.00451e-05	1	acyl-desaturase, chloroplast precursor, putative, expressed
LOC_Os08g10020	NA	NA	NA	NA	NA	NA	NA	NA	-2.78286	1.20807e-41	3	photosystem II 10 kDa polypeptide, chloroplast precursor, putative, expressed
LOC_Os08g10290	NA	NA	2.21732	4.53856e-10	2.57543	1.92823e-13	2.91282	3.01676e-17	NA	NA	1	SHR5-receptor-like kinase, putative, expressed
LOC_Os08g10304	NA	NA	NA	NA	NA	NA	NA	NA	5.63121	0.000798469	1	expressed protein
LOC_Os08g10310	NA	NA	NA	NA	NA	NA	NA	NA	2.22954	0.000229444	1	SHR5-receptor-like kinase, putative, expressed
LOC_Os08g12449	NA	NA	NA	NA	NA	NA	-4.239	5.08883e-46	-3.92201	2.13955e-42	3	expressed protein
LOC_Os08g13270	2.48785	0.00335803	NA	NA	NA	NA	NA	NA	2.54583	0.000280517	1	expressed protein
LOC_Os08g13440	NA	NA	NA	NA	NA	NA	NA	NA	2.20967	2.19847e-06	1	cupin domain containing protein, expressed
LOC_Os08g14109	NA	NA	NA	NA	NA	NA	NA	NA	3.82982	1.25448e-05	1	retrotransposon protein, putative, Ty1-copia subclass, expressed
LOC_Os08g14320	NA	NA	2.03997	0.000529815	2.14096	6.24122e-05	2.08801	6.0471e-05	NA	NA	1	zinc finger, C3HC4 type domain containing protein, expressed
LOC_Os08g14940	NA	NA	NA	NA	NA	NA	-2.07386	3.36727e-07	NA	NA	3	receptor kinase, putative, expressed
LOC_Os08g14960	NA	NA	NA	NA	NA	NA	-2.31779	0.000102077	-4.73855	1.52366e-11	3	receptor-like protein kinase precursor, putative, expressed
LOC_Os08g15050	NA	NA	NA	NA	NA	NA	NA	NA	-3.56467	3.25829e-48	3	CCT/B-box zinc finger protein, putative, expressed
LOC_Os08g15650	NA	NA	2.07011	1.20914e-09	NA	NA	NA	NA	NA	NA	1	expressed protein
LOC_Os08g16050	NA	NA	NA	NA	NA	NA	2.19715	2.24035e-08	2.31544	4.50169e-09	1	tetraspanin family protein, putative, expressed
LOC_Os08g16070	NA	NA	NA	NA	NA	NA	NA	NA	2.17927	6.66568e-05	1	NB-ARC domain containing protein, expressed
LOC_Os08g16820	NA	NA	NA	NA	NA	NA	-2.12668	1.69253e-07	NA	NA	3	retrotransposon protein, putative, SINE subclass, expressed
LOC_Os08g16830	NA	NA	NA	NA	-2.00983	0.00593304	-2.9965	7.51574e-06	NA	NA	3	retrotransposon protein, putative, SINE subclass, expressed
LOC_Os08g17390	NA	NA	NA	NA	-2.20197	1.59096e-10	NA	NA	2.52678	4.76223e-15	3	expressed protein
LOC_Os08g17500	6.29939	2.32344e-05	5.91136	0.000704431	NA	NA	NA	NA	NA	NA	2	cinnamoyl-CoA reductase, putative, expressed
LOC_Os08g17784	NA	NA	NA	NA	NA	NA	NA	NA	-2.27848	0.0145668	3	purple acid phosphatase, putative, expressed
LOC_Os08g19694	NA	NA	NA	NA	NA	NA	NA	NA	3.34286	0.000431218	1	NB-ARC domain containing protein, expressed
LOC_Os08g24200	NA	NA	NA	NA	NA	NA	2.43882	0.000232501	NA	NA	1	expressed protein
LOC_Os08g24300	NA	NA	NA	NA	NA	NA	5.22848	6.85658e-05	NA	NA	1	expressed protein
LOC_Os08g24310	NA	NA	2.95534	7.62629e-39	2.30814	1.59924e-24	2.3003	4.77128e-25	NA	NA	1	receptor-like protein kinase precursor, putative, expressed
LOC_Os08g24630	NA	NA	NA	NA	5.97814	0.000145337	6.32657	7.26355e-05	5.44277	0.00262012	2	protein kinase domain containing protein, expressed
LOC_Os08g24770	NA	NA	NA	NA	NA	NA	-2.12008	7.21831e-08	NA	NA	3	protein kinase, putative, expressed
LOC_Os08g25670	NA	NA	NA	NA	NA	NA	6.41022	2.13144e-05	NA	NA	1	expressed protein
LOC_Os08g26220	NA	NA	NA	NA	NA	NA	NA	NA	2.05069	0.000760078	1	expressed protein
LOC_Os08g26230	NA	NA	NA	NA	NA	NA	3.14645	3.4594e-05	3.26089	2.24219e-05	1	expressed protein
LOC_Os08g28170	NA	NA	NA	NA	NA	NA	2.02287	5.21393e-16	3.22179	8.6347e-40	1	nucleobase-ascorbate transporter, putative, expressed
LOC_Os08g28240	NA	NA	NA	NA	NA	NA	3.62598	9.61509e-10	4.90007	1.83189e-16	1	carotenoid cleavage dioxygenase, putative, expressed
LOC_Os08g28400	NA	NA	NA	NA	NA	NA	NA	NA	5.04571	1.83554e-14	1	expressed protein
LOC_Os08g28710	4.41961	9.38572e-80	2.7126	2.09804e-28	NA	NA	NA	NA	NA	NA	1	receptor protein kinase CRINKLY4 precursor, putative, expressed
LOC_Os08g28880	NA	NA	5.69059	0.00160737	5.57594	0.00131435	NA	NA	NA	NA	2	patatin, putative, expressed
LOC_Os08g29170	NA	NA	NA	NA	NA	NA	-2.78809	1.38151e-19	-2.18476	1.43257e-12	3	dehydrogenase, putative, expressed
LOC_Os08g29570	NA	NA	2.00003	8.15537e-17	2.1989	3.04475e-20	2.42775	6.53055e-25	NA	NA	1	pleiotropic drug resistance protein 3, putative, expressed
LOC_Os08g29600	NA	NA	NA	NA	NA	NA	-2.38117	5.39316e-16	NA	NA	3	seed maturation protein PM41, putative, expressed
LOC_Os08g29660	3.27674	1.40261e-16	NA	NA	NA	NA	NA	NA	NA	NA	1	WRKY69, expressed
LOC_Os08g29980	NA	NA	NA	NA	NA	NA	NA	NA	-2.3143	6.85012e-05	3	retrotransposon protein, putative, unclassified, expressed
LOC_Os08g30100	NA	NA	NA	NA	6.71344	3.83896e-05	8.72699	1.60813e-10	8.74311	1.97822e-10	2	1-aminocyclopropane-1-carboxylate oxidase homolog 1, putative, expressed
LOC_Os08g30770	NA	NA	NA	NA	NA	NA	2.14488	9.49885e-16	NA	NA	1	ABC transporter, ATP-binding protein, putative, expressed
LOC_Os08g30910	NA	NA	NA	NA	NA	NA	NA	NA	-5.49946	8.44665e-26	3	YDG/SRA domain containing protein, expressed
LOC_Os08g31090	3.04738	1.28811e-10	NA	NA	NA	NA	NA	NA	NA	NA	1	expressed protein
LOC_Os08g31200	NA	NA	NA	NA	-4.24851	0.000999412	-4.53416	0.000185816	-3.44378	0.00548683	3	cytokinin-O-glucosyltransferase 2, putative, expressed
LOC_Os08g31630	NA	NA	NA	NA	NA	NA	NA	NA	-3.84857	1.04121e-56	3	uncharacterized glycosyl hydrolase Rv2006/MT2062, putative, expressed
LOC_Os08g31850	6.21558	0.000134795	NA	NA	NA	NA	NA	NA	NA	NA	1	expressed protein
LOC_Os08g31860	NA	NA	NA	NA	NA	NA	5.96978	2.01423e-07	NA	NA	1	expressed protein
LOC_Os08g32140	NA	NA	NA	NA	NA	NA	3.07535	0.00401762	2.95991	0.0106323	1	retrotransposon protein, putative, unclassified, expressed
LOC_Os08g32750	NA	NA	NA	NA	NA	NA	4.22901	2.78435e-05	4.68012	5.39405e-06	1	bifunctional monodehydroascorbate reductase and carbonic anhydrasenectarin-3 precursor, putative, expressed
LOC_Os08g32780	NA	NA	NA	NA	NA	NA	4.46004	1.7576e-06	4.68071	6.62609e-07	1	bifunctional monodehydroascorbate reductase and carbonic anhydrasenectarin-3 precursor, putative, expressed
LOC_Os08g32930	NA	NA	NA	NA	NA	NA	3.6341	1.8165e-64	NA	NA	1	expressed protein
LOC_Os08g32960	NA	NA	NA	NA	NA	NA	NA	NA	-5.30196	3.90968e-06	3	endonuclease/exonuclease/phosphatase family domain containing protein, expressed
LOC_Os08g33710	NA	NA	NA	NA	-2.31997	9.54459e-09	-3.84892	3.39686e-21	-3.17037	1.71025e-15	3	ribonuclease T2 family domain containing protein, expressed
LOC_Os08g33820	NA	NA	NA	NA	NA	NA	NA	NA	-12.5934	8.3653e-202	3	chlorophyll A-B binding protein, putative, expressed
LOC_Os08g34210	NA	NA	NA	NA	NA	NA	-2.39425	4.70063e-93	NA	NA	3	aldehyde dehydrogenase, putative, expressed
LOC_Os08g34500	NA	NA	NA	NA	NA	NA	-2.90222	4.38101e-12	-2.21744	5.77681e-08	3	expressed protein
LOC_Os08g34790	2.68194	1.24384e-35	3.18904	1.43249e-48	2.913	2.98198e-41	2.53949	2.67435e-33	NA	NA	1	AMP-binding domain containing protein, expressed
LOC_Os08g34800	3.99661	1.67742e-10	2.94982	0.000130464	NA	NA	NA	NA	NA	NA	1	expressed protein
LOC_Os08g35600	2.80345	4.33938e-10	NA	NA	NA	NA	2.12518	1.87549e-06	NA	NA	1	tyrosine protein kinase domain containing protein, putative, expressed
LOC_Os08g35860	NA	NA	NA	NA	NA	NA	NA	NA	-2.0512	4.16934e-20	3	cytokinin dehydrogenase precursor, putative, expressed
LOC_Os08g36480	NA	NA	NA	NA	NA	NA	-2.6695	1.1284e-05	-3.96198	3.66825e-10	3	nitrate reductase, putative, expressed
LOC_Os08g36680	NA	NA	NA	NA	NA	NA	NA	NA	-2.22562	6.65139e-08	3	bifunctional monodehydroascorbate reductase and carbonic anhydrasenectarin-3 precursor, putative, expressed
LOC_Os08g36920	5.39644	5.72403e-08	NA	NA	NA	NA	NA	NA	NA	NA	1	AP2 domain containing protein, expressed
LOC_Os08g37010	NA	NA	NA	NA	NA	NA	-2.50219	4.44655e-11	NA	NA	3	gibberellin receptor GID1L2, putative, expressed
LOC_Os08g37050	NA	NA	NA	NA	5.11295	0.0146277	5.6103	0.00111107	5.26437	0.00619205	2	gibberellin receptor GID1L2, putative, expressed
LOC_Os08g37250	NA	NA	NA	NA	-2.19475	9.42324e-05	-4.55048	1.34693e-12	-2.74526	4.18132e-07	3	patatin, putative, expressed
LOC_Os08g37300	NA	NA	NA	NA	2.24831	0.00106688	NA	NA	3.72325	3.25318e-09	1	expressed protein
LOC_Os08g37456	NA	NA	NA	NA	2.39784	4.68343e-26	3.32191	3.06351e-49	NA	NA	1	flavonol synthase/flavanone 3-hydroxylase, putative, expressed
LOC_Os08g37660	5.89773	6.54215e-58	4.23752	9.71076e-29	2.49984	5.33841e-09	3.44231	1.98225e-19	NA	NA	1	plastocyanin-like domain containing protein, putative, expressed
LOC_Os08g37840	NA	NA	NA	NA	NA	NA	-3.13353	6.26085e-10	NA	NA	3	phosphate-induced protein 1 conserved region domain containing protein, expressed
LOC_Os08g37940	NA	NA	NA	NA	NA	NA	NA	NA	2.34209	7.56704e-13	1	HAD-superfamily hydrolase subfamily IA, variant 3, putative, expressed
LOC_Os08g38110	NA	NA	NA	NA	NA	NA	2.75215	0.000120579	2.61344	0.000461542	1	cytokinin-O-glucosyltransferase 1, putative, expressed
LOC_Os08g38270	NA	NA	NA	NA	NA	NA	-2.99025	0.000929466	NA	NA	3	fasciclin domain containing protein, expressed
LOC_Os08g38600	NA	NA	NA	NA	2.15951	0.000302994	2.51894	1.50837e-06	NA	NA	1	copine, putative, expressed
LOC_Os08g38850	NA	NA	NA	NA	2.12252	6.71181e-12	3.5692	8.1279e-34	NA	NA	1	phosphatidylinositol transfer, putative, expressed
LOC_Os08g39180	NA	NA	NA	NA	NA	NA	NA	NA	5.63944	0.000823561	1	OsWAK73 - OsWAK receptor-like protein kinase, expressed
LOC_Os08g39220	NA	NA	NA	NA	NA	NA	NA	NA	5.33315	0.00690724	1	OsWAK75 - OsWAK receptor-like protein kinase, expressed
LOC_Os08g39240	NA	NA	NA	NA	NA	NA	NA	NA	2.80056	6.41222e-06	1	OsWAK76 - OsWAK receptor-like cytoplasmic kinase OsWAK-RLCK, expressed
LOC_Os08g39370	NA	NA	NA	NA	NA	NA	NA	NA	-5.35842	2.76209e-77	3	citrate transporter, putative, expressed
LOC_Os08g39550	NA	NA	NA	NA	NA	NA	NA	NA	-2.03406	0.000143941	3	polygalacturonase inhibitor 2 precursor, putative, expressed
LOC_Os08g39590	NA	NA	-2.7273	0.0150364	NA	NA	NA	NA	NA	NA	3	inactive receptor kinase At2g26730 precursor, putative, expressed
LOC_Os08g39730	NA	NA	3.49132	9.53359e-10	4.91466	1.43761e-18	5.4732	4.37791e-23	2.71915	1.71914e-06	1	cytochrome P450, putative, expressed
LOC_Os08g39780	NA	NA	NA	NA	NA	NA	4.35123	0.000475709	NA	NA	1	retrotransposon protein, putative, unclassified
LOC_Os08g39810	NA	NA	NA	NA	3.39997	0.0240078	8.44831	6.0347e-47	5.2891	2.74148e-10	1	retrotransposon protein, putative, unclassified, expressed
LOC_Os08g39840	NA	NA	NA	NA	NA	NA	2.33897	8.36839e-07	NA	NA	1	lipoxygenase, chloroplast precursor, putative, expressed
LOC_Os08g39850	2.15147	1.58833e-05	2.24027	4.63369e-06	2.37539	4.99885e-07	2.86053	3.75864e-10	NA	NA	1	lipoxygenase, chloroplast precursor, putative, expressed
LOC_Os08g40160	NA	NA	NA	NA	NA	NA	NA	NA	-2.69397	7.7767e-62	1	thylakoid lumen protein, chloroplast precursor, putative, expressed
LOC_Os08g40270	6.02712	1.043e-22	5.26453	8.13494e-15	5.97253	4.10759e-22	5.87194	1.21851e-21	3.59025	2.76646e-06	2	lectin-like protein kinase, putative, expressed
LOC_Os08g40555	NA	NA	NA	NA	NA	NA	NA	NA	5.47283	0.00246888	1	ATPase, E1-E2 type, putative, expressed
LOC_Os08g40690	NA	NA	NA	NA	3.6495	0.00024731	NA	NA	NA	NA	1	glycosyl hydrolase, putative, expressed
LOC_Os08g40850	2.19109	1.13651e-24	2.0024	1.85665e-20	NA	NA	NA	NA	NA	NA	1	mitochondrial carrier protein, putative, expressed
LOC_Os08g40910	NA	NA	NA	NA	NA	NA	-3.66229	3.48596e-11	NA	NA	3	expressed protein
LOC_Os08g40930	NA	NA	NA	NA	NA	NA	NA	NA	2.47565	1.09191e-37	1	Alpha amylase, catalytic domain containing protein, expressed
LOC_Os08g41090	NA	NA	NA	NA	NA	NA	2.04739	2.0765e-46	NA	NA	1	peroxidase precursor, putative, expressed
LOC_Os08g41489	NA	NA	NA	NA	2.39865	0.00016319	4.16257	2.67138e-14	2.20801	0.000316617	1	expressed protein
LOC_Os08g41650	NA	NA	NA	NA	NA	NA	NA	NA	-2.52406	0.00130586	1	expressed protein
LOC_Os08g41670	NA	NA	2.24247	0.000315999	NA	NA	NA	NA	2.09513	0.000137638	1	uncharacterized protein family UPF0016 domain containing protein, expressed
LOC_Os08g42440	NA	NA	NA	NA	NA	NA	2.627	1.10342e-56	NA	NA	1	CCT/B-box zinc finger protein, putative, expressed
LOC_Os08g42570	NA	NA	NA	NA	2.73322	5.92767e-06	3.18149	9.73617e-09	2.75192	2.06219e-06	1	plant protein of unknown function domain containing protein, expressed
LOC_Os08g42600	NA	NA	NA	NA	2.23626	2.38084e-06	2.45332	5.14006e-08	NA	NA	1	retinoblastoma-related protein-like, putative, expressed
LOC_Os08g42700	NA	NA	NA	NA	NA	NA	NA	NA	2.40643	7.114e-07	1	resistance protein, putative, expressed
LOC_Os08g42800	7.44925	3.90673e-11	6.70362	2.05748e-07	4.86963	0.0372166	NA	NA	NA	NA	2	expressed protein
LOC_Os08g43120	NA	NA	3.80298	1.98545e-06	NA	NA	NA	NA	NA	NA	1	Plant PDR ABC transporter associated domain containing protein, expressed
LOC_Os08g43390	NA	NA	NA	NA	NA	NA	NA	NA	-2.6365	0.000377561	1	cytochrome P450, putative, expressed
LOC_Os08g43550	NA	NA	NA	NA	NA	NA	NA	NA	2.26574	5.30049e-26	1	MYB family transcription factor, putative, expressed
LOC_Os08g44300	NA	NA	NA	NA	NA	NA	-2.68986	3.37588e-25	-4.04111	4.28057e-46	3	retrotransposon protein, putative, Ty3-gypsy subclass, expressed
LOC_Os08g44360	NA	NA	NA	NA	NA	NA	NA	NA	2.68443	0.000183062	1	male sterility protein 2, putative, expressed
LOC_Os08g44400	NA	NA	NA	NA	NA	NA	-2.26592	2.22184e-22	-3.05697	3.72242e-38	3	glutathione S-transferase, N-terminal domain containing protein, expressed
LOC_Os08g44590	NA	NA	NA	NA	2.0176	5.19432e-09	2.53227	2.23144e-14	NA	NA	1	gibberellin 20 oxidase 2, putative, expressed
LOC_Os08g44680	NA	NA	NA	NA	NA	NA	NA	NA	-3.90765	1.13924e-60	3	photosystem I reaction center subunit II, chloroplast precursor, putative, expressed
LOC_Os08g44950	2.24945	0.0203016	2.0584	0.04475	2.29885	0.00499109	NA	NA	2.14624	0.00611982	1	zinc finger, C3HC4 type domain containing protein, expressed
LOC_Os08g45190	NA	NA	NA	NA	-2.62341	2.35278e-11	-4.34252	5.58738e-27	-2.53882	5.43628e-11	3	PGR5, putative, expressed
LOC_Os09g01670	NA	NA	NA	NA	NA	NA	NA	NA	2.90681	0.000566085	1	peptidyl-prolyl cis-trans isomerase, FKBP-type, putative, expressed
LOC_Os09g04384	NA	NA	NA	NA	NA	NA	NA	NA	-2.1674	4.31904e-06	3	expressed protein
LOC_Os09g04710	NA	NA	NA	NA	5.11063	0.016299	5.59251	0.00134535	5.84576	0.000389324	1	GDSL-like lipase/acylhydrolase, putative, expressed
LOC_Os09g06464	NA	NA	NA	NA	-2.18981	3.08087e-16	-4.72425	1.3168e-51	-3.18413	1.27732e-31	3	CCT/B-box zinc finger protein, putative, expressed
LOC_Os09g07180	NA	NA	NA	NA	NA	NA	NA	NA	-2.97748	0.000505506	3	retrotransposon protein, putative, unclassified, expressed
LOC_Os09g07200	NA	NA	NA	NA	NA	NA	-2.1522	0.000332223	-2.49613	0.00010171	3	transposon protein, putative, unclassified, expressed
LOC_Os09g08130	2.28312	4.88614e-11	4.31121	8.63781e-37	4.2082	1.99592e-35	4.40226	2.30765e-39	2.43248	4.36219e-13	1	indole-3-glycerol phosphate synthase, chloroplast precursor, putative, expressed
LOC_Os09g09560	NA	NA	NA	NA	NA	NA	NA	NA	5.43249	0.00408898	1	expressed protein
LOC_Os09g09930	NA	NA	NA	NA	NA	NA	-2.07649	3.90729e-10	-2.14442	1.33e-10	3	heavy metal transport/detoxification protein, putative, expressed
LOC_Os09g09944	NA	NA	NA	NA	-2.34474	9.33739e-05	-3.99926	3.61531e-11	-3.54919	1.36713e-09	3	expressed protein
LOC_Os09g10340	NA	NA	NA	NA	-4.36469	0.0170616	-4.85309	0.00220584	-7.24371	0.000588798	3	cytochrome P450, putative, expressed
LOC_Os09g10690	NA	NA	NA	NA	-2.21456	0.00205831	-3.43719	4.41039e-07	-2.65506	6.10835e-05	3	expressed protein
LOC_Os09g10950	NA	NA	NA	NA	NA	NA	NA	NA	-2.16266	1.77988e-08	3	expressed protein
LOC_Os09g11460	NA	NA	NA	NA	2.10102	8.18952e-09	2.37008	2.09988e-11	NA	NA	1	AP2 domain containing protein, expressed
LOC_Os09g11480	NA	NA	NA	NA	4.03329	5.72321e-16	4.97755	5.42193e-23	NA	NA	1	AP2 domain containing protein, expressed
LOC_Os09g11500	NA	NA	NA	NA	NA	NA	2.02116	1.51442e-05	NA	NA	1	retrotransposon protein, putative, unclassified, expressed
LOC_Os09g12290	NA	NA	NA	NA	NA	NA	-2.93679	1.29705e-32	-3.58297	5.17339e-45	3	bifunctional aspartokinase/homoserine dehydrogenase, chloroplast precursor, putative, expressed
LOC_Os09g12650	NA	NA	NA	NA	NA	NA	NA	NA	2.42592	0.000179735	1	pyrophosphate--fructose 6-phosphate 1-phosphotransferase subunit alpha, putative, expressed
LOC_Os09g13590	NA	NA	NA	NA	NA	NA	NA	NA	2.69688	0.004349	1	expressed protein
LOC_Os09g13600	NA	NA	NA	NA	NA	NA	2.91142	6.58039e-21	2.60908	1.50495e-16	1	expressed protein
LOC_Os09g13650	NA	NA	NA	NA	NA	NA	NA	NA	-4.19699	0.0024993	3	microtubule-associated protein, putative, expressed
LOC_Os09g16449	NA	NA	NA	NA	NA	NA	NA	NA	2.88787	8.93429e-08	1	pleiotropic drug resistance protein 4, putative, expressed
LOC_Os09g17146	7.79976	5.39202e-35	5.09202	1.70716e-08	5.29852	8.26377e-10	5.07433	1.05945e-08	NA	NA	2	expressed protein
LOC_Os09g17152	7.34307	4.7143e-23	4.43989	0.00131142	5.84442	2.68046e-10	5.44395	2.68106e-08	NA	NA	2	OsFBX319 - F-box domain containing protein, expressed
LOC_Os09g17190	5.77203	0.000945883	NA	NA	NA	NA	5.42296	0.00270569	NA	NA	2	OsFBX320 - F-box domain containing protein, expressed
LOC_Os09g17740	NA	NA	NA	NA	NA	NA	NA	NA	-7.14406	1.04389e-172	3	chlorophyll A-B binding protein, putative, expressed
LOC_Os09g18020	NA	NA	NA	NA	NA	NA	NA	NA	5.78088	0.00035471	1	senescence-induced receptor-like serine/threonine-protein kinase precursor, putative, expressed
LOC_Os09g18230	NA	NA	NA	NA	NA	NA	NA	NA	2.63696	0.00011103	1	expressed protein
LOC_Os09g18260	NA	NA	NA	NA	NA	NA	NA	NA	5.05504	0.0111965	1	senescence-induced receptor-like serine/threonine-protein kinase precursor, putative, expressed
LOC_Os09g19229	NA	NA	NA	NA	NA	NA	2.52197	0.00060292	3.71793	3.42815e-07	1	protein kinase domain containing protein, expressed
LOC_Os09g19360	NA	NA	NA	NA	NA	NA	NA	NA	4.5424	0.000147878	1	senescence-induced receptor-like serine/threonine-protein kinase precursor, putative, expressed
LOC_Os09g19860	NA	NA	NA	NA	NA	NA	NA	NA	-2.8975	0.00380692	3	transposon protein, putative, unclassified, expressed
LOC_Os09g19880	NA	NA	NA	NA	NA	NA	2.27368	0.000463454	2.0562	0.00368039	1	expressed protein
LOC_Os09g19970	2.5795	0.00165495	NA	NA	2.71082	0.000179351	3.49987	2.67693e-09	NA	NA	1	expressed protein
LOC_Os09g20090	4.55136	3.57195e-23	4.48493	1.37822e-21	4.30274	2.19599e-20	4.46659	5.72342e-23	2.28344	2.43443e-05	2	L-ascorbate oxidase precursor, putative, expressed
LOC_Os09g20260	NA	NA	6.85844	1.10344e-06	7.59363	5.78008e-09	8.27859	1.19423e-11	NA	NA	2	polyamine oxidase precursor, putative, expressed
LOC_Os09g20510	NA	NA	NA	NA	NA	NA	NA	NA	3.79534	0.0044344	1	transporter, putative, expressed
LOC_Os09g20820	NA	NA	NA	NA	2.05107	8.97376e-19	NA	NA	NA	NA	1	enolase, putative, expressed
LOC_Os09g20930	NA	NA	NA	NA	NA	NA	-2.32259	1.42647e-13	NA	NA	3	expressed protein
LOC_Os09g21290	4.0775	9.86426e-17	3.98948	2.53838e-14	NA	NA	NA	NA	NA	NA	1	expressed protein
LOC_Os09g21380	NA	NA	NA	NA	NA	NA	-3.29882	5.63971e-08	NA	NA	3	expressed protein
LOC_Os09g23530	NA	NA	NA	NA	3.0346	8.24973e-10	3.98852	5.80871e-17	3.77504	2.80067e-15	1	dehydrogenase, putative, expressed
LOC_Os09g23560	NA	NA	NA	NA	4.56653	1.67771e-11	5.50452	2.10173e-17	4.92371	1.00373e-13	1	dehydrogenase, putative, expressed
LOC_Os09g23620	3.25022	2.88461e-19	NA	NA	NA	NA	NA	NA	NA	NA	1	MYB family transcription factor, putative, expressed
LOC_Os09g23820	NA	NA	NA	NA	NA	NA	-3.00162	2.73212e-12	NA	NA	3	cytochrome P450 72A1, putative, expressed
LOC_Os09g24580	2.26897	4.0581e-07	NA	NA	NA	NA	NA	NA	NA	NA	1	EF hand family protein, putative, expressed
LOC_Os09g25060	NA	NA	NA	NA	2.59875	0.00989145	NA	NA	NA	NA	1	WRKY76, expressed
LOC_Os09g25490	NA	NA	NA	NA	NA	NA	NA	NA	-2.75617	0.0097748	3	CESA9 - cellulose synthase, expressed
LOC_Os09g25690	NA	NA	NA	NA	NA	NA	NA	NA	-5.36204	0.00813796	3	retrotransposon protein, putative, unclassified, expressed
LOC_Os09g25810	NA	NA	NA	NA	-2.81424	4.27969e-08	-5.3734	3.45737e-21	-4.63313	3.36728e-18	3	nodulin, putative, expressed
LOC_Os09g25960	NA	NA	NA	NA	4.86406	0.0420106	NA	NA	NA	NA	1	glutamate receptor, putative, expressed
LOC_Os09g26210	NA	NA	NA	NA	NA	NA	-2.31113	0.000127927	NA	NA	3	ZOS9-12 - C2H2 zinc finger protein, expressed
LOC_Os09g26260	NA	NA	NA	NA	NA	NA	2.02273	3.94618e-06	NA	NA	1	AAA-type ATPase family protein, putative, expressed
LOC_Os09g26370	NA	NA	NA	NA	NA	NA	-2.52756	3.78056e-32	NA	NA	3	DUF581 domain containing protein, expressed
LOC_Os09g26620	NA	NA	NA	NA	NA	NA	2.50152	5.29801e-17	3.45196	1.26411e-29	1	auxin-repressed protein, putative, expressed
LOC_Os09g26670	NA	NA	NA	NA	-2.09076	4.50766e-08	-5.59522	1.87236e-34	-6.68508	4.56677e-40	3	expressed protein
LOC_Os09g26780	NA	NA	2.19871	3.29128e-08	NA	NA	NA	NA	NA	NA	1	zinc-finger protein, putative, expressed
LOC_Os09g26810	NA	NA	NA	NA	-2.16128	0.00103582	NA	NA	NA	NA	3	chlorophyll A-B binding protein, putative, expressed
LOC_Os09g26920	NA	NA	NA	NA	-2.12759	0.00637513	-3.31923	1.33528e-05	NA	NA	3	OsSub57 - Putative Subtilisin homologue, expressed
LOC_Os09g27010	NA	NA	NA	NA	2.31652	3.3352e-26	3.39305	1.22659e-57	NA	NA	1	tyrosine protein kinase domain containing protein, putative, expressed
LOC_Os09g27050	NA	NA	NA	NA	NA	NA	NA	NA	-2.12183	1.40612e-24	1	HD domain containing protein, putative, expressed
LOC_Os09g27260	NA	NA	2.06971	0.00196435	2.79619	3.39716e-07	3.19368	4.62391e-10	NA	NA	1	plant viral response family protein, putative, expressed
LOC_Os09g27500	NA	NA	6.2792	0.000225489	8.40659	5.11418e-12	8.75594	5.42655e-13	8.02945	2.85738e-10	2	cytochrome P450, putative, expressed
LOC_Os09g27510	NA	NA	NA	NA	NA	NA	NA	NA	4.2578	6.03886e-08	1	cytochrome P450, putative, expressed
LOC_Os09g27820	NA	NA	NA	NA	NA	NA	NA	NA	-2.27991	0.00375021	3	1-aminocyclopropane-1-carboxylate oxidase protein, putative, expressed
LOC_Os09g27890	-2.30006	0.000899014	NA	NA	NA	NA	NA	NA	NA	NA	3	lysM domain-containing GPI-anchored protein precursor, putative, expressed
LOC_Os09g28160	2.28119	2.57406e-19	2.74958	1.67075e-27	2.39044	3.1818e-21	2.23502	2.53938e-19	NA	NA	1	phosphate carrier protein, mitochondrial precursor, putative, expressed
LOC_Os09g28300	NA	NA	NA	NA	NA	NA	2.63699	3.76318e-06	NA	NA	1	remorin C-terminal domain containing protein, putative, expressed
LOC_Os09g28310	NA	NA	NA	NA	NA	NA	NA	NA	-2.01221	5.46374e-21	3	bZIP transcription factor, putative, expressed
LOC_Os09g28390	NA	NA	NA	NA	NA	NA	NA	NA	-2.5267	0.000250332	1	cytochrome P450, putative, expressed
LOC_Os09g28620	NA	NA	NA	NA	NA	NA	-2.75115	5.79273e-07	-3.00727	6.25842e-08	3	gibberellin receptor GID1L2, putative, expressed
LOC_Os09g28630	NA	NA	NA	NA	NA	NA	-2.10014	1.40265e-07	-2.92605	2.3563e-13	3	gibberellin receptor, putative, expressed
LOC_Os09g28640	NA	NA	NA	NA	NA	NA	-2.97552	0.000531857	-4.76894	1.13373e-07	3	gibberellin receptor GID1L2, putative, expressed
LOC_Os09g29310	3.02234	6.45661e-15	NA	NA	NA	NA	NA	NA	NA	NA	1	zinc finger, C3HC4 type domain containing protein, expressed
LOC_Os09g29490	NA	NA	NA	NA	NA	NA	2.23205	4.86571e-08	NA	NA	1	peroxidase precursor, putative, expressed
LOC_Os09g29510	NA	NA	2.373	7.26211e-07	3.21539	5.62896e-15	3.93449	8.25776e-25	2.28886	1.7004e-07	1	OsWAK80 - OsWAK receptor-like protein kinase, expressed
LOC_Os09g29584	NA	NA	NA	NA	NA	NA	NA	NA	2.25774	0.00311054	1	OsWAK84 - OsWAK receptor-like protein OsWAK-RLP, expressed
LOC_Os09g29660	2.73965	6.19745e-20	NA	NA	NA	NA	NA	NA	NA	NA	1	white-brown complex homolog protein 11, putative, expressed
LOC_Os09g30130	NA	NA	NA	NA	-2.28202	3.35789e-05	-4.59905	6.56173e-17	-4.45039	4.99764e-16	3	CSLE6 - cellulose synthase-like family E, expressed
LOC_Os09g30250	NA	NA	2.21946	0.0043831	NA	NA	NA	NA	NA	NA	1	OsSub58 - Putative Subtilisin homologue, expressed
LOC_Os09g30340	NA	NA	NA	NA	NA	NA	-2.7257	9.49658e-24	-4.17141	8.63812e-49	3	photosystem I reaction center subunit, chloroplast precursor, putative, expressed
LOC_Os09g30458	NA	NA	NA	NA	NA	NA	NA	NA	-3.61155	0.0104368	3	subtilisin-like protease, putative, expressed
LOC_Os09g31130	NA	NA	NA	NA	NA	NA	-2.73262	4.39355e-18	-2.7351	3.11464e-18	3	citrate transporter, putative, expressed
LOC_Os09g31170	NA	NA	NA	NA	NA	NA	2.29626	7.84631e-07	NA	NA	1	expressed protein
LOC_Os09g31200	NA	NA	NA	NA	NA	NA	NA	NA	-2.15761	8.25229e-15	1	AN1-like zinc finger domain containing protein, expressed
LOC_Os09g31380	NA	NA	NA	NA	3.42474	3.25903e-14	6.1066	5.16584e-66	5.09835	1.7341e-42	1	jmjC domain-containing protein 5, putative, expressed
LOC_Os09g31430	NA	NA	NA	NA	NA	NA	-3.7631	6.16767e-05	-2.63788	0.00173335	3	Os9bglu30 - beta-glucosidase, similar to Os4bglu12 exoglucanase, expressed
LOC_Os09g31482	NA	NA	NA	NA	NA	NA	-2.07435	5.57013e-49	NA	NA	3	splicing factor U2AF, putative, expressed
LOC_Os09g31502	NA	NA	NA	NA	NA	NA	-2.94306	4.59227e-15	NA	NA	3	dehydrogenase, putative, expressed
LOC_Os09g31506	NA	NA	NA	NA	NA	NA	-2.36644	4.41948e-20	-2.3855	8.64547e-20	3	dihydroflavonol-4-reductase, putative, expressed
LOC_Os09g32290	NA	NA	NA	NA	NA	NA	3.45272	0.00212952	NA	NA	1	FAD dependent oxidoreductase domain containing protein, expressed
LOC_Os09g32570	NA	NA	4.44984	9.45002e-27	4.32993	7.85977e-26	4.14334	3.89215e-24	3.30668	2.42483e-14	1	alcohol dehydrogenase GroES-like domain containing protein, expressed
LOC_Os09g32952	NA	NA	5.10675	0.0003121	5.62075	2.53756e-06	5.84155	5.29444e-07	NA	NA	2	L-ascorbate oxidase precursor, putative, expressed
LOC_Os09g33550	NA	NA	3.05178	9.19368e-08	2.44805	8.35878e-05	3.90522	4.32392e-17	NA	NA	1	CCT/B-box zinc finger protein, putative, expressed
LOC_Os09g33640	7.39389	1.62425e-07	5.4031	0.0187073	5.40746	0.00651585	NA	NA	NA	NA	2	expressed protein
LOC_Os09g33680	NA	NA	NA	NA	NA	NA	-2.55082	7.69749e-52	NA	NA	3	Os9bglu31 - beta-glucosidase, dhurrinase, similar to G. max hydroxyisourate hydrolase, expressed
LOC_Os09g34140	NA	NA	NA	NA	NA	NA	-2.21016	1.20366e-17	-3.00807	8.72824e-30	3	expressed protein
LOC_Os09g34180	NA	NA	NA	NA	NA	NA	-2.25611	7.95406e-11	-3.19885	3.05811e-18	3	formin, putative, expressed
LOC_Os09g34250	NA	NA	NA	NA	2.2657	0.025621	NA	NA	NA	NA	1	UDP-glucoronosyl and UDP-glucosyl transferase domain containing protein, expressed
LOC_Os09g34920	NA	NA	NA	NA	NA	NA	NA	NA	-2.66073	0.00105808	3	glycosyl hydrolase family 29, putative, expressed
LOC_Os09g35010	4.26626	8.30955e-13	NA	NA	NA	NA	NA	NA	NA	NA	1	dehydration-responsive element-binding protein, putative, expressed
LOC_Os09g35780	7.91385	5.0815e-11	NA	NA	NA	NA	NA	NA	NA	NA	2	BAP2, putative, expressed
LOC_Os09g35880	NA	NA	NA	NA	NA	NA	-3.52457	5.48986e-96	-8.54915	4.22213e-270	3	B-box zinc finger family protein, putative, expressed
LOC_Os09g35890	NA	NA	NA	NA	NA	NA	NA	NA	-2.63676	1.35699e-09	3	kinesin motor domain containing protein, expressed
LOC_Os09g36040	NA	NA	NA	NA	NA	NA	NA	NA	-3.94901	4.58755e-77	3	rhodanese-like domain containing protein, putative, expressed
LOC_Os09g36070	NA	NA	NA	NA	NA	NA	NA	NA	-2.43198	2.87683e-05	1	cytochrome P450, putative, expressed
LOC_Os09g36110	NA	NA	3.4719	0.00174439	NA	NA	NA	NA	NA	NA	1	OsSub59 - Putative Subtilisin homologue, expressed
LOC_Os09g36220	NA	NA	NA	NA	NA	NA	2.23558	2.80056e-41	-6.12764	3.40763e-166	3	response regulator receiver domain containing protein, expressed
LOC_Os09g36240	NA	NA	NA	NA	NA	NA	NA	NA	-2.22853	3.04043e-34	3	deoxyribodipyrimidine photolyase family protein, expressed
LOC_Os09g36320	2.08791	3.61501e-11	NA	NA	NA	NA	NA	NA	NA	NA	1	tyrosine protein kinase domain containing protein, putative, expressed
LOC_Os09g36619	NA	NA	NA	NA	NA	NA	2.36691	6.40488e-09	NA	NA	1	expressed protein
LOC_Os09g36630	NA	NA	NA	NA	NA	NA	2.08674	2.19794e-36	NA	NA	1	expressed protein
LOC_Os09g36680	NA	NA	NA	NA	NA	NA	-3.37653	4.88874e-09	-5.26763	6.35641e-18	3	ribonuclease T2 family domain containing protein, expressed
LOC_Os09g36700	NA	NA	NA	NA	-2.28062	0.0129937	-5.84897	9.46462e-12	-8.3907	8.5114e-19	3	ribonuclease T2 family domain containing protein, expressed
LOC_Os09g36730	NA	NA	NA	NA	NA	NA	2.69231	2.11854e-53	NA	NA	1	MYB family transcription factor, putative, expressed
LOC_Os09g37080	5.02838	1.98332e-28	2.93596	1.02743e-05	2.69544	5.08471e-05	2.49923	0.000129217	NA	NA	1	expressed protein
LOC_Os09g37120	2.19763	5.57838e-05	3.24347	2.50828e-11	2.74873	2.3761e-08	NA	NA	NA	NA	1	pyridoxal-dependent decarboxylase protein, putative, expressed
LOC_Os09g37180	5.36312	6.30996e-51	6.64252	5.83097e-81	5.62569	2.15919e-56	4.03098	7.15123e-26	NA	NA	2	transferase family protein, putative, expressed
LOC_Os09g37320	NA	NA	NA	NA	NA	NA	NA	NA	3.00835	0.00322352	1	retrotransposon protein, putative, unclassified, expressed
LOC_Os09g37330	NA	NA	NA	NA	NA	NA	NA	NA	2.59906	7.4186e-32	1	OsSAUR39 - Auxin-responsive SAUR gene family member, expressed
LOC_Os09g37344	NA	NA	NA	NA	NA	NA	NA	NA	2.27003	2.21676e-30	1	expressed protein
LOC_Os09g37350	NA	NA	NA	NA	NA	NA	3.12394	0.00206074	3.48673	0.000387456	1	OsSAUR40 - Auxin-responsive SAUR gene family member, expressed
LOC_Os09g37620	NA	NA	NA	NA	NA	NA	2.40951	1.29091e-53	NA	NA	1	flavin-containing monooxygenase family protein, putative, expressed
LOC_Os09g37834	3.30108	6.83872e-10	4.22274	5.27246e-17	3.68141	1.14408e-12	4.21712	7.48567e-18	3.22139	8.7897e-10	1	serine/threonine-protein kinase receptor precursor, putative, expressed
LOC_Os09g37880	NA	NA	NA	NA	3.07643	4.4218e-10	3.97108	4.07245e-17	3.44757	5.88916e-13	1	serine/threonine-protein kinase receptor precursor, putative, expressed
LOC_Os09g38090	NA	NA	NA	NA	NA	NA	-3.98511	3.1798e-62	NA	NA	3	expressed protein
LOC_Os09g38110	NA	NA	NA	NA	NA	NA	2.48132	1.10441e-05	NA	NA	1	RING-H2 finger protein, putative, expressed
LOC_Os09g38239	NA	NA	3.89292	8.54563e-05	4.5304	3.32442e-08	4.74564	6.4291e-10	3.79415	4.47321e-05	1	sulfotransferase domain containing protein, expressed
LOC_Os09g38350	NA	NA	3.03733	0.00101938	7.49297	2.13441e-27	7.70838	1.63369e-29	4.37376	6.52239e-10	2	AMP-binding domain containing protein, expressed
LOC_Os09g38620	NA	NA	NA	NA	NA	NA	-2.0326	2.84691e-32	NA	NA	3	NADPH reductase, putative, expressed
LOC_Os09g38800	NA	NA	2.25495	0.0197259	NA	NA	2.69307	0.000368082	2.57738	0.000845838	1	OsWAK88 - OsWAK pseudogene, expressed
LOC_Os09g38830	NA	NA	5.04047	4.51022e-06	5.39837	3.15826e-07	6.27876	3.63699e-11	4.75146	1.12448e-05	2	OsWAK89a - OsWAK receptor-like protein kinase, expressed
LOC_Os09g38834	NA	NA	5.90607	0.00048382	6.97228	4.27309e-09	7.33259	3.17323e-10	5.74358	0.000271996	2	OsWAK89b - OsWAK receptor-like protein kinase, expressed
LOC_Os09g38840	2.6359	0.00108785	4.95996	1.16538e-17	5.01728	5.61436e-19	4.97537	2.23153e-19	3.7371	1.05451e-09	2	OsWAK90 - OsWAK receptor-like protein kinase, expressed
LOC_Os09g38850	4.63036	1.04566e-18	5.16193	7.93211e-25	4.22727	1.23257e-14	4.31382	4.12211e-16	2.33633	0.00297105	2	OsWAK91 - OsWAK receptor-like protein kinase, expressed
LOC_Os09g38910	2.33387	1.0025e-09	NA	NA	NA	NA	NA	NA	NA	NA	1	OsWAK92 - OsWAK receptor-like protein kinase, expressed
LOC_Os09g38920	NA	NA	NA	NA	NA	NA	-2.13042	1.68258e-16	NA	NA	3	thiol protease SEN102 precursor, putative, expressed
LOC_Os09g39620	NA	NA	2.26995	9.09793e-05	2.93808	1.37083e-08	3.60785	2.41244e-13	NA	NA	1	protein kinase family protein, putative, expressed
LOC_Os09g39730	NA	NA	NA	NA	NA	NA	2.8439	0.000113217	NA	NA	1	Core histone H2A/H2B/H3/H4 domain containing protein, putative, expressed
LOC_Os09g39740	NA	NA	NA	NA	NA	NA	2.50019	3.04549e-44	NA	NA	1	ACT domain containing protein, expressed
LOC_Os09g39770	2.84423	1.10062e-12	2.54459	3.83785e-10	2.26084	2.75887e-08	2.61148	2.02139e-11	NA	NA	1	C2 domain containing protein, putative, expressed
LOC_Os09g39850	NA	NA	NA	NA	3.84568	0.0435034	NA	NA	NA	NA	1	AP2 domain containing protein, expressed
LOC_Os10g01080	NA	NA	NA	NA	-2.59242	8.18864e-11	-2.72202	1.56801e-12	NA	NA	3	SOR/SNZ family protein, putative, expressed
LOC_Os10g02040	NA	NA	NA	NA	2.3562	0.0139416	2.86628	0.000397802	5.07984	1.06023e-11	1	peroxidase precursor, putative, expressed
LOC_Os10g02250	NA	NA	3.22896	7.29182e-06	4.81013	2.64129e-15	6.1153	2.72613e-26	5.7964	2.24824e-23	1	OsWAK95 - OsWAK receptor-like protein kinase, expressed
LOC_Os10g02260	NA	NA	NA	NA	NA	NA	NA	NA	-4.19892	3.33453e-07	3	peptide transporter PTR2, putative, expressed
LOC_Os10g02880	NA	NA	NA	NA	NA	NA	-2.41727	8.4053e-08	NA	NA	3	O-methyltransferase, putative, expressed
LOC_Os10g03440	3.31988	3.55921e-06	2.15694	0.0133311	2.10737	0.00805618	3.05388	9.66698e-06	NA	NA	1	avr9/Cf-9 rapidly elicited protein 74, putative, expressed
LOC_Os10g05130	NA	NA	NA	NA	NA	NA	NA	NA	-2.6253	1.1169e-13	3	expressed protein
LOC_Os10g05160	NA	NA	NA	NA	NA	NA	NA	NA	5.72284	0.000925431	1	expressed protein
LOC_Os10g05230	NA	NA	NA	NA	NA	NA	NA	NA	2.00636	1.6079e-42	1	zinc finger, C3HC4 type domain containing protein, expressed
LOC_Os10g05660	4.27688	2.49586e-23	2.70625	9.74345e-09	NA	NA	NA	NA	NA	NA	1	thaumatin, putative, expressed
LOC_Os10g05780	NA	NA	NA	NA	NA	NA	NA	NA	-2.16038	9.86167e-06	3	POT domain containing peptide transporter, putative, expressed
LOC_Os10g06030	NA	NA	NA	NA	NA	NA	NA	NA	2.25847	4.33035e-06	1	OsWAK103 - OsWAK receptor-like protein kinase, expressed
LOC_Os10g07290	NA	NA	NA	NA	NA	NA	NA	NA	-3.40746	8.64586e-05	3	glycosyl hydrolases family 17, putative, expressed
LOC_Os10g07450	NA	NA	NA	NA	NA	NA	NA	NA	2.11873	0.000105774	1	expressed protein
LOC_Os10g07548	NA	NA	NA	NA	NA	NA	2.12096	0.0023754	2.2678	0.00123092	1	wall-associated receptor kinase-like 4 precursor, putative, expressed
LOC_Os10g08018	NA	NA	NA	NA	NA	NA	-2.37293	6.22332e-09	NA	NA	3	expressed protein
LOC_Os10g08360	NA	NA	NA	NA	NA	NA	NA	NA	-2.51844	0.0124843	3	transposon protein, putative, CACTA, En/Spm sub-class, expressed
LOC_Os10g08980	NA	NA	NA	NA	NA	NA	NA	NA	4.51015	2.49453e-06	1	zeaxanthin cleavage dioxygenase, chromoplast precursor, putative, expressed
LOC_Os10g10030	NA	NA	NA	NA	NA	NA	NA	NA	5.2956	0.00592578	1	OsWAK111 - OsWAK receptor-like protein kinase, expressed
LOC_Os10g10180	NA	NA	NA	NA	NA	NA	-2.09684	1.14235e-21	-5.37672	1.03542e-99	3	methyltransferase domain containing protein, putative, expressed
LOC_Os10g11500	NA	NA	NA	NA	NA	NA	NA	NA	5.78436	0.000548437	1	SCP-like extracellular protein, expressed
LOC_Os10g11889	NA	NA	NA	NA	NA	NA	NA	NA	-2.91736	9.36707e-08	3	expressed protein
LOC_Os10g13700	NA	NA	NA	NA	NA	NA	NA	NA	-2.25389	4.06354e-07	3	phosphoenolpyruvate carboxykinase, putative, expressed
LOC_Os10g13850	NA	NA	NA	NA	-2.85016	0.000578845	-5.16715	6.41452e-09	-5.36253	3.19909e-09	3	POEI17 - Pollen Ole e I allergen and extensin family protein precursor, expressed
LOC_Os10g18260	NA	NA	NA	NA	NA	NA	4.1046	0.00222012	3.52582	0.0110124	1	TKL_IRAK_DUF26-lc.27 - DUF26 kinases have homology to DUF26 containing loci, expressed
LOC_Os10g18370	NA	NA	NA	NA	-2.41177	4.05796e-27	-4.58641	6.89592e-79	NA	NA	3	transcriptional regulator, putative, expressed
LOC_Os10g18480	NA	NA	NA	NA	5.22508	0.0117145	5.74081	0.000686467	NA	NA	1	glucosyltransferase, putative, expressed
LOC_Os10g20160	NA	NA	2.13701	0.0166043	NA	NA	2.43255	0.000378735	2.01046	0.00941804	1	serine/threonine-protein kinase receptor precursor, putative, expressed
LOC_Os10g20230	NA	NA	NA	NA	NA	NA	-2.62537	3.74024e-26	NA	NA	3	expressed protein
LOC_Os10g20610	NA	NA	NA	NA	5.64349	0.00523607	9.55185	5.63705e-14	11.4191	3.56869e-22	2	laccase-15 precursor, putative, expressed
LOC_Os10g20890	NA	NA	NA	NA	-2.41305	0.00321557	-4.13213	1.19395e-06	-4.45177	1.25697e-07	3	LTPL137 - Protease inhibitor/seed storage/LTP family protein precursor, expressed
LOC_Os10g21266	NA	NA	NA	NA	NA	NA	NA	NA	-3.15598	0.0120498	3	ATP synthase subunit beta, putative, expressed
LOC_Os10g21670	NA	NA	NA	NA	NA	NA	2.91738	6.01377e-08	5.22383	9.31815e-21	1	dehydration stress-induced protein, putative, expressed
LOC_Os10g21860	NA	NA	NA	NA	-2.05738	0.00885762	NA	NA	-2.31933	0.00113715	3	expressed protein
LOC_Os10g22050	NA	NA	NA	NA	NA	NA	NA	NA	2.55141	0.00374322	1	expressed protein
LOC_Os10g22520	NA	NA	NA	NA	2.09438	7.24854e-18	2.33643	1.79195e-22	2.12408	9.97611e-19	1	cellulase, putative, expressed
LOC_Os10g23310	2.72839	8.42667e-14	3.13015	1.16538e-17	2.63059	5.10037e-13	2.06836	1.10862e-08	NA	NA	1	transferase family protein, putative, expressed
LOC_Os10g23900	7.31019	1.34597e-08	9.15691	3.05398e-21	11.0294	6.10661e-38	11.4469	2.13764e-40	7.58258	2.94685e-10	2	decarboxylase, putative, expressed
LOC_Os10g25040	NA	NA	NA	NA	NA	NA	-2.50654	1.61128e-17	NA	NA	3	red chlorophyll catabolite reductase, putative, expressed
LOC_Os10g25060	NA	NA	NA	NA	NA	NA	5.17	5.71553e-33	5.87276	1.46556e-42	1	expressed protein
LOC_Os10g25230	8.11751	2.56283e-17	4.85378	4.67227e-05	4.0147	0.0059349	4.30328	0.000409606	NA	NA	2	ZIM domain containing protein, putative, expressed
LOC_Os10g25290	3.35369	1.48534e-29	2.50516	3.31428e-17	NA	NA	NA	NA	NA	NA	1	ZIM domain containing protein, putative, expressed
LOC_Os10g25400	NA	NA	2.49194	3.86732e-09	NA	NA	NA	NA	NA	NA	1	GDSL-like lipase/acylhydrolase, putative, expressed
LOC_Os10g25420	NA	NA	NA	NA	NA	NA	2.15547	4.52676e-05	2.14811	5.06481e-05	1	GDSL-like lipase/acylhydrolase, putative, expressed
LOC_Os10g26620	NA	NA	NA	NA	NA	NA	NA	NA	-2.38311	7.58345e-58	3	dof zinc finger domain containing protein, putative, expressed
LOC_Os10g26670	NA	NA	NA	NA	NA	NA	-3.30905	2.891e-06	-5.68843	1.11336e-10	3	expressed protein
LOC_Os10g26940	NA	NA	NA	NA	3.68349	0.000148537	5.48982	1.07703e-08	6.58618	4.8089e-11	1	BURP domain containing protein, expressed
LOC_Os10g28080	NA	NA	NA	NA	NA	NA	2.47865	9.48678e-10	3.17972	7.38832e-15	1	glycosyl hydrolase, putative, expressed
LOC_Os10g28120	NA	NA	NA	NA	2.12043	0.0362166	NA	NA	2.23557	0.0108057	1	glycosyl hydrolase, putative, expressed
LOC_Os10g28299	NA	NA	NA	NA	4.03363	7.27087e-07	5.74819	9.44117e-17	6.02703	1.15799e-18	1	expressed protein
LOC_Os10g28360	NA	NA	NA	NA	NA	NA	-2.11664	6.30409e-33	-2.46939	1.27192e-43	3	1,2-dihydroxy-3-keto-5-methylthiopentene dioxygenase protein, putative, expressed
LOC_Os10g29470	NA	NA	NA	NA	-2.32868	2.01708e-13	-4.12063	3.2817e-35	-2.3606	2.9167e-14	3	dehydrogenase, putative, expressed
LOC_Os10g30390	NA	NA	NA	NA	2.80723	1.62399e-05	4.54194	5.00051e-14	4.16399	8.48553e-12	1	cytochrome P450, putative, expressed
LOC_Os10g30530	2.18729	9.49108e-07	NA	NA	NA	NA	NA	NA	NA	NA	1	lectin-like receptor kinase, putative, expressed
LOC_Os10g32070	NA	NA	NA	NA	NA	NA	-2.98981	0.000804533	-2.42069	0.000970811	3	GATA zinc finger domain containing protein, expressed
LOC_Os10g32810	NA	NA	NA	NA	NA	NA	-2.44154	3.70219e-07	NA	NA	3	beta-amylase, putative, expressed
LOC_Os10g32990	NA	NA	NA	NA	NA	NA	NA	NA	2.63949	0.000485326	1	receptor-like protein kinase 2 precursor, putative, expressed
LOC_Os10g33040	3.11761	3.38345e-24	3.31736	8.30302e-27	2.08434	6.64559e-11	NA	NA	NA	NA	1	receptor-like protein kinase precursor, putative, expressed
LOC_Os10g33130	2.0289	1.05971e-09	2.72427	5.33944e-17	2.27789	2.47429e-12	2.37772	6.98542e-14	NA	NA	1	leucine-rich repeat receptor protein kinase EXS precursor, putative, expressed
LOC_Os10g33190	NA	NA	NA	NA	NA	NA	-2.45035	3.16303e-16	-2.57437	1.53848e-17	3	expressed protein
LOC_Os10g33540	NA	NA	NA	NA	NA	NA	NA	NA	-2.16418	0.00517384	3	alcohol oxidase, putative, expressed
LOC_Os10g33780	NA	NA	NA	NA	NA	NA	2.71995	0.000504198	NA	NA	1	DUF640 domain containing protein, putative, expressed
LOC_Os10g34840	NA	NA	NA	NA	NA	NA	2.60121	1.31494e-06	NA	NA	1	RIPER6 - Ripening-related family protein precursor, expressed
LOC_Os10g35030	NA	NA	NA	NA	NA	NA	-3.14674	2.53817e-35	-2.95994	1.19818e-31	3	IAP100, putative, expressed
LOC_Os10g35070	NA	NA	NA	NA	NA	NA	-3.32077	7.91526e-24	-2.22072	4.58919e-12	3	alpha-galactosidase precursor, putative, expressed
LOC_Os10g35370	NA	NA	NA	NA	NA	NA	NA	NA	-2.53824	2.27477e-40	3	oxidoreductase, short chain dehydrogenase/reductase family domain containing family, expressed
LOC_Os10g35490	NA	NA	NA	NA	NA	NA	-2.48567	0.00166011	-3.06285	9.76659e-05	3	hydrolase, alpha/beta fold family domain containing protein, expressed
LOC_Os10g35950	NA	NA	2.13082	0.0175056	NA	NA	NA	NA	NA	NA	1	transferase family protein, putative, expressed
LOC_Os10g36030	NA	NA	NA	NA	NA	NA	2.12089	3.9645e-10	NA	NA	1	cytochrome b561, putative, expressed
LOC_Os10g36390	NA	NA	NA	NA	NA	NA	NA	NA	5.70981	0.000457376	1	monocopper oxidase, putative, expressed
LOC_Os10g36500	NA	NA	NA	NA	NA	NA	3.34945	6.1356e-20	NA	NA	1	invertase/pectin methylesterase inhibitor family protein, putative, expressed
LOC_Os10g36520	NA	NA	NA	NA	NA	NA	3.10309	0.00343117	NA	NA	1	expressed protein
LOC_Os10g36703	NA	NA	NA	NA	NA	NA	NA	NA	-2.26722	4.24712e-43	1	CPuORF40 - conserved peptide uORF-containing transcript, expressed
LOC_Os10g36848	NA	NA	NA	NA	2.30566	1.01946e-11	2.16599	7.16511e-11	NA	NA	1	cytochrome P450, putative, expressed
LOC_Os10g36924	NA	NA	NA	NA	NA	NA	-2.64932	3.40486e-30	NA	NA	3	aquaporin protein, putative, expressed
LOC_Os10g36980	NA	NA	NA	NA	NA	NA	NA	NA	2.09315	0.00128276	1	transposon protein, putative, unclassified, expressed
LOC_Os10g37120	5.57183	0.0043332	5.30463	0.0191673	NA	NA	NA	NA	NA	NA	2	transposon protein, putative, unclassified, expressed
LOC_Os10g37160	NA	NA	NA	NA	9.82837	2.80101e-14	8.32628	1.86108e-11	5.39447	1.50535e-05	2	transposon protein, putative, unclassified, expressed
LOC_Os10g37180	NA	NA	NA	NA	-2.33136	6.29583e-09	NA	NA	NA	NA	3	glycine cleavage system H protein, putative, expressed
LOC_Os10g37190	2.23532	1.03366e-15	NA	NA	NA	NA	NA	NA	NA	NA	1	protein kinase domain containing protein, expressed
LOC_Os10g37400	NA	NA	NA	NA	NA	NA	NA	NA	2.72923	0.000649131	1	DUF538 domain containing protein, putative, expressed
LOC_Os10g37570	5.30985	3.91748e-25	3.45239	5.91819e-08	3.98217	4.44026e-12	3.58984	9.90437e-10	NA	NA	1	OsFBDUF49 - F-box and DUF domain containing protein, expressed
LOC_Os10g37760	3.76048	3.37274e-38	NA	NA	NA	NA	NA	NA	NA	NA	1	OsRhmbd17 - Putative Rhomboid homologue, expressed
LOC_Os10g37860	NA	NA	NA	NA	NA	NA	5.61162	0.000631479	NA	NA	1	expressed protein
LOC_Os10g38080	NA	NA	NA	NA	NA	NA	NA	NA	-2.65762	4.7806e-09	3	OsSub61 - Putative Subtilisin homologue, expressed
LOC_Os10g38160	NA	NA	NA	NA	2.45572	0.000980274	3.4972	6.14552e-09	NA	NA	1	glutathione S-transferase, putative, expressed
LOC_Os10g38340	NA	NA	3.32799	0.00167437	4.01779	1.23018e-05	4.11147	2.45119e-06	3.50411	6.03946e-05	1	glutathione S-transferase GSTU6, putative, expressed
LOC_Os10g38350	NA	NA	NA	NA	6.34727	4.79908e-05	7.51459	2.25343e-08	6.37633	0.000244495	2	glutathione S-transferase, putative, expressed
LOC_Os10g38360	NA	NA	2.056	2.69784e-05	4.23138	5.31007e-26	4.94649	1.95124e-36	3.6013	2.49032e-19	1	glutathione S-transferase, putative, expressed
LOC_Os10g38580	NA	NA	NA	NA	NA	NA	-2.84326	5.31565e-16	NA	NA	3	glutathione S-transferase, putative, expressed
LOC_Os10g38600	NA	NA	NA	NA	NA	NA	2.06337	0.000113201	NA	NA	1	glutathione S-transferase GSTU6, putative, expressed
LOC_Os10g38610	NA	NA	NA	NA	NA	NA	NA	NA	-2.89146	5.12768e-17	3	glutathione S-transferase, putative, expressed
LOC_Os10g38860	NA	NA	NA	NA	NA	NA	NA	NA	2.09943	0.000859668	1	hydrolase, alpha/beta fold family domain containing protein, expressed
LOC_Os10g38910	NA	NA	NA	NA	NA	NA	4.51495	3.49667e-40	3.14282	7.17497e-21	1	expressed protein
LOC_Os10g39100	NA	NA	NA	NA	2.39987	1.6325e-20	2.68675	3.94922e-26	2.29585	2.31099e-19	1	uncharacterized Cys-rich domain containing protein, putative, expressed
LOC_Os10g39150	NA	NA	NA	NA	NA	NA	NA	NA	3.73197	4.84242e-20	1	expressed protein
LOC_Os10g39710	NA	NA	NA	NA	NA	NA	2.32409	0.000495577	NA	NA	1	strictosidine synthase, putative, expressed
LOC_Os10g40550	NA	NA	NA	NA	NA	NA	NA	NA	-2.38591	3.41187e-13	3	CPuORF23 - conserved peptide uORF-containing transcript, expressed
LOC_Os10g40640	4.09322	3.65717e-44	3.1124	4.64607e-25	2.26116	3.21139e-13	2.78725	3.87094e-21	NA	NA	1	glycosyl transferase 8 domain containing protein, putative, expressed
LOC_Os10g40720	NA	NA	NA	NA	NA	NA	NA	NA	3.62784	0.000155967	1	expansin precursor, putative, expressed
LOC_Os10g41020	NA	NA	NA	NA	NA	NA	2.09351	1.70234e-17	NA	NA	1	flavonol synthase/flavanone 3-hydroxylase, putative, expressed
LOC_Os10g41100	NA	NA	NA	NA	NA	NA	-3.43977	1.7227e-42	-8.51737	3.79386e-90	3	CCT motif family protein, expressed
LOC_Os10g41330	2.20686	7.62812e-07	NA	NA	NA	NA	NA	NA	NA	NA	1	AP2 domain containing protein, expressed
LOC_Os10g41420	2.08326	0.00691362	NA	NA	NA	NA	NA	NA	NA	NA	1	expressed protein
LOC_Os10g41430	2.84416	0.00329886	NA	NA	NA	NA	NA	NA	NA	NA	1	cyclin, putative, expressed
LOC_Os10g41550	NA	NA	NA	NA	NA	NA	2.11288	3.75199e-09	4.22655	1.23655e-31	1	beta-amylase, putative, expressed
LOC_Os10g41740	NA	NA	NA	NA	2.20235	0.000472524	2.30384	3.68986e-05	NA	NA	1	pentatricopeptide, putative, expressed
LOC_Os10g41780	NA	NA	NA	NA	NA	NA	-2.44682	3.23148e-37	-4.10857	5.49802e-91	3	chlorophyllide a oxygenase, chloroplast precursor, putative, expressed
LOC_Os10g42040	NA	NA	NA	NA	NA	NA	3.4897	7.94541e-06	2.91542	0.000275048	1	expressed protein
LOC_Os10g42150	NA	NA	NA	NA	-2.05981	0.00278139	NA	NA	NA	NA	3	transposon protein, putative, unclassified, expressed
LOC_Os10g42299	NA	NA	NA	NA	NA	NA	-2.26053	4.02882e-27	-2.52598	6.31919e-33	3	mitochondrial carrier protein, putative, expressed
LOC_Os10g42404	NA	NA	NA	NA	NA	NA	NA	NA	2.1082	0.00527085	1	expressed protein
LOC_Os10g42690	2.44324	9.04647e-31	2.32395	1.45447e-27	NA	NA	NA	NA	NA	NA	1	jmjC domain containing protein, expressed
LOC_Os10g42770	NA	NA	NA	NA	NA	NA	NA	NA	-2.0425	9.45787e-06	3	a_IG002N01.7, putative, expressed
LOC_Os10g42850	NA	NA	NA	NA	NA	NA	-2.4983	0.000267485	-2.5034	0.000841254	3	WRKY2, expressed
LOC_Os10g42900	NA	NA	NA	NA	NA	NA	NA	NA	-3.18917	1.26524e-22	1	peptide transporter PTR2, putative, expressed
LOC_Os10g42910	NA	NA	NA	NA	NA	NA	NA	NA	-2.38012	0.000530533	3	transposon protein, putative, unclassified, expressed
LOC_Os10g43060	2.70583	1.2245e-22	2.19965	4.05488e-15	NA	NA	NA	NA	NA	NA	1	expressed protein
LOC_Os11g01410	NA	NA	NA	NA	NA	NA	NA	NA	-2.11874	0.00165801	1	ammonium transporter protein, putative, expressed
LOC_Os11g01540	NA	NA	NA	NA	NA	NA	-3.83568	0.00199529	NA	NA	3	expressed protein
LOC_Os11g01590	NA	NA	NA	NA	NA	NA	-2.36316	3.27964e-37	NA	NA	3	nodulin, putative, expressed
LOC_Os11g01850	NA	NA	2.21863	3.02711e-05	NA	NA	NA	NA	NA	NA	1	SAG20, putative, expressed
LOC_Os11g02100	NA	NA	NA	NA	NA	NA	3.01794	5.49008e-08	5.84648	3.35096e-23	1	peroxidase precursor, putative, expressed
LOC_Os11g02424	NA	NA	NA	NA	NA	NA	-2.06877	2.16191e-17	-2.67257	3.30536e-27	3	LTPL9 - Protease inhibitor/seed storage/LTP family protein precursor, expressed
LOC_Os11g02520	2.51879	0.00791014	2.62192	0.00327195	NA	NA	NA	NA	NA	NA	1	WRKY104, expressed
LOC_Os11g02530	NA	NA	NA	NA	3.111	0.0459632	NA	NA	NA	NA	1	WRKY40, expressed
LOC_Os11g02610	NA	NA	NA	NA	NA	NA	NA	NA	-2.53874	9.38229e-11	3	BTBN20 - Bric-a-Brac, Tramtrack, Broad Complex BTB domain with non-phototropic hypocotyl 3 NPH3 and coiled-coil domains, expressed
LOC_Os11g03390	NA	NA	NA	NA	NA	NA	-3.88195	1.88937e-31	-4.43652	1.20721e-38	3	FHA domain containing protein, putative, expressed
LOC_Os11g03540	NA	NA	2.18176	0.0100328	3.48423	9.30299e-09	NA	NA	NA	NA	1	AP2 domain containing protein, expressed
LOC_Os11g03580	NA	NA	NA	NA	NA	NA	NA	NA	-2.94687	1.28535e-26	1	expressed protein
LOC_Os11g03650	NA	NA	2.05349	9.55925e-07	NA	NA	NA	NA	NA	NA	1	mla1, putative, expressed
LOC_Os11g03910	NA	NA	NA	NA	NA	NA	2.30856	2.90278e-13	NA	NA	1	zinc finger DHHC domain-containing protein, putative, expressed
LOC_Os11g04010	NA	NA	NA	NA	NA	NA	-2.77398	0.00073475	NA	NA	3	ICE-like protease p20 domain containing protein, putative, expressed
LOC_Os11g04150	NA	NA	NA	NA	NA	NA	-3.59179	3.75014e-09	-3.12111	8.54422e-07	3	major facilitator superfamily antiporter, putative, expressed
LOC_Os11g04300	3.14843	3.07909e-06	2.02471	0.0405647	NA	NA	NA	NA	NA	NA	1	retrotransposon protein, putative, unclassified, expressed
LOC_Os11g04560	NA	NA	NA	NA	2.10448	9.01358e-07	NA	NA	NA	NA	1	calmodulin-like protein 1, putative, expressed
LOC_Os11g04830	2.06009	0.0204514	NA	NA	NA	NA	NA	NA	NA	NA	1	embryogenesis transmembrane protein, putative, expressed
LOC_Os11g05190	NA	NA	NA	NA	NA	NA	2.25086	0.000151117	NA	NA	1	phytosulfokines precursor, putative, expressed
LOC_Os11g05380	4.63036	5.73102e-25	NA	NA	NA	NA	NA	NA	NA	NA	1	cytochrome P450, putative, expressed
LOC_Os11g05400	NA	NA	NA	NA	-2.23082	0.00014699	-3.11048	2.49276e-08	-2.37801	2.60488e-05	3	Ser/Thr protein phosphatase family protein, putative, expressed
LOC_Os11g06150	NA	NA	NA	NA	2.22777	1.392e-08	NA	NA	NA	NA	1	basic proline-rich protein precursor, putative, expressed
LOC_Os11g06460	NA	NA	5.99093	0.000257263	NA	NA	NA	NA	NA	NA	2	ribosome inactivating protein, expressed
LOC_Os11g07020	NA	NA	NA	NA	NA	NA	-3.03844	1.72185e-98	-2.3725	2.30016e-63	3	fructose-bisphospate aldolase isozyme, putative, expressed
LOC_Os11g07225	NA	NA	NA	NA	NA	NA	NA	NA	3.00952	1.91231e-09	1	expressed protein
LOC_Os11g07440	NA	NA	NA	NA	2.56126	1.17724e-30	3.18664	1.39822e-47	NA	NA	1	plant neutral invertase domain containing protein, expressed
LOC_Os11g07690	3.97746	7.86306e-12	4.1882	5.6229e-13	3.61643	3.48229e-09	3.21952	2.99061e-07	NA	NA	1	dirigent, putative, expressed
LOC_Os11g09110	NA	NA	NA	NA	NA	NA	NA	NA	2.56277	5.58482e-06	1	receptor-like protein kinase 5 precursor, putative, expressed
LOC_Os11g09418	NA	NA	NA	NA	NA	NA	2.02387	0.00059729	NA	NA	1	OsFBX399 - F-box domain containing protein, expressed
LOC_Os11g09478	NA	NA	NA	NA	NA	NA	2.35504	7.80792e-05	NA	NA	1	OsFBX402 - F-box domain containing protein, expressed
LOC_Os11g10250	NA	NA	NA	NA	NA	NA	2.22305	0.000489667	NA	NA	1	expressed protein
LOC_Os11g10260	NA	NA	NA	NA	NA	NA	3.96624	0.000119197	3.79849	0.000366367	1	retrotransposon protein, putative, Ty3-gypsy subclass, expressed
LOC_Os11g10290	NA	NA	2.03459	1.13177e-12	NA	NA	NA	NA	NA	NA	1	S-domain receptor-like protein kinase, putative, expressed
LOC_Os11g10470	4.46169	5.40635e-41	2.72991	2.02906e-14	NA	NA	2.09954	5.86649e-09	NA	NA	1	expressed protein
LOC_Os11g10490	NA	NA	NA	NA	NA	NA	NA	NA	2.03067	2.36087e-09	1	transposon protein, putative, CACTA, En/Spm sub-class, expressed
LOC_Os11g10710	NA	NA	2.02802	8.88077e-14	NA	NA	NA	NA	NA	NA	1	protein kinase domain containing protein, expressed
LOC_Os11g10800	NA	NA	NA	NA	NA	NA	NA	NA	2.19829	0.00165014	1	dirigent, putative, expressed
LOC_Os11g10990	NA	NA	NA	NA	NA	NA	-3.52297	9.29369e-79	-3.0132	6.43817e-62	3	heat shock protein DnaJ, putative, expressed
LOC_Os11g11000	NA	NA	NA	NA	NA	NA	-2.30759	4.70063e-93	NA	NA	3	ELMO/CED-12 family protein, putative, expressed
LOC_Os11g11320	NA	NA	NA	NA	NA	NA	-3.62448	4.63379e-20	-2.72246	2.04656e-13	3	retrotransposon protein, putative, unclassified, expressed
LOC_Os11g11330	NA	NA	NA	NA	NA	NA	-3.2046	4.56881e-30	-2.96287	1.40556e-26	3	retrotransposon protein, putative, unclassified, expressed
LOC_Os11g11780	NA	NA	NA	NA	NA	NA	2.68307	0.00032287	3.0107	6.50657e-05	1	cysteine-rich receptor-like protein kinase 21 precursor, putative, expressed
LOC_Os11g11970	NA	NA	NA	NA	NA	NA	2.51878	0.00161331	NA	NA	1	expressed protein
LOC_Os11g13820	3.47043	0.000497573	NA	NA	NA	NA	NA	NA	2.70497	0.0137705	1	protein phosphatase 2C, putative, expressed
[truncated: 213 more rows]
